# Supplementary material
Source: HighWire-hosted journal article supplement (https://openres.ersjournals.com/content/5/3/00128-2017)
Supplement: inline-supplementary-material-7 [file inline-supplementary-material-7.xlsx]

## Sheet: Supplementary Table 2a (UA)
Correlation Weight (r)	Streptococcus	Prevotella	Veillonella	Neisseria	Actinomyces	Capnocytophaga	Gemella	Porphyromonas	Propionibacterium	Rothia	Staphylococcus	Campylobacter	Leptotrichia	Haemophilus	Fusobacterium	Granulicatella	p_Candidate_division_tm7_Unclassified	Derxia	Selenomonas	c_Betaproteobacteria_Unclassified_1	Oribacterium	Bergeyella	Dolosigranulum	c_Clostridia_Unclassified_1	Corynebacterium	k_Bacteria_Unclassified	Kingella	c_Betaproteobacteria_Unclassified_2
Streptococcus	1	-0.195248	0.0212471	-0.0643763	-0.0570987	-0.281939	0.678506	0.000203908	-0.178309	0.155363	-0.272936	-0.166021	-0.241252	0.450447	-0.237435	0.414485	-0.255197	-0.0361194	-0.351261	0.203404	-0.0679663	0.137974	-0.2901	-0.279873	-0.260816	0.158766	0.026919	-0.153904
Prevotella	-0.195248	1	0.620478	-0.0235598	-0.00944974	-0.0202659	-0.0377937	0.257969	-0.187763	-0.237082	-0.192152	0.709436	0.374025	-0.0431758	0.417746	0.253379	0.644178	-0.196608	0.56249	0.078321	0.64496	-0.252712	-0.250583	0.537534	-0.384544	-0.0542896	-0.269877	-0.204843
Veillonella	0.0212471	0.620478	1	0.0348567	0.177168	0.0115102	-0.0614584	0.101588	-0.266537	-0.0479433	-0.264167	0.65245	0.319603	0.0233962	0.16034	0.35064	0.473202	-0.157157	0.378152	0.202112	0.638281	-0.168277	-0.272053	0.300043	-0.281248	0.141112	-0.0813821	-0.226742
Neisseria	-0.0643763	-0.0235598	0.0348567	1	0.259509	0.545034	0.0818075	0.403667	-0.241561	0.336701	-0.301056	0.0773815	0.311567	0.278752	0.298678	0.241182	0.104984	0.421883	0.0652087	0.255928	0.105258	0.444903	-0.241077	0.102441	-0.0202197	0.287785	0.210931	0.33844
Actinomyces	-0.0570987	-0.00944974	0.177168	0.259509	1	0.435856	-0.227956	-0.101353	-0.274673	0.594813	-0.260634	0.0464386	0.425991	-0.132131	0.21085	-0.107334	0.120763	0.360046	0.278659	0.238146	-0.018095	0.180687	-0.244724	-0.00355422	0.314332	0.492146	0.412399	0.304419
Capnocytophaga	-0.281939	-0.0202659	0.0115102	0.545034	0.435856	1	-0.14012	0.354691	-0.288443	0.336091	-0.275447	0.0728251	0.490331	0.0527849	0.490861	-0.100485	0.169819	0.527618	0.376695	-0.032969	-0.06147	0.55239	-0.218265	0.0932437	0.0956389	0.146111	0.482077	0.584574
Gemella	0.678506	-0.0377937	-0.0614584	0.0818075	-0.227956	-0.14012	1	0.325319	-0.115403	-0.000350973	-0.208259	-0.0992331	-0.169815	0.50288	0.025449	0.446325	-0.121166	-0.0495224	-0.275983	0.0983155	0.0198923	0.228368	-0.234597	-0.072669	-0.332353	-0.0349057	-0.0609834	-0.0489088
Porphyromonas	0.000203908	0.257969	0.101588	0.403667	-0.101353	0.354691	0.325319	1	-0.216176	-0.0757025	-0.233829	0.157078	0.252873	0.367659	0.510997	0.27149	0.262859	0.167486	0.183713	-0.0187288	0.195448	0.33219	-0.226817	0.308485	-0.214835	-0.0958631	0.0321011	0.187822
Propionibacterium	-0.178309	-0.187763	-0.266537	-0.241561	-0.274673	-0.288443	-0.115403	-0.216176	1	-0.187785	0.590418	-0.166448	-0.240957	-0.201407	-0.242197	-0.180679	-0.160582	-0.125063	-0.19511	-0.0700781	-0.114177	-0.265384	0.370748	0.013545	0.123099	-0.168504	-0.130516	-0.165058
Rothia	0.155363	-0.237082	-0.0479433	0.336701	0.594813	0.336091	-0.000350973	-0.0757025	-0.187785	1	-0.243021	-0.171159	0.149218	0.128307	0.0321318	0.0852833	-0.0969386	0.478983	0.0302496	0.614676	-0.135441	0.309299	-0.213534	-0.155015	0.272589	0.786159	0.427451	0.342253
Staphylococcus	-0.272936	-0.192152	-0.264167	-0.301056	-0.260634	-0.275447	-0.208259	-0.233829	0.590418	-0.243021	1	-0.154553	-0.22215	-0.283538	-0.249977	-0.249003	-0.198159	-0.166476	-0.176149	-0.14985	-0.14197	-0.296793	0.446876	-0.0601735	0.209949	-0.210553	-0.178533	-0.15715
Campylobacter	-0.166021	0.709436	0.65245	0.0773815	0.0464386	0.0728251	-0.0992331	0.157078	-0.166448	-0.171159	-0.154553	1	0.438871	-0.0522508	0.308965	0.206443	0.655181	-0.163194	0.607875	0.114871	0.74148	-0.16283	-0.240462	0.530197	-0.351946	-0.0203428	-0.214056	-0.21817
Leptotrichia	-0.241252	0.374025	0.319603	0.311567	0.425991	0.490331	-0.169815	0.252873	-0.240957	0.149218	-0.22215	0.438871	1	-0.119839	0.522174	-0.0282708	0.496542	0.196109	0.56319	0.134536	0.350349	0.10887	-0.233076	0.367624	-0.0447841	0.196999	0.116303	0.233008
Haemophilus	0.450447	-0.0431758	0.0233962	0.278752	-0.132131	0.0527849	0.50288	0.367659	-0.201407	0.128307	-0.283538	-0.0522508	-0.119839	1	0.0817051	0.333448	-0.0937814	0.159106	-0.185406	0.173675	-0.0138934	0.388968	-0.216537	-0.0418175	-0.225827	0.0954133	0.0591613	-0.00830546
Fusobacterium	-0.237435	0.417746	0.16034	0.298678	0.21085	0.490861	0.025449	0.510997	-0.242197	0.0321318	-0.249977	0.308965	0.522174	0.0817051	1	0.0126667	0.426115	0.164857	0.473298	0.0197376	0.296555	0.248454	-0.250012	0.393022	-0.151834	0.0299113	0.0600326	0.226764
Granulicatella	0.414485	0.253379	0.35064	0.241182	-0.107334	-0.100485	0.446325	0.27149	-0.180679	0.0852833	-0.249003	0.206443	-0.0282708	0.333448	0.0126667	1	0.114232	-0.0805554	-0.108946	0.341208	0.28534	0.107778	-0.222164	0.0402618	-0.311597	0.186561	-0.0879633	-0.12549
p_Candidate_division_tm7_Unclassified	-0.255197	0.644178	0.473202	0.104984	0.120763	0.169819	-0.121166	0.262859	-0.160582	-0.0969386	-0.198159	0.655181	0.496542	-0.0937814	0.426115	0.114232	1	-0.0627018	0.642483	0.13787	0.667514	-0.12949	-0.198884	0.651904	-0.3148	0.045033	-0.178022	-0.0872099
Derxia	-0.0361194	-0.196608	-0.157157	0.421883	0.360046	0.527618	-0.0495224	0.167486	-0.125063	0.478983	-0.166476	-0.163194	0.196109	0.159106	0.164857	-0.0805554	-0.0627018	1	0.164421	0.130096	-0.172984	0.401315	-0.156654	-0.105244	0.117546	0.278015	0.496797	0.481496
Selenomonas	-0.351261	0.56249	0.378152	0.0652087	0.278659	0.376695	-0.275983	0.183713	-0.19511	0.0302496	-0.176149	0.607875	0.56319	-0.185406	0.473298	-0.108946	0.642483	0.164421	1	-0.00552914	0.430045	-0.0114959	-0.204688	0.451158	-0.163297	0.0259865	0.0970468	0.118343
c_Betaproteobacteria_Unclassified_1	0.203404	0.078321	0.202112	0.255928	0.238146	-0.032969	0.0983155	-0.0187288	-0.0700781	0.614676	-0.14985	0.114871	0.134536	0.173675	0.0197376	0.341208	0.13787	0.130096	-0.00552914	1	0.287825	-0.012084	-0.180446	0.0932493	0.0074099	0.767724	0.0271942	-0.0180033
Oribacterium	-0.0679663	0.64496	0.638281	0.105258	-0.018095	-0.06147	0.0198923	0.195448	-0.114177	-0.135441	-0.14197	0.74148	0.350349	-0.0138934	0.296555	0.28534	0.667514	-0.172984	0.430045	0.287825	1	-0.252264	-0.191674	0.568864	-0.424195	0.0905751	-0.345736	-0.286218
Bergeyella	0.137974	-0.252712	-0.168277	0.444903	0.180687	0.55239	0.228368	0.33219	-0.265384	0.309299	-0.296793	-0.16283	0.10887	0.388968	0.248454	0.107778	-0.12949	0.401315	-0.0114959	-0.012084	-0.252264	1	-0.204538	-0.175621	0.0438958	0.142138	0.449162	0.4066
Dolosigranulum	-0.2901	-0.250583	-0.272053	-0.241077	-0.244724	-0.218265	-0.234597	-0.226817	0.370748	-0.213534	0.446876	-0.240462	-0.233076	-0.216537	-0.250012	-0.222164	-0.198884	-0.156654	-0.204688	-0.180446	-0.191674	-0.204538	1	-0.108614	0.255489	-0.170572	-0.112887	-0.104359
c_Clostridia_Unclassified_1	-0.279873	0.537534	0.300043	0.102441	-0.00355422	0.0932437	-0.072669	0.308485	0.013545	-0.155015	-0.0601735	0.530197	0.367624	-0.0418175	0.393022	0.0402618	0.651904	-0.105244	0.451158	0.0932493	0.568864	-0.175621	-0.108614	1	-0.278078	-0.0524864	-0.234223	-0.0996449
Corynebacterium	-0.260816	-0.384544	-0.281248	-0.0202197	0.314332	0.0956389	-0.332353	-0.214835	0.123099	0.272589	0.209949	-0.351946	-0.0447841	-0.225827	-0.151834	-0.311597	-0.3148	0.117546	-0.163297	0.0074099	-0.424195	0.0438958	0.255489	-0.278078	1	0.181264	0.262403	0.206173
k_Bacteria_Unclassified	0.158766	-0.0542896	0.141112	0.287785	0.492146	0.146111	-0.0349057	-0.0958631	-0.168504	0.786159	-0.210553	-0.0203428	0.196999	0.0954133	0.0299113	0.186561	0.045033	0.278015	0.0259865	0.767724	0.0905751	0.142138	-0.170572	-0.0524864	0.181264	1	0.225428	0.149853
Kingella	0.026919	-0.269877	-0.0813821	0.210931	0.412399	0.482077	-0.0609834	0.0321011	-0.130516	0.427451	-0.178533	-0.214056	0.116303	0.0591613	0.0600326	-0.0879633	-0.178022	0.496797	0.0970468	0.0271942	-0.345736	0.449162	-0.112887	-0.234223	0.262403	0.225428	1	0.48584
c_Betaproteobacteria_Unclassified_2	-0.153904	-0.204843	-0.226742	0.33844	0.304419	0.584574	-0.0489088	0.187822	-0.165058	0.342253	-0.15715	-0.21817	0.233008	-0.00830546	0.226764	-0.12549	-0.0872099	0.481496	0.118343	-0.0180033	-0.286218	0.4066	-0.104359	-0.0996449	0.206173	0.149853	0.48584	1
Benjamini-Hochberg-Yekutieli P-adjust	Streptococcus	Prevotella	Veillonella	Neisseria	Actinomyces	Capnocytophaga	Gemella	Porphyromonas	Propionibacterium	Rothia	Staphylococcus	Campylobacter	Leptotrichia	Haemophilus	Fusobacterium	Granulicatella	p_Candidate_division_tm7_Unclassified	Derxia	Selenomonas	c_Betaproteobacteria_Unclassified_1	Oribacterium	Bergeyella	Dolosigranulum	c_Clostridia_Unclassified_1	Corynebacterium	k_Bacteria_Unclassified	Kingella	c_Betaproteobacteria_Unclassified_2
Streptococcus	NA	3.01376e-07	1	0.34729	0.509477	1.94417e-14	0	1	3.89888e-06	7.83974e-05	1.22483e-13	2.12069e-05	8.73817e-11	0	1.72522e-10	0	5.20261e-12	1	0	8.39477e-08	0.290718	0.00059386	0	2.66629e-14	1.69532e-12	5.31908e-05	1	8.9622e-05
Prevotella	2.34404e-07	NA	0	1	1	1	1	2.59176e-12	6.94522e-07	1.48078e-10	3.65595e-07	0	0	1	0	6.40411e-12	0	1.98881e-07	0	0.144751	0	6.81597e-12	9.94695e-12	0	0	0.622245	1.98306e-13	5.3405e-08
Veillonella	1	0	NA	1	4.61455e-06	1	0.414039	0.0239742	3.86007e-13	0.829534	6.02694e-13	0	0	1	4.31533e-05	0	0	6.20696e-05	0	9.6937e-08	0	1.54996e-05	1.21316e-13	0	1.55534e-14	0.000433167	0.116091	1.27434e-09
Neisseria	0.318349	1	1	NA	1.69532e-12	0	0.112526	0	6.22417e-11	0	0	0.147656	0	2.12092e-14	0	6.22417e-11	0.0186435	0	0.315602	3.41696e-12	0.0186435	0	6.22417e-11	0.0222358	1	2.33301e-15	1.75164e-08	0
Actinomyces	0.509477	1	3.84546e-06	1.69532e-12	NA	0	8.76579e-10	0.0222487	6.53242e-14	0	1.44434e-12	0.856735	0	0.00121231	1.88764e-08	0.0136115	0.00387288	0	2.85145e-14	1.28305e-10	1	2.41308e-06	3.63698e-11	1	0	0	0	0
Capnocytophaga	8.97311e-15	1	1	0	0	NA	0.000513899	0	1.94417e-15	0	3.99944e-14	0.201942	0	0.618593	0	0.0277915	1.24809e-05	0	0	1	0.395765	0	5.34194e-09	0.0463307	0.0399131	0.000265653	0	0
Gemella	0	1	0.468409	0.139002	1.46097e-09	0.000770849	NA	0	0.00947113	1	4.74844e-08	0.0392335	1.81629e-05	0	1	0	0.0057177	0.825939	7.77669e-14	0.0397943	1	1.46097e-09	5.18831e-10	0.249416	0	1	0.468409	0.825939
Porphyromonas	1	2.85094e-12	0.0222487	0	0.0222487	0	0	NA	8.35867e-09	0.152162	3.51919e-10	5.64427e-05	7.78376e-12	0	0	1.69143e-13	1.07837e-12	1.45748e-05	1.44164e-06	1	2.55304e-07	0	1.25618e-09	0	9.92762e-09	0.0340626	1	8.09529e-07
Propionibacterium	3.6552e-06	9.92174e-07	8.49215e-13	1.1283e-10	1.63311e-13	7.77669e-15	0.00552483	1.17021e-08	NA	9.92174e-07	0	1.77705e-05	1.13379e-10	1.38882e-07	1.1283e-10	2.73846e-06	3.55154e-05	0.00225176	3.59595e-07	0.204927	0.00597885	9.1765e-13	0	1	0.00264623	1.4131e-05	0.00131107	2.03897e-05
Rothia	8.68211e-05	1.85097e-10	0.79497	0	0	0	1	0.158778	9.88689e-07	NA	6.09551e-11	1.10103e-05	0.000171044	0.00175118	1	0.0828429	0.0340821	0	1	0	0.000835732	0	1.44518e-08	8.68211e-05	1.07318e-13	0	0	0
Staphylococcus	1.3998e-13	3.65595e-07	9.04041e-13	0	1.76531e-12	9.33203e-14	2.7932e-08	3.24848e-10	0	5.58755e-11	NA	6.52731e-05	2.8011e-09	1.86641e-14	1.58271e-11	1.76587e-11	1.45607e-07	1.44825e-05	3.82812e-06	0.000113823	0.000285959	0	0	0.363849	2.21083e-08	2.12145e-08	2.82864e-06	4.86202e-05
Campylobacter	2.12069e-05	0	0	0.141236	0.790833	0.185114	0.0267501	5.94134e-05	2.12069e-05	1.17967e-05	7.83277e-05	NA	0	0.610977	0	4.99799e-08	0	2.91627e-05	0	0.00665195	0	2.91627e-05	1.1278e-10	0	0	1	1.42651e-08	7.4112e-09
Leptotrichia	7.28865e-11	0	0	0	0	0	9.98961e-06	7.13512e-12	7.28865e-11	0.000146609	2.30679e-09	0	NA	0.00370043	0	1	0	1.93047e-07	0	0.000799674	0	0.00991521	3.09931e-10	0	0.857195	1.76184e-07	0.00505557	3.09931e-10
Haemophilus	0	1	1	3.33287e-14	0.00164528	0.694292	0	0	1.52771e-07	0.00233491	1.55534e-14	0.694292	0.00531937	NA	0.125309	0	0.0517226	6.64939e-05	1.81975e-06	9.59679e-06	1	0	1.2181e-08	1	2.4624e-09	0.0478485	0.520917	1
Fusobacterium	1.38018e-10	0	3.86109e-05	0	1.7766e-08	0	1	0	5.66621e-11	1	1.31893e-11	0	0	0.113375	NA	1	0	2.21225e-05	0	1	0	1.67636e-11	1.31893e-11	0	0.000110849	1	0.450227	1.03106e-09
Granulicatella	0	8.53881e-12	0	8.8631e-11	0.0142921	0.0251447	0	1.69143e-13	2.73846e-06	0.079241	1.94246e-11	4.99799e-08	1	0	1	NA	0.0087456	0.107887	0.0136735	0	6.66574e-15	0.0142921	3.25909e-09	1	0	1.19593e-06	0.0674078	0.00295938
p_Candidate_division_tm7_Unclassified	4.72964e-12	0	0	0.0161012	0.00387288	1.3313e-05	0.00387288	9.70531e-13	4.43942e-05	0.0311184	2.0161e-07	0	0	0.038792	0	0.00707977	NA	0.325286	0	0.000707081	0	0.00171129	1.93755e-07	0	0	0.81559	4.35897e-06	0.0628914
Derxia	1	3.66789e-07	6.20696e-05	0	0	0	0.677317	2.30768e-05	0.00235899	0	2.45089e-05	3.1226e-05	3.66789e-07	5.08483e-05	2.81828e-05	0.107887	0.338297	NA	2.81828e-05	0.00144138	1.15654e-05	0	6.27994e-05	0.0150424	0.00487402	3.49951e-14	0	0
Selenomonas	0	0	0	0.315602	2.33301e-14	0	3.88835e-14	1.62185e-06	3.08224e-07	1	4.72886e-06	0	0	1.33448e-06	0	0.0117202	0	2.34856e-05	NA	1	0	1	6.74988e-08	0	2.59332e-05	1	0.0322368	0.00495014
c_Betaproteobacteria_Unclassified_1	1.55903e-07	0.168876	1.6964e-07	8.88409e-12	2.99379e-10	1	0.0397943	1	0.280426	0	0.000258688	0.00931273	0.00135329	1.15161e-05	1	0	0.0010017	0.00205911	1	NA	5.83252e-15	1	4.72613e-06	0.0572058	1	0	1	1
Oribacterium	0.265438	0	0	0.0164549	1	0.379275	1	2.72325e-07	0.00747356	0.000835732	0.000413051	0	0	1	0	3.58924e-15	0	7.48349e-06	0	2.12092e-15	NA	6.96403e-12	4.68567e-07	0	0	0.0548619	0	3.58924e-15
Bergeyella	0.000565581	8.05524e-12	1.37774e-05	0	2.56389e-06	0	8.68226e-10	0	5.5059e-13	0	0	2.76278e-05	0.0107774	0	1.67636e-11	0.0114312	0.00140014	0	1	1	8.1247e-12	NA	6.00068e-08	5.1078e-06	0.930212	0.000364429	0	0
Dolosigranulum	0	2.24435e-11	3.03291e-13	1.10652e-10	5.91009e-11	5.34194e-09	3.30165e-10	1.25618e-09	0	1.10514e-08	0	1.1278e-10	4.0774e-10	6.85183e-09	2.24435e-11	2.7935e-09	1.16253e-07	4.97162e-05	4.73738e-08	1.93342e-06	3.57004e-07	4.73738e-08	NA	0.00976454	9.76597e-12	7.80512e-06	0.00677426	0.0138797
c_Clostridia_Unclassified_1	1.86641e-14	0	0	0.0261598	1	0.0486472	0.213785	0	1	0.000105426	0.446542	0	0	1	0	1	0	0.0216234	0	0.0486472	0	6.67943e-06	0.0169252	NA	2.5451e-14	0.655843	3.25702e-10	0.0315531
Corynebacterium	1.27149e-12	0	1.74976e-14	1	0	0.034707	0	9.92762e-09	0.00289826	1.07318e-13	2.21083e-08	0	0.928628	1.40708e-09	0.000110849	0	0	0.00487402	2.59332e-05	1	0	0.930212	3.75614e-12	3.11068e-14	NA	2.08977e-06	9.75621e-13	4.00386e-08
k_Bacteria_Unclassified	6.95572e-05	0.651876	0.000484128	5.83252e-15	0	0.000301073	1	0.0428118	2.00189e-05	0	4.54596e-08	1	3.96414e-07	0.0428118	1	1.86034e-06	0.957432	5.59922e-14	1	0	0.0603481	0.000455537	1.63198e-05	0.685654	3.76158e-06	NA	3.53989e-09	0.000203161
Kingella	1	2.47882e-13	0.116091	2.29061e-08	0	0	0.425827	1	0.00172078	0	4.04092e-06	1.42651e-08	0.00713728	0.434097	0.430652	0.0741486	4.06838e-06	0	0.0373269	1	0	0	0.0094087	3.90842e-10	1.19243e-12	1.93085e-09	NA	0
c_Betaproteobacteria_Unclassified_2	9.4601e-05	6.10343e-08	1.50604e-09	0	0	0	0.726827	9.17466e-07	2.42128e-05	0	6.57802e-05	6.7936e-09	5.50989e-10	1	1.50604e-09	0.0023675	0.0655119	0	0.00471442	1	5.83252e-15	0	0.0170342	0.0246937	5.23581e-08	0.000149697	0	NA

## Sheet: Supplementary Table 2b (AKG)
Correlation Weight (r)	Streptococcus	Prevotella	Veillonella	Gemella	Haemophilus	Granulicatella	Neisseria	Porphyromonas	Campylobacter	Bergeyella	Actinomyces	Fusobacterium	Capnocytophaga	c_Gammaproteobacteria_Unclassified_1	Selenomonas	Leptotrichia	c_Betaproteobacteria_Unclassified_2	c_Tm7_phylum_sp._oral_clone_fr058_Candidate_division_tm7	Rothia	Kingella	c_Bacilli_Unclassified_1	Lactobacillus	Actinobacillus	c_Betaproteobacteria_Unclassified_1	c_Actinobacteria_Unclassified_1	k_Bacteria_Unclassified	Derxia
Streptococcus	1	-0.703252	-0.550132	-0.0519785	0.0766023	-0.560661	-0.122623	-0.631369	-0.434761	-0.0799993	0.0480968	-0.472122	-0.398975	-0.00350656	-0.289601	-0.267103	-0.147217	-0.237655	0.149701	-0.259682	-0.200417	-0.395769	0.101741	-0.0487501	-0.0398839	0.0614917	-0.0640859
Prevotella	-0.703252	1	0.566255	0.00884318	-0.191483	0.468113	-0.034631	0.553634	0.492227	-0.113338	-0.193374	0.479804	0.153923	-0.122392	0.221916	0.0566155	-0.015798	0.29254	-0.280721	0.0266319	0.0324684	0.477204	-0.176516	-0.113148	-0.121307	-0.207021	-0.0970901
Veillonella	-0.550132	0.566255	1	-0.241018	-0.0985483	0.312372	-0.209953	0.2968	0.490602	-0.0769487	0.148261	0.286698	0.278558	-0.365098	0.319072	0.280081	-0.0659629	-0.0523921	-0.182093	0.32464	0.213994	0.513955	-0.415315	-0.09622	0.0947571	-0.158626	-0.12259
Gemella	-0.0519785	0.00884318	-0.241018	1	-0.154027	0.237453	0.178646	0.0332243	-0.205649	0.0462976	-0.074395	0.106831	-0.124138	0.0884298	-0.184294	-0.010982	0.212922	0.232179	0.152144	-0.0572778	0.223087	0.062399	0.158239	0.283103	-0.0400926	0.0436973	0.0704756
Haemophilus	0.0766023	-0.191483	-0.0985483	-0.154027	1	-0.194436	0.115416	-0.0343395	-0.0864624	0.291854	-0.0159931	-0.144504	-0.0213861	0.297374	-0.151237	0.0652178	-0.22898	-0.122293	0.0677593	0.0164804	-0.0429999	-0.11776	0.314677	0.121194	-0.172999	0.185343	0.158446
Granulicatella	-0.560661	0.468113	0.312372	0.237453	-0.194436	1	0.0935516	0.656515	-0.0453525	-0.0176175	-0.297354	0.227663	-0.0114893	-0.128067	-0.0335419	-0.0273341	-0.0627509	0.149142	-0.264874	0.00402706	0.313466	0.442121	-0.172655	-0.0482439	-0.0809017	-0.14182	-0.116646
Neisseria	-0.122623	-0.034631	-0.209953	0.178646	0.115416	0.0935516	1	0.140909	-0.0532733	0.378845	0.177504	0.112997	0.262515	0.284581	-0.185814	0.172784	0.0634551	0.0111748	0.263257	0.333064	0.296733	-0.0435445	0.241431	0.4146	0.205502	0.389046	0.469143
Porphyromonas	-0.631369	0.553634	0.2968	0.0332243	-0.0343395	0.656515	0.140909	1	0.207479	0.150587	-0.183162	0.418942	0.246022	-0.0792284	0.152272	0.0801192	0.138339	0.157724	-0.143517	0.0519245	0.228273	0.367462	-0.110323	-0.0154098	-0.13861	-0.036943	0.0433191
Campylobacter	-0.434761	0.492227	0.490602	-0.205649	-0.0864624	-0.0453525	-0.0532733	0.207479	1	0.0293591	0.194441	0.45624	0.511185	-0.00550387	0.587153	0.264295	0.116328	0.0643468	-0.113291	0.328679	-0.0250309	0.0992919	-0.128059	-0.0868558	0.180765	-0.137593	-0.0204247
Bergeyella	-0.0799993	-0.113338	-0.0769487	0.0462976	0.291854	-0.0176175	0.378845	0.150587	0.0293591	1	0.0878335	0.187574	0.312771	0.34905	-0.0796509	0.297758	0.0869723	0.0522881	0.243088	0.172256	0.20932	-0.225092	0.295678	0.295819	0.101146	0.318394	0.0255086
Actinomyces	0.0480968	-0.193374	0.148261	-0.074395	-0.0159931	-0.297354	0.177504	-0.183162	0.194441	0.0878335	1	0.198024	0.431358	-0.0638691	0.201342	0.532099	0.178898	-0.0803861	0.423215	0.413177	0.276435	-0.0820716	-0.150025	0.239543	0.204598	0.314342	0.373742
Fusobacterium	-0.472122	0.479804	0.286698	0.106831	-0.144504	0.227663	0.112997	0.418942	0.45624	0.187574	0.198024	1	0.445845	-0.0161274	0.367368	0.422254	0.183431	0.351636	-0.0377204	0.0870258	0.225117	0.106433	-0.107885	0.000450698	0.124352	0.0553108	0.131419
Capnocytophaga	-0.398975	0.153923	0.278558	-0.124138	-0.0213861	-0.0114893	0.262515	0.246022	0.511185	0.312771	0.431358	0.445845	1	-0.0636781	0.508572	0.564151	0.357985	0.0171129	0.217856	0.458886	0.158201	-0.0347424	-0.079691	0.224452	0.27551	0.202464	0.247513
c_Gammaproteobacteria_Unclassified_1	-0.00350656	-0.122392	-0.365098	0.0884298	0.297374	-0.128067	0.284581	-0.0792284	-0.00550387	0.34905	-0.0638691	-0.0161274	-0.0636781	1	-0.135975	-0.0392985	0.0237838	0.0773952	0.116459	0.0775253	-0.196247	-0.157801	0.745239	0.15068	-0.0541727	0.220221	0.104297
Selenomonas	-0.289601	0.221916	0.319072	-0.184294	-0.151237	-0.0335419	-0.185814	0.152272	0.587153	-0.0796509	0.201342	0.367368	0.508572	-0.135975	1	0.39674	0.32997	-0.00145791	-0.0558238	0.319253	-0.046727	0.134017	-0.246241	-0.0382311	0.213952	-0.0715823	0.132968
Leptotrichia	-0.267103	0.0566155	0.280081	-0.010982	0.0652178	-0.0273341	0.172784	0.0801192	0.264295	0.297758	0.532099	0.422254	0.564151	-0.0392985	0.39674	1	0.270771	0.00437327	0.187835	0.427393	0.311587	0.0122795	-0.121551	0.179817	0.297883	0.223383	0.306068
c_Betaproteobacteria_Unclassified_2	-0.147217	-0.015798	-0.0659629	0.212922	-0.22898	-0.0627509	0.0634551	0.138339	0.116328	0.0869723	0.178898	0.183431	0.357985	0.0237838	0.32997	0.270771	1	0.00123621	0.0629079	0.195285	0.0767385	-0.117976	0.0255729	0.16512	0.0866705	-0.0218766	0.175308
c_Tm7_phylum_sp._oral_clone_fr058_Candidate_division_tm7	-0.237655	0.29254	-0.0523921	0.232179	-0.122293	0.149142	0.0111748	0.157724	0.0643468	0.0522881	-0.0803861	0.351636	0.0171129	0.0773952	-0.00145791	0.00437327	0.00123621	1	0.0452575	-0.157812	-0.000885522	0.0788174	0.137829	0.256063	-0.116807	0.0750555	-0.165521
Rothia	0.149701	-0.280721	-0.182093	0.152144	0.0677593	-0.264874	0.263257	-0.143517	-0.113291	0.243088	0.423215	-0.0377204	0.217856	0.116459	-0.0558238	0.187835	0.0629079	0.0452575	1	0.0980317	0.0697304	-0.158992	0.177537	0.566334	0.190167	0.665576	0.177198
Kingella	-0.259682	0.0266319	0.32464	-0.0572778	0.0164804	0.00402706	0.333064	0.0519245	0.328679	0.172256	0.413177	0.0870258	0.458886	0.0775253	0.319253	0.427393	0.195285	-0.157812	0.0980317	1	0.236552	0.191224	-0.0776037	0.116195	0.313756	0.0539471	0.23267
c_Bacilli_Unclassified_1	-0.200417	0.0324684	0.213994	0.223087	-0.0429999	0.313466	0.296733	0.228273	-0.0250309	0.20932	0.276435	0.225117	0.158201	-0.196247	-0.046727	0.311587	0.0767385	-0.000885522	0.0697304	0.236552	1	0.122548	-0.188334	0.212447	0.0982759	0.207228	0.16132
Lactobacillus	-0.395769	0.477204	0.513955	0.062399	-0.11776	0.442121	-0.0435445	0.367462	0.0992919	-0.225092	-0.0820716	0.106433	-0.0347424	-0.157801	0.134017	0.0122795	-0.117976	0.0788174	-0.158992	0.191224	0.122548	1	-0.218281	-0.123688	-0.0689927	-0.180669	-0.137484
Actinobacillus	0.101741	-0.176516	-0.415315	0.158239	0.314677	-0.172655	0.241431	-0.110323	-0.128059	0.295678	-0.150025	-0.107885	-0.079691	0.745239	-0.246241	-0.121551	0.0255729	0.137829	0.177537	-0.0776037	-0.188334	-0.218281	1	0.141547	-0.080714	0.263586	0.0847044
c_Betaproteobacteria_Unclassified_1	-0.0487501	-0.113148	-0.09622	0.283103	0.121194	-0.0482439	0.4146	-0.0154098	-0.0868558	0.295819	0.239543	0.000450698	0.224452	0.15068	-0.0382311	0.179817	0.16512	0.256063	0.566334	0.116195	0.212447	-0.123688	0.141547	1	0.106966	0.565956	0.225949
c_Actinobacteria_Unclassified_1	-0.0398839	-0.121307	0.0947571	-0.0400926	-0.172999	-0.0809017	0.205502	-0.13861	0.180765	0.101146	0.204598	0.124352	0.27551	-0.0541727	0.213952	0.297883	0.0866705	-0.116807	0.190167	0.313756	0.0982759	-0.0689927	-0.080714	0.106966	1	0.170593	0.231355
k_Bacteria_Unclassified	0.0614917	-0.207021	-0.158626	0.0436973	0.185343	-0.14182	0.389046	-0.036943	-0.137593	0.318394	0.314342	0.0553108	0.202464	0.220221	-0.0715823	0.223383	-0.0218766	0.0750555	0.665576	0.0539471	0.207228	-0.180669	0.263586	0.565956	0.170593	1	0.334432
Derxia	-0.0640859	-0.0970901	-0.12259	0.0704756	0.158446	-0.116646	0.469143	0.0433191	-0.0204247	0.0255086	0.373742	0.131419	0.247513	0.104297	0.132968	0.306068	0.175308	-0.165521	0.177198	0.23267	0.16132	-0.137484	0.0847044	0.225949	0.231355	0.334432	1
Benjamini-Hochberg-Yekutieli P-adjust
X	Streptococcus	Prevotella	Veillonella	Gemella	Haemophilus	Granulicatella	Neisseria	Porphyromonas	Campylobacter	Bergeyella	Actinomyces	Fusobacterium	Capnocytophaga	c_Gammaproteobacteria_Unclassified_1	Selenomonas	Leptotrichia	c_Betaproteobacteria_Unclassified_2	c_Tm7_phylum_sp._oral_clone_fr058_Candidate_division_tm7	Rothia	Kingella	c_Bacilli_Unclassified_1	Lactobacillus	Actinobacillus	c_Betaproteobacteria_Unclassified_1	c_Actinobacteria_Unclassified_1	k_Bacteria_Unclassified	Derxia
Streptococcus	NA	3.09305e-12	1.70351e-06	1	1	8.15595e-07	1	2.76657e-09	0.000430698	1	1	0.000195494	0.00185107	1	0.0816023	0.103091	1	0.610659	1	0.168617	0.483406	0.00371031	1	1	1	1	1
Prevotella	3.09305e-12	NA	1.09138e-06	1	1	0.000161335	1	8.91411e-07	3.52653e-05	1	0.52057	0.000195494	0.815494	1	0.389317	1	1	0.298993	0.211602	1	1	0.000148569	0.916844	1	1	0.49527	1
Veillonella	8.51754e-07	5.4569e-07	NA	0.757705	1	0.053844	0.464287	0.087622	3.52653e-05	1	0.89951	0.079033	0.0892823	0.0254078	0.0371298	0.0862126	1	1	0.775578	0.0360187	0.451943	3.56096e-05	0.00317368	1	1	0.890951	1
Gemella	1	1	0.175552	NA	1	0.298313	0.668181	1	0.56138	1	1	1	1	1	0.626277	1	0.956007	0.610659	1	1	0.451943	1	1	0.158015	1	1	1
Haemophilus	1	0.582952	1	1	NA	0.648076	1	1	1	0.0763004	1	1	1	0.129155	1	1	0.82422	1	1	1	1	1	0.0999781	1	1	0.660426	1
Granulicatella	5.4373e-07	6.91434e-05	0.035896	0.757705	1	NA	1	5.07194e-10	1	1	0.0738488	0.328423	1	1	1	1	1	1	0.229738	1	0.16565	0.000604179	0.916844	1	1	1	1
Neisseria	1	1	0.319197	1	1	1	NA	1	1	0.0297093	0.589571	1	0.117198	0.15136	0.626277	0.645595	1	1	0.229738	0.0360187	0.175604	1	0.3475	0.00218458	0.820497	0.00654672	0.000458301
Porphyromonas	2.76657e-09	8.91411e-07	0.0525732	1	1	5.07194e-10	1	NA	0.56138	1	0.589571	0.000898349	0.154761	1	1	1	1	1	1	1	0.451943	0.00928253	1	1	1	1	1
Campylobacter	0.000430698	3.21488e-05	3.52653e-05	0.801972	1	1	1	0.599281	NA	1	0.52057	0.000298876	1.6452e-05	1	2.27217e-07	0.103091	1	1	1	0.0360187	1	1	1	1	1	1	1
Bergeyella	1	1	1	1	0.203468	1	0.00742731	1	1	NA	1	0.631383	0.0354394	0.0307784	1	0.0567334	1	1	0.333357	0.791844	0.451943	0.602462	0.135992	0.135411	1	0.0505347	1
Actinomyces	1	0.582952	0.89951	1	1	0.0738488	0.668181	0.896796	0.648013	1	NA	0.550989	0.000506073	1	0.513436	5.67869e-06	1	1	0.00147846	0.00232778	0.239177	1	1	0.364229	0.820497	0.0505347	0.0181798
Fusobacterium	7.81978e-05	4.9523e-05	0.0646633	1	1	0.340185	1	0.00134752	0.000179325	0.683998	0.52057	NA	0.000301995	1	0.0116453	0.0011588	1	0.0840368	1	1	0.451943	1	1	1	1	1	1
Capnocytophaga	0.00185107	1	0.0692766	1	1	1	0.156264	0.309523	2.1076e-05	0.0763004	0.00147846	0.000377494	NA	1	2.46779e-05	1.27056e-06	0.0664688	1	0.534362	0.000783054	0.844952	1	1	0.407722	0.327369	0.50121	0.417175
c_Gammaproteobacteria_Unclassified_1	1	1	0.00846928	1	0.203468	1	0.108114	1	1	0.0461675	1	1	1	NA	1	1	1	1	1	1	0.490279	1	0	1	1	0.44988	1
Selenomonas	0.0725354	0.389317	0.0324886	1	1	1	0.654208	1	2.27217e-07	1	0.52057	0.00665447	1.6452e-05	1	NA	0.00284914	0.0902673	1	1	0.03691	1	1	0.3475	1	0.820497	1	1
Leptotrichia	0.124127	1	0.0692766	1	1	1	0.685945	1	0.167522	0.0763004	1.13574e-05	0.000898349	1.27056e-06	1	0.00474857	NA	0.37389	1	0.775578	0.00182806	0.16565	1	1	0.870942	0.254326	0.44988	0.0986724
c_Betaproteobacteria_Unclassified_2	1	1	1	0.796672	0.82422	1	1	1	1	1	0.589571	0.637144	0.0083086	1	0.0361069	0.10197	NA	1	1	0.583634	1	1	1	1	1	1	1
c_Tm7_phylum_sp._oral_clone_fr058_Candidate_division_tm7	0.222623	0.0747482	1	0.757705	1	1	1	1	1	1	1	0.0105046	1	1	1	1	1	NA	1	0.964279	1	1	1	0.278426	1	1	1
Rothia	1	0.0940453	0.538831	1	1	0.164905	0.156264	1	1	0.259278	0.00147846	1	0.267181	1	1	0.544308	1	1	NA	1	1	1	0.916844	5.57651e-07	0.973227	2.02673e-10	1
Kingella	0.13796	1	0.0308732	1	1	1	0.0324788	1	0.0269469	0.852755	0.00174584	1	0.000195763	1	0.0371298	0.0011588	1	1	1	NA	0.451943	0.952342	1	1	0.254326	1	0.442823
c_Bacilli_Unclassified_1	0.483406	1	0.31109	0.757705	1	0.053844	0.0878022	0.419111	1	0.470836	0.119588	0.328423	0.79801	0.980558	1	0.0552167	1	1	1	0.274297	NA	1	0.898049	0.483123	1	0.49527	1
Lactobacillus	0.00185515	4.9523e-05	1.18699e-05	1	1	0.000453134	1	0.00928253	1	0.361477	1	1	1	1	1	1	1	1	1	0.586057	1	NA	0.529195	1	1	0.672961	1
Actinobacillus	1	0.72976	0.00126947	1	0.203468	0.916844	0.24325	1	1	0.0763004	0.89951	1	1	0	0.239401	1	1	1	0.775578	1	0.53883	0.604794	NA	1	1	0.195171	1
c_Betaproteobacteria_Unclassified_1	1	1	1	0.757705	1	1	0.00327687	1	1	0.0763004	0.283289	1	0.244633	1	1	0.598773	1	0.556853	5.42576e-07	1	0.451943	1	1	NA	1	5.57651e-07	0.442823
c_Actinobacteria_Unclassified_1	1	1	1	1	1	1	0.469315	1	0.783632	1	0.52057	1	0.0892823	1	0.424613	0.0567334	1	1	0.775578	0.0386251	1	1	1	1	NA	0.76269	0.442823
k_Bacteria_Unclassified	1	0.49527	0.791957	1	1	1	0.00654672	1	1	0.0763004	0.0505347	1	0.353796	0.674819	1	0.268747	1	1	2.02673e-10	1	0.451943	1	0.273239	5.57651e-07	1	NA	0.0516378
Derxia	1	1	1	1	1	1	0.000458301	1	1	1	0.00727193	1	0.154761	1	1	0.0563842	1	1	0.775578	0.274297	0.844952	1	1	0.407722	0.778626	0.0387284	NA

## Sheet: Supplementary Table 2c (AN)
Correlation Weight (r)	Propionibacterium	Staphylococcus	Dolosigranulum	Corynebacterium	Streptococcus	Anaerococcus	Moraxella	c_Betaproteobacteria_Unclassified_1	Prevotella	Finegoldia	c_Clostridia_Incertae_sedis	Pelomonas	Veillonella	Actinomyces	Bacteroides	Campylobacter	Neisseria	c_Gammaproteobacteria_Unclassified_1	Rothia	Granulicatella	Enterobacter	Lactobacillus	Gemella	Mitochondria	Barnesiella	Ralstonia	c_Clostridia_Unclassified_1	Parabacteroides	k_Bacteria_Unclassified	Dialister	Porphyromonas
Propionibacterium	1	-0.423478	-0.313416	-0.0270304	-0.188404	0.0345226	0.037612	0.0141751	-0.0940345	0.139877	0.207657	0.322814	-0.0727605	-0.142092	0.21309	-0.111433	-0.140532	-0.193183	-0.0394499	-0.118372	-0.194473	-0.14652	-0.103016	0.0277648	0.0182869	0.305652	-0.198973	0.108717	-0.11243	0.0246362	-0.290086
Staphylococcus	-0.423478	1	-0.255895	-0.184622	0.273873	0.125532	-0.334624	-0.133481	0.10703	-0.173264	-0.113167	-0.00886384	0.0421639	0.0714527	-0.179442	-0.0202532	0.134094	-0.0666417	0.221455	0.0432209	0.0346713	0.214365	-0.0770704	-0.0624867	-0.247965	0.0154379	0.00632955	0.0176219	0.259365	0.0329725	0.227257
Dolosigranulum	-0.313416	-0.255895	1	-0.0575402	-0.23105	-0.217821	0.242934	-0.155039	-0.197383	-0.117753	-0.209192	-0.24703	-0.179301	-0.0174042	-0.0779148	-0.216034	-0.070801	-0.102716	-0.228837	-0.00427386	-0.184898	-0.0236459	0.0651901	0.0526733	0.0206866	-0.141027	-0.15559	-0.114565	-0.124798	-0.0814907	-0.018893
Corynebacterium	-0.0270304	-0.184622	-0.0575402	1	-0.174015	-0.17104	0.131202	0.119098	-0.0211466	-0.0308401	-0.0743959	0.118975	-0.0431813	-0.101873	-0.0827639	-0.024888	0.0965173	0.0827948	0.00819218	-0.0415894	0.126921	-0.389278	-0.100022	-0.0915569	0.0886902	-0.0431582	0.0819798	0.144891	0.0955722	-0.240319	-0.192963
Streptococcus	-0.188404	0.273873	-0.23105	-0.174015	1	0.198706	-0.307603	0.281233	0.35809	0.125101	0.0362737	0.0433173	0.59597	0.569143	-0.287406	0.26253	0.672698	0.216881	0.584999	0.582653	0.0702294	0.310968	0.647651	0.132862	-0.0375231	-0.076741	0.123315	-0.143232	0.348414	-0.0160044	0.559597
Anaerococcus	0.0345226	0.125532	-0.217821	-0.17104	0.198706	1	-0.120432	0.116748	0.227006	0.569294	0.0147772	0.143571	0.175798	0.133513	0.00801911	0.02058	0.058945	0.0486718	0.17356	0.0666826	-0.0253895	0.162879	0.125496	-0.159118	-0.00810337	0.125455	-0.071744	-0.176197	0.237504	0.199795	0.290199
Moraxella	0.037612	-0.334624	0.242934	0.131202	-0.307603	-0.120432	1	0.0392583	-0.0206989	-0.045284	-0.170121	-0.169358	-0.249585	-0.108449	0.0918722	0.0167375	-0.162633	0.0397627	-0.240761	-0.144465	-0.0458957	-0.191429	-0.167272	0.180826	0.0753576	-0.0752261	-0.0676823	-0.0514082	-0.0678783	0.0589449	-0.203425
c_Betaproteobacteria_Unclassified_1	0.0141751	-0.133481	-0.155039	0.119098	0.281233	0.116748	0.0392583	1	0.231051	0.0424111	-0.268228	-0.0543422	0.224492	0.264399	-0.192057	0.198217	0.321992	0.0385413	0.494121	0.136385	0.0545008	-0.302414	0.167972	0.0429146	0.0843846	-0.263502	0.05927	-0.267998	0.376282	-0.304451	0.31535
Prevotella	-0.0940345	0.10703	-0.197383	-0.0211466	0.35809	0.227006	-0.0206989	0.231051	1	0.285104	0.100998	-0.08648	0.45627	0.435885	-0.0435001	0.320762	0.246188	0.0725357	0.298538	0.425237	0.185584	0.115082	0.294512	-0.103611	-0.112821	-0.0702711	0.181918	-0.0118314	0.21878	0.399925	0.427245
Finegoldia	0.139877	-0.173264	-0.117753	-0.0308401	0.125101	0.569294	-0.045284	0.0424111	0.285104	1	0.0709742	0.0548964	0.11394	0.172785	0.171026	0.31272	0.0758176	0.252366	0.0882742	0.177831	0.254895	0.089873	0.110267	-0.0304303	0.116676	-0.150054	-0.0203963	0.0264042	0.0834338	0.392073	0.142403
c_Clostridia_Incertae_sedis	0.207657	-0.113167	-0.209192	-0.0743959	0.0362737	0.0147772	-0.170121	-0.268228	0.100998	0.0709742	1	0.217368	0.175925	-0.046245	0.457397	-0.0680793	-0.107309	0.109087	-0.14926	-0.0695428	0.255752	0.206216	-0.036532	-0.0269207	0.159014	0.112468	0.318101	0.331492	-0.210011	0.303329	-0.153004
Pelomonas	0.322814	-0.00886384	-0.24703	0.118975	0.0433173	0.143571	-0.169358	-0.0543422	-0.08648	0.0548964	0.217368	1	0.175073	0.0546447	-0.0194485	-0.179562	0.0344847	-0.0771381	-0.00850227	-0.244283	0.0344684	0.193892	-0.0366988	-0.0672802	0.109851	0.574623	-0.0643785	-0.0419854	-0.175472	-0.0599871	-0.159138
Veillonella	-0.0727605	0.0421639	-0.179301	-0.0431813	0.59597	0.175798	-0.249585	0.224492	0.45627	0.11394	0.175925	0.175073	1	0.575168	-0.251221	0.227629	0.525818	-0.00450521	0.365164	0.466452	0.0771854	0.196051	0.551656	0.0417985	0.0008627	-0.0585989	0.109786	-0.0998371	0.0716007	0.0894204	0.467007
Actinomyces	-0.142092	0.0714527	-0.0174042	-0.101873	0.569143	0.133513	-0.108449	0.264399	0.435885	0.172785	-0.046245	0.0546447	0.575168	1	-0.219311	0.112241	0.645656	0.100826	0.556034	0.404177	0.120776	0.169483	0.486131	-0.0619125	0.0123201	-0.163052	0.126536	-0.252413	0.134201	0.150064	0.454203
Bacteroides	0.21309	-0.179442	-0.0779148	-0.0827639	-0.287406	0.00801911	0.0918722	-0.192057	-0.0435001	0.171026	0.457397	-0.0194485	-0.251221	-0.219311	1	-0.109186	-0.223212	0.0957486	-0.119489	-0.146271	0.2004	-0.0444718	-0.293545	0.0609256	0.261204	-0.0608856	0.428575	0.559897	-0.150538	0.365508	-0.192604
Campylobacter	-0.111433	-0.0202532	-0.216034	-0.024888	0.26253	0.02058	0.0167375	0.198217	0.320762	0.31272	-0.0680793	-0.179562	0.227629	0.112241	-0.109186	1	0.107553	0.120831	0.192452	0.0957996	0.162564	-0.0433494	0.114898	0.0668925	-0.12743	-0.286355	0.109388	-0.0795207	0.0379683	0.103472	0.211985
Neisseria	-0.140532	0.134094	-0.070801	0.0965173	0.672698	0.058945	-0.162633	0.321992	0.246188	0.0758176	-0.107309	0.0344847	0.525818	0.645656	-0.223212	0.107553	1	0.209452	0.619726	0.486028	0.110723	0.112996	0.451547	0.128644	0.0406478	-0.173595	0.326233	-0.0469637	0.274888	0.0844662	0.407887
c_Gammaproteobacteria_Unclassified_1	-0.193183	-0.0666417	-0.102716	0.0827948	0.216881	0.0486718	0.0397627	0.0385413	0.0725357	0.252366	0.109087	-0.0771381	-0.00450521	0.100826	0.0957486	0.120831	0.209452	1	-0.0933646	0.181036	0.612842	0.202507	0.133039	0.172261	0.10839	-0.156032	0.240395	0.0577277	0.122027	0.0536901	0.0382814
Rothia	-0.0394499	0.221455	-0.228837	0.00819218	0.584999	0.17356	-0.240761	0.494121	0.298538	0.0882742	-0.14926	-0.00850227	0.365164	0.556034	-0.119489	0.192452	0.619726	-0.0933646	1	0.423169	-0.0882326	0.0377434	0.396532	-0.00655999	0.0699422	-0.180466	0.132132	-0.171068	0.4132	0.0941031	0.5036
Granulicatella	-0.118372	0.0432209	-0.00427386	-0.0415894	0.582653	0.0666826	-0.144465	0.136385	0.425237	0.177831	-0.0695428	-0.244283	0.466452	0.404177	-0.146271	0.0957996	0.486028	0.181036	0.423169	1	0.00669521	0.0390576	0.600212	0.123075	0.113104	-0.216544	0.143154	0.0835171	0.364674	0.0307843	0.437179
Enterobacter	-0.194473	0.0346713	-0.184898	0.126921	0.0702294	-0.0253895	-0.0458957	0.0545008	0.185584	0.254895	0.255752	0.0344684	0.0771854	0.120776	0.2004	0.162564	0.110723	0.612842	-0.0882326	0.00669521	1	0.0965005	-0.0704719	0.0842298	0.0474355	-0.094003	0.35588	0.0469924	0.02072	0.237669	-0.040252
Lactobacillus	-0.14652	0.214365	-0.0236459	-0.389278	0.310968	0.162879	-0.191429	-0.302414	0.115082	0.089873	0.206216	0.193892	0.196051	0.169483	-0.0444718	-0.0433494	0.112996	0.202507	0.0377434	0.0390576	0.0965005	1	0.183586	-0.0834182	-0.0954767	0.204108	-0.00396314	-0.139392	-0.160499	0.268461	0.154313
Gemella	-0.103016	-0.0770704	0.0651901	-0.100022	0.647651	0.125496	-0.167272	0.167972	0.294512	0.110267	-0.036532	-0.0366988	0.551656	0.486131	-0.293545	0.114898	0.451547	0.133039	0.396532	0.600212	-0.0704719	0.183586	1	0.20109	0.1214	-0.112162	-0.0345527	-0.236129	0.140099	-0.047275	0.499707
Mitochondria	0.0277648	-0.0624867	0.0526733	-0.0915569	0.132862	-0.159118	0.180826	0.0429146	-0.103611	-0.0304303	-0.0269207	-0.0672802	0.0417985	-0.0619125	0.0609256	0.0668925	0.128644	0.172261	-0.00655999	0.123075	0.0842298	-0.0834182	0.20109	1	0.0466982	-0.140317	0.123187	0.0492351	0.163488	0.0360346	-0.127292
Barnesiella	0.0182869	-0.247965	0.0206866	0.0886902	-0.0375231	-0.00810337	0.0753576	0.0843846	-0.112821	0.116676	0.159014	0.109851	0.0008627	0.0123201	0.261204	-0.12743	0.0406478	0.10839	0.0699422	0.113104	0.0474355	-0.0954767	0.1214	0.0466982	1	-0.130086	0.270754	0.201288	0.077857	0.0847575	0.0786083
Ralstonia	0.305652	0.0154379	-0.141027	-0.0431582	-0.076741	0.125455	-0.0752261	-0.263502	-0.0702711	-0.150054	0.112468	0.574623	-0.0585989	-0.163052	-0.0608856	-0.286355	-0.173595	-0.156032	-0.180466	-0.216544	-0.094003	0.204108	-0.112162	-0.140317	-0.130086	1	-0.222607	-0.12436	-0.215884	0.072402	-0.252585
c_Clostridia_Unclassified_1	-0.198973	0.00632955	-0.15559	0.0819798	0.123315	-0.071744	-0.0676823	0.05927	0.181918	-0.0203963	0.318101	-0.0643785	0.109786	0.126536	0.428575	0.109388	0.326233	0.240395	0.132132	0.143154	0.35588	-0.00396314	-0.0345527	0.123187	0.270754	-0.222607	1	0.403499	0.0324177	0.310735	-0.104444
Parabacteroides	0.108717	0.0176219	-0.114565	0.144891	-0.143232	-0.176197	-0.0514082	-0.267998	-0.0118314	0.0264042	0.331492	-0.0419854	-0.0998371	-0.252413	0.559897	-0.0795207	-0.0469637	0.0577277	-0.171068	0.0835171	0.0469924	-0.139392	-0.236129	0.0492351	0.201288	-0.12436	0.403499	1	-0.0269649	0.133255	-0.149396
k_Bacteria_Unclassified	-0.11243	0.259365	-0.124798	0.0955722	0.348414	0.237504	-0.0678783	0.376282	0.21878	0.0834338	-0.210011	-0.175472	0.0716007	0.134201	-0.150538	0.0379683	0.274888	0.122027	0.4132	0.364674	0.02072	-0.160499	0.140099	0.163488	0.077857	-0.215884	0.0324177	-0.0269649	1	0.0207939	0.270337
Dialister	0.0246362	0.0329725	-0.0814907	-0.240319	-0.0160044	0.199795	0.0589449	-0.304451	0.399925	0.392073	0.303329	-0.0599871	0.0894204	0.150064	0.365508	0.103472	0.0844662	0.0536901	0.0941031	0.0307843	0.237669	0.268461	-0.047275	0.0360346	0.0847575	0.072402	0.310735	0.133255	0.0207939	1	-0.00863676
Porphyromonas	-0.290086	0.227257	-0.018893	-0.192963	0.559597	0.290199	-0.203425	0.31535	0.427245	0.142403	-0.153004	-0.159138	0.467007	0.454203	-0.192604	0.211985	0.407887	0.0382814	0.5036	0.437179	-0.040252	0.154313	0.499707	-0.127292	0.0786083	-0.252585	-0.104444	-0.149396	0.270337	-0.00863676	1
Benjamini-Hochberg-Yekutieli P-adjust	Propionibacterium	Staphylococcus	Dolosigranulum	Corynebacterium	Streptococcus	Anaerococcus	Moraxella	c_Betaproteobacteria_Unclassified_1	Prevotella	Finegoldia	c_Clostridia_Incertae_sedis	Pelomonas	Veillonella	Actinomyces	Bacteroides	Campylobacter	Neisseria	c_Gammaproteobacteria_Unclassified_1	Rothia	Granulicatella	Enterobacter	Lactobacillus	Gemella	Mitochondria	Barnesiella	Ralstonia	c_Clostridia_Unclassified_1	Parabacteroides	k_Bacteria_Unclassified	Dialister	Porphyromonas
Propionibacterium	NA	0.110919	1	1	0.988316	1	1	1	1	1	1	0.80622	1	1	1	1	1	1	1	1	1	1	1	1	1	1	1	1	1	1	0.296179
Staphylococcus	0.110919	NA	1	1	0.321003	1	1	1	1	1	1	1	1	1	1	1	1	1	0.873891	1	1	1	1	1	1	1	1	1	0.84395	1	0.738246
Dolosigranulum	0.588322	1	NA	1	0.606603	1	1	1	1	1	1	1	1	1	1	1	1	1	0.839106	1	1	1	1	1	1	1	1	1	1	1	1
Corynebacterium	1	1	1	NA	1	1	1	1	1	1	1	1	1	1	1	1	1	1	1	1	1	0.302722	1	1	1	1	1	1	1	0.964393	0.981953
Streptococcus	1	1	1	1	NA	1	1	0.497443	0.115481	1	1	1	9.56954e-05	0.000125205	0.573323	1	8.75662e-07	1	8.49472e-05	9.57842e-05	1	0.840491	4.68663e-06	1	1	1	1	1	0.220442	1	0.000593868
Anaerococcus	1	1	1	1	0.897764	NA	1	1	0.798336	0.000372858	1	1	1	1	1	1	1	1	1	1	1	1	1	1	1	1	1	1	1	1	0.296179
Moraxella	1	0.613978	1	1	0.205147	1	NA	1	1	1	1	1	0.705126	1	1	1	1	1	0.748252	1	1	1	1	1	1	1	1	1	1	1	0.941025
c_Betaproteobacteria_Unclassified_1	1	1	1	1	0.299367	1	1	NA	0.798336	1	1	1	0.901214	0.597878	1	1	0.182521	1	0.00193683	1	1	0.840491	1	1	1	1	1	1	0.195201	0.412156	0.211718
Prevotella	1	1	1	1	0.0866107	1	1	0.808793	NA	0.900749	1	1	0.00545463	0.0107177	1	1	0.680738	1	0.273605	0.0159977	1	1	0.337231	1	1	1	1	1	1	0.13998	0.0140937
Finegoldia	1	1	1	1	1	0.000372858	1	1	0.3603	NA	1	1	1	1	1	1	1	1	1	1	1	1	1	1	1	1	1	1	1	0.13998	1
c_Clostridia_Incertae_sedis	1	1	1	1	1	1	1	0.497443	1	1	NA	1	1	1	0.0183683	1	1	1	1	1	1	1	1	1	1	1	0.351425	0.440413	1	0.412156	1
Pelomonas	0.588322	1	1	1	1	1	1	1	1	1	1	NA	1	1	1	1	1	1	1	0.774232	1	1	1	1	1	0.000286872	1	1	1	1	1
Veillonella	1	1	1	1	3.18985e-05	1	1	0.83189	0.0262582	1	1	1	NA	0.000125205	0.856058	1	0.000673564	1	0.0642482	0.00670328	1	1	0.000286696	1	1	1	1	1	1	1	0.0065732
Actinomyces	1	1	1	1	6.26026e-05	1	1	0.497443	0.0262582	1	1	1	0.000139607	NA	1	1	2.66063e-06	1	0.000234012	0.0247514	1	1	0.0026225	1	1	1	1	1	1	1	0.00819353
Bacteroides	1	1	1	1	0.286661	1	1	1	1	1	0.0367366	1	0.705126	1	NA	1	0.920176	1	1	1	1	1	0.337231	1	1	1	0.0946296	0.0005855	1	0.19104	0.981953
Campylobacter	1	1	1	1	0.371454	1	1	1	0.241267	0.673011	1	1	0.901214	1	1	NA	1	1	1	1	1	1	1	1	1	1	1	1	1	1	0.880136
Neisseria	1	1	1	1	8.75662e-07	1	1	0.420245	0.680738	1	1	1	0.000673564	5.32126e-06	1	1	NA	1	2.55923e-05	0.00438769	1	1	0.00746984	1	1	1	0.351425	1	0.801627	1	0.0222003
c_Gammaproteobacteria_Unclassified_1	1	1	1	1	0.719014	1	1	1	1	1	1	1	1	1	1	1	1	NA	1	1	3.79276e-05	1	1	1	1	1	1	1	1	1	1
Rothia	1	1	1	1	3.83137e-05	1	1	0.00968414	0.330562	1	1	1	0.0722793	0.000175509	1	1	8.53077e-06	1	NA	0.0159977	1	1	0.0352567	1	1	1	1	1	0.151661	1	0.00259997
Granulicatella	1	1	1	1	3.83137e-05	1	1	1	0.0262582	1	1	1	0.00446885	0.0247514	1	1	0.00263261	1	0.018664	NA	1	1	3.81043e-05	1	1	1	1	1	0.195201	1	0.0119941
Enterobacter	1	1	1	1	1	1	1	1	1	1	1	1	1	1	1	1	1	3.79276e-05	1	1	NA	1	1	1	1	1	0.244191	1	1	0.964393	1
Lactobacillus	1	1	1	0.302722	0.205147	1	1	0.420245	1	1	1	1	1	1	1	1	1	1	1	1	1	NA	1	1	1	1	1	1	1	0.712068	1
Gemella	1	1	1	1	2.34331e-06	1	1	1	0.330562	1	1	1	0.000286696	0.0026225	0.573323	1	0.00746984	1	0.0308496	7.62086e-05	1	1	NA	1	1	1	1	1	1	1	0.00259997
Mitochondria	1	1	1	1	1	1	1	1	1	1	1	1	1	1	1	1	1	1	1	1	1	1	1	NA	1	1	1	1	1	1	1
Barnesiella	1	1	1	1	1	1	1	1	1	1	1	1	1	1	0.815791	1	1	1	1	1	1	1	1	1	NA	1	0.681648	1	1	1	1
Ralstonia	0.588322	1	1	1	1	1	1	0.497443	1	1	1	0.000286872	1	1	1	1	1	1	1	1	1	1	1	1	1	NA	1	1	1	1	0.514073
c_Clostridia_Unclassified_1	1	1	1	1	1	1	1	1	1	1	0.59752	1	1	1	0.0315432	1	0.182521	1	1	1	0.366287	1	1	1	1	1	NA	0.100977	1	0.412156	1
Parabacteroides	1	1	1	1	1	1	1	0.497443	1	1	0.59752	1	1	0.670361	0.0005855	1	1	1	1	1	1	1	0.891025	1	1	1	0.100977	NA	1	1	1
k_Bacteria_Unclassified	1	1	1	1	0.0979741	1	1	0.215814	0.847089	1	1	1	1	1	1	1	0.440664	1	0.0216659	0.065067	1	1	1	1	1	1	1	1	NA	1	0.400814
Dialister	1	1	1	1	1	1	1	0.420245	0.0447908	0.13998	0.618234	1	1	1	0.14328	1	1	1	1	1	1	1	1	1	1	1	0.351425	1	1	NA	1
Porphyromonas	0.651594	1	1	1	8.48383e-05	1	1	0.420245	0.0262582	1	1	1	0.00446885	0.00682794	1	1	0.0253718	1	0.00167325	0.0143929	1	1	0.00194998	1	1	1	1	1	0.801627	1	NA

## Sheet: Supplementary_Table_2d (BE)
Correlation Weight (r)	Haemophilus	Pseudomonas	Streptococcus	Veillonella	Prevotella	Stenotrophomonas	Fusobacterium	Achromobacter	Porphyromonas	Serratia	c_Betaproteobacteria_Unclassified_2	Neisseria	Granulicatella	Leptotrichia	Campylobacter	Gemella	Megasphaera
Haemophilus	1	-0.385806	-0.184252	-0.314218	-0.390045	-0.293939	-0.49802	-0.281011	-0.173766	-0.224908	-0.436309	-0.0582005	-0.104282	-0.214689	-0.444265	-0.175983	-0.0931046
Pseudomonas	-0.385806	1	-0.0556038	-0.00355667	0.0803251	0.0266807	0.0979894	0.211963	-0.264714	-0.188122	-0.149289	-0.130954	-0.109393	-0.0158605	0.00870702	-0.227458	-0.00132169
Streptococcus	-0.184252	-0.0556038	1	0.726775	0.542935	-0.183421	0.508926	-0.226667	0.456895	-0.0532512	0.151897	0.312014	0.746962	0.519488	0.410887	0.755544	0.535363
Veillonella	-0.314218	-0.00355667	0.726775	1	0.865605	-0.183578	0.581146	-0.186826	0.345873	0.0688417	0.197998	0.309433	0.68355	0.689898	0.676996	0.66879	0.749284
Prevotella	-0.390045	0.0803251	0.542935	0.865605	1	-0.0185027	0.768548	-0.0133425	0.406093	0.162823	0.337063	0.361358	0.592194	0.681127	0.75178	0.608204	0.643884
Stenotrophomonas	-0.293939	0.0266807	-0.183421	-0.183578	-0.0185027	1	0.0215295	-0.0576888	-0.317024	-0.0832	-0.203961	-0.165476	-0.228879	-0.191918	-0.173193	-0.220652	-0.0985922
Fusobacterium	-0.49802	0.0979894	0.508926	0.581146	0.768548	0.0215295	1	0.227524	0.652044	0.244991	0.557107	0.40426	0.445348	0.429279	0.598788	0.525586	0.396712
Achromobacter	-0.281011	0.211963	-0.226667	-0.186826	-0.0133425	-0.0576888	0.227524	1	0.0686927	-0.0576888	0.36141	-0.208128	-0.147603	0.0674436	0.176094	-0.0953599	-0.196708
Porphyromonas	-0.173766	-0.264714	0.456895	0.345873	0.406093	-0.317024	0.652044	0.0686927	1	0.332266	0.63062	0.552813	0.420815	0.307909	0.40888	0.568493	0.106169
Serratia	-0.224908	-0.188122	-0.0532512	0.0688417	0.162823	-0.0832	0.244991	-0.0576888	0.332266	1	0.4685	0.442553	0.129884	0.310511	0.163801	0.247478	-0.0837839
c_Betaproteobacteria_Unclassified_2	-0.436309	-0.149289	0.151897	0.197998	0.337063	-0.203961	0.557107	0.36141	0.63062	0.4685	1	0.569388	0.137661	0.385595	0.472159	0.284456	0.126526
Neisseria	-0.0582005	-0.130954	0.312014	0.309433	0.361358	-0.165476	0.40426	-0.208128	0.552813	0.442553	0.569388	1	0.330477	0.426506	0.378429	0.391852	0.191205
Granulicatella	-0.104282	-0.109393	0.746962	0.68355	0.592194	-0.228879	0.445348	-0.147603	0.420815	0.129884	0.137661	0.330477	1	0.553436	0.351991	0.885866	0.624892
Leptotrichia	-0.214689	-0.0158605	0.519488	0.689898	0.681127	-0.191918	0.429279	0.0674436	0.307909	0.310511	0.385595	0.426506	0.553436	1	0.716626	0.576177	0.576044
Campylobacter	-0.444265	0.00870702	0.410887	0.676996	0.75178	-0.173193	0.598788	0.176094	0.40888	0.163801	0.472159	0.378429	0.351991	0.716626	1	0.401355	0.373147
Gemella	-0.175983	-0.227458	0.755544	0.66879	0.608204	-0.220652	0.525586	-0.0953599	0.568493	0.247478	0.284456	0.391852	0.885866	0.576177	0.401355	1	0.521956
Megasphaera	-0.0931046	-0.00132169	0.535363	0.749284	0.643884	-0.0985922	0.396712	-0.196708	0.106169	-0.0837839	0.126526	0.191205	0.624892	0.576044	0.373147	0.521956	1
Benjamini-Hochberg-Yekutieli P-adjust	Haemophilus	Pseudomonas	Streptococcus	Veillonella	Prevotella	Stenotrophomonas	Fusobacterium	Achromobacter	Porphyromonas	Serratia	c_Betaproteobacteria_Unclassified_2	Neisseria	Granulicatella	Leptotrichia	Campylobacter	Gemella	Megasphaera
Haemophilus	NA	1	1	0.609712	0.264269	1	0.0650586	1	1	1	0.233112	1	1	1	0.207179	1	1
Pseudomonas	0.558037	NA	1	1	1	1	1	1	0.79582	1	1	1	1	1	1	1	1
Streptococcus	1	1	NA	0.000471086	0.0281039	1	0.06126	1	0.20503	1	1	0.609712	0.000315746	0.0504782	0.253218	0.000219126	0.0522178
Veillonella	1	1	0.000471086	NA	6.13923e-07	1	0.0250108	1	0.501824	1	1	0.609712	0.0021355	0.00230714	0.0026279	0.00338333	0.000572878
Prevotella	0.558037	1	0.0522178	6.13923e-07	NA	1	0.000244778	1	0.267361	1	0.554204	0.471328	0.0155389	0.00230714	0.000515313	0.013246	0.0104467
Stenotrophomonas	1	1	1	1	1	NA	1	1	0.563335	1	1	1	1	1	1	1	1
Fusobacterium	0.466225	1	0.06126	0.0125054	0.000122389	1	NA	1	0.0149624	1	0.0561217	0.430281	0.174717	0.179075	0.0166306	0.0421781	0.346165
Achromobacter	1	1	1	1	1	1	1	NA	1	1	0.471037	1	1	1	1	1	1
Porphyromonas	1	1	0.128144	0.501824	0.237655	1	0.00830492	1	NA	1	0.0299247	0.0920152	0.218353	0.567736	0.253218	0.0220369	1
Serratia	1	1	1	1	1	1	0.947499	1	0.525962	NA	0.170695	0.40292	1	0.567736	1	1	1
c_Betaproteobacteria_Unclassified_2	0.466225	1	1	1	0.415653	1	0.033673	1	0.0149624	0.637648	NA	0.0920152	1	0.279771	0.160906	0.781928	1
Neisseria	1	1	0.653003	0.609712	0.342784	1	0.199296	1	0.0460076	0.637648	0.0561217	NA	0.536376	0.179075	0.29721	0.258168	1
Granulicatella	1	1	0.000315746	0.0012813	0.0110992	1	0.135891	1	0.267361	1	1	0.595973	NA	0.0302806	0.350791	9.63213e-08	0.0115908
Leptotrichia	1	1	0.0588912	0.0012813	0.00173036	1	0.154894	1	0.567736	1	0.399673	0.40292	0.0302806	NA	0.00103246	0.0220369	0.0280251
Campylobacter	0.466225	1	0.222694	0.00131395	0.000171771	1	0.0221741	1	0.267361	1	0.170695	0.437454	0.467721	0.00206492	NA	0.253218	0.408663
Gemella	1	1	0.000315746	0.00145	0.00883069	1	0.0525175	1	0.0440737	1	0.860121	0.430281	9.63213e-08	0.0224201	0.253218	NA	0.0562374
Megasphaera	1	1	0.0522178	0.000286439	0.00417868	1	0.201929	1	1	1	1	1	0.00869308	0.0224201	0.29721	0.0421781	NA

## Sheet: Supplementary_Table_2e (CF)
Correlation Weight (r)	Pseudomonas	Burkholderia	Streptococcus	Prevotella	Haemophilus	Veillonella	Rothia	Fusobacterium	Staphylococcus	Stenotrophomonas	Achromobacter	Porphyromonas	Granulicatella	Gemella	Capnocytophaga	Devosia	Actinomyces	Neisseria	c_Bacilli_Unclassified_1	Oribacterium	Leptotrichia	Atopobium	Megasphaera	Planomicrobium	Parvimonas	Serratia	Aquabacterium	Lactobacillus	Moryella	Lysinibacillus	c_Actinobacteria_Unclassified_1
Pseudomonas	1	-0.602972	-0.20515	-0.159791	-0.0838992	-0.101213	0.026342	0.0298088	-0.0400199	-0.0404537	-0.169539	-0.100221	0.0476223	0.0940116	-0.0822148	-0.0670462	-0.16258	-0.0563863	-0.0564047	-0.0708594	0.0348726	-0.111549	-0.128054	-0.0644827	-0.00215755	0.0491633	0.0328517	-0.00991328	-0.110538	-0.0766242	-0.0519797
Burkholderia	-0.602972	1	-0.17338	-0.206634	-0.176536	-0.138816	-0.295533	-0.360745	-0.150962	0.0948284	-0.122672	-0.299252	-0.405685	-0.285572	-0.174096	0.113177	-0.114769	-0.0939637	-0.10571	-0.149129	-0.25423	-0.152465	-0.0292586	0.200044	-0.192242	-0.0170925	0.224045	0.199694	-0.0614672	0.122416	-0.0601881
Streptococcus	-0.20515	-0.17338	1	0.508204	0.203421	0.533682	0.479904	0.304206	0.205417	0.238358	0.124805	0.309239	0.435179	0.339356	0.330567	0.131851	0.504857	0.142674	0.252517	0.260981	0.241461	0.387951	0.18737	0.107173	0.244185	0.0444867	0.13561	0.1082	0.308288	0.154782	0.319812
Prevotella	-0.159791	-0.206634	0.508204	1	0.208054	0.729843	0.435635	0.463783	0.00756467	0.0506082	0.0799711	0.421522	0.337513	0.256477	0.471604	-0.0210546	0.549965	0.20148	0.332233	0.468879	0.360943	0.5685	0.535425	-0.150401	0.286933	0.0376685	-0.00558944	0.027257	0.435147	-0.153124	-0.0049354
Haemophilus	-0.0838992	-0.176536	0.203421	0.208054	1	0.214824	-0.0843841	0.452455	0.0988964	0.0180907	0.178865	0.262581	0.377478	0.688298	0.02399	0.0408723	0.121077	0.532878	-0.0682518	0.322324	0.380722	0.296272	0.367428	-0.136563	0.501134	-0.0255519	-0.211608	-0.141935	0.414488	-0.0960498	-0.179524
Veillonella	-0.101213	-0.138816	0.533682	0.729843	0.214824	1	0.458393	0.314711	0.253519	0.308305	-0.000158783	0.230054	0.374258	0.311238	0.39165	-0.126165	0.578563	0.134227	0.269952	0.546863	0.251603	0.700667	0.508562	-0.115453	0.205565	-0.0333714	0.0400031	0.116355	0.418903	-0.166308	0.0982091
Rothia	0.026342	-0.295533	0.479904	0.435635	-0.0843841	0.458393	1	0.113676	-0.0129912	0.0986221	-0.0290058	0.223001	0.380494	0.123761	0.366098	-0.0784504	0.577168	0.0568705	0.522914	0.178052	0.139536	0.322208	0.0974454	-0.0496781	-0.088348	-0.0626255	0.052386	0.104282	0.163497	0.0076537	0.303181
Fusobacterium	0.0298088	-0.360745	0.304206	0.463783	0.452455	0.314711	0.113676	1	0.107728	-0.0643166	0.0521532	0.423333	0.355739	0.390246	0.340034	-0.112472	0.154292	0.233568	0.0801631	0.390214	0.517062	0.317048	0.31607	-0.159912	0.469033	-0.0238874	-0.131025	-0.155582	0.319876	-0.112472	-0.0901696
Staphylococcus	-0.0400199	-0.150962	0.205417	0.00756467	0.0988964	0.253519	-0.0129912	0.107728	1	0.121991	0.253028	-0.0513093	0.219934	0.192146	0.248346	-0.0534046	0.0743487	0.0482283	-0.103835	0.00800062	-0.02018	0.200027	0.0132972	-0.0759305	0.115842	0.0280488	-0.0603454	0.0771267	0.118029	-0.0534046	0.342544
Stenotrophomonas	-0.0404537	0.0948284	0.238358	0.0506082	0.0180907	0.308305	0.0986221	-0.0643166	0.121991	1	0.153629	-0.0994659	-0.134058	0.0129852	0.0531084	0.207106	0.0638044	-0.108218	-0.06184	0.0503807	-0.0610951	0.14048	0.0570327	0.113844	-0.0066474	0.381202	0.254395	0.262914	0.133702	0.21235	0.286726
Achromobacter	-0.169539	-0.122672	0.124805	0.0799711	0.178865	-0.000158783	-0.0290058	0.0521532	0.253028	0.153629	1	0.199754	0.0377641	0.0641461	0.080713	0.340025	0.0819747	0.000413542	-0.0452262	-0.00731099	0.0191666	-0.0302456	-0.0785834	-0.0417793	0.0889599	0.384712	0.0102353	0.103371	0.0915811	-0.0293849	0.190197
Porphyromonas	-0.100221	-0.299252	0.309239	0.421522	0.262581	0.230054	0.223001	0.423333	-0.0513093	-0.0994659	0.199754	1	0.269924	0.263022	0.536006	-0.105782	0.162393	0.153185	0.257183	0.147724	0.288095	0.101458	0.11124	-0.1504	0.29653	-0.0662412	-0.22903	-0.239128	0.15256	-0.105782	-0.112821
Granulicatella	0.0476223	-0.405685	0.435179	0.337513	0.377478	0.374258	0.380494	0.355739	0.219934	-0.134058	0.0377641	0.269924	1	0.563799	0.137305	-0.13672	0.337644	0.353738	0.343561	0.26729	0.264607	0.387496	0.303105	-0.0887471	0.236248	-0.196654	-0.270661	0.0157017	0.241986	-0.13672	0.0816252
Gemella	0.0940116	-0.285572	0.339356	0.256477	0.688298	0.311238	0.123761	0.390246	0.192146	0.0129852	0.0641461	0.263022	0.563799	1	0.0831798	-0.107451	0.222763	0.478959	0.0669802	0.389586	0.294784	0.35693	0.201341	-0.152773	0.512943	-0.188115	-0.190237	-0.0480013	0.561728	-0.107451	-0.0886475
Capnocytophaga	-0.0822148	-0.174096	0.330567	0.471604	0.02399	0.39165	0.366098	0.340034	0.248346	0.0531084	0.080713	0.536006	0.137305	0.0831798	1	-0.119455	0.210585	-0.0451601	0.179802	0.218212	0.270508	0.147094	0.103308	-0.0761828	0.178045	-0.00187224	-0.0273777	-0.0775936	0.22025	-0.119455	0.122285
Devosia	-0.0670462	0.113177	0.131851	-0.0210546	0.0408723	-0.126165	-0.0784504	-0.112472	-0.0534046	0.207106	0.340025	-0.105782	-0.13672	-0.107451	-0.119455	1	0.00968109	-0.0724163	-0.100941	-0.0896853	0.0727281	-0.0880951	0.0727232	-0.0152881	-0.0467042	0.55847	0.296116	0.194414	-0.0614846	-0.0107527	0.233564
Actinomyces	-0.16258	-0.114769	0.504857	0.549965	0.121077	0.578563	0.577168	0.154292	0.0743487	0.0638044	0.0819747	0.162393	0.337644	0.222763	0.210585	0.00968109	1	0.255604	0.560546	0.255539	0.203166	0.467496	0.409635	-0.0564639	0.0508176	-0.0840226	0.234688	0.18806	0.275905	0.0484055	0.113672
Neisseria	-0.0563863	-0.0939637	0.142674	0.20148	0.532878	0.134227	0.0568705	0.233568	0.0482283	-0.108218	0.000413542	0.153185	0.353738	0.478959	-0.0451601	-0.0724163	0.255604	1	0.0855277	0.19507	0.359531	0.194656	0.317391	-0.102961	0.27066	-0.12678	0.0562111	-0.0466475	0.460456	-0.0724163	-0.155866
c_Bacilli_Unclassified_1	-0.0564047	-0.10571	0.252517	0.332233	-0.0682518	0.269952	0.522914	0.0801631	-0.103835	-0.06184	-0.0452262	0.257183	0.343561	0.0669802	0.179802	-0.100941	0.560546	0.0855277	1	0.0452623	0.173537	0.131536	0.195199	0.0435897	0.0207208	-0.176719	0.138933	0.186681	-0.00564417	0.159487	0.194335
Oribacterium	-0.0708594	-0.149129	0.260981	0.468879	0.322324	0.546863	0.178052	0.390214	0.00800062	0.0503807	-0.00731099	0.147724	0.26729	0.389586	0.218212	-0.0896853	0.255539	0.19507	0.0452623	1	0.313322	0.394168	0.359494	0.0250486	0.183064	-0.0389489	-0.0600068	-0.0882206	0.376427	-0.0896853	-0.0627492
Leptotrichia	0.0348726	-0.25423	0.241461	0.360943	0.380722	0.251603	0.139536	0.517062	-0.02018	-0.0610951	0.0191666	0.288095	0.264607	0.294784	0.270508	0.0727281	0.203166	0.359531	0.173537	0.313322	1	0.283573	0.53414	-0.109672	0.282053	0.0380089	0.0136492	-0.0460646	0.291604	-0.0771359	-0.128262
Atopobium	-0.111549	-0.152465	0.387951	0.5685	0.296272	0.700667	0.322208	0.317048	0.200027	0.14048	-0.0302456	0.101458	0.387496	0.35693	0.147094	-0.0880951	0.467496	0.194656	0.131536	0.394168	0.283573	1	0.504141	-0.125253	0.20799	-0.0293769	-0.0903112	0.0309164	0.372691	-0.0880951	-0.116952
Megasphaera	-0.128054	-0.0292586	0.18737	0.535425	0.367428	0.508562	0.0974454	0.31607	0.0132972	0.0570327	-0.0785834	0.11124	0.303105	0.201341	0.103308	0.0727232	0.409635	0.317391	0.195199	0.359494	0.53414	0.504141	1	-0.109664	0.155263	0.0868756	-0.0381124	-0.0229046	0.29937	-0.0771307	-0.0948732
Planomicrobium	-0.0644827	0.200044	0.107173	-0.150401	-0.136563	-0.115453	-0.0496781	-0.159912	-0.0759305	0.113844	-0.0417793	-0.1504	-0.0887471	-0.152773	-0.0761828	-0.0152881	-0.0564639	-0.102961	0.0435897	0.0250486	-0.109672	-0.125253	-0.109664	1	-0.0664039	-0.0267651	0.169909	0.211199	-0.0874186	0.710898	0.15626
Parvimonas	-0.00215755	-0.192242	0.244185	0.286933	0.501134	0.205565	-0.088348	0.469033	0.115842	-0.0066474	0.0889599	0.29653	0.236248	0.512943	0.178045	-0.0467042	0.0508176	0.27066	0.0207208	0.183064	0.282053	0.20799	0.155263	-0.0664039	1	-0.0817655	-0.179788	0.0290823	0.35812	-0.0467042	-0.0819627
Serratia	0.0491633	-0.0170925	0.0444867	0.0376685	-0.0255519	-0.0333714	-0.0626255	-0.0238874	0.0280488	0.381202	0.384712	-0.0662412	-0.196654	-0.188115	-0.00187224	0.55847	-0.0840226	-0.12678	-0.176719	-0.0389489	0.0380089	-0.0293769	0.0868756	-0.0267651	-0.0817655	1	0.120303	0.0291394	0.0374684	-0.0188248	0.0762845
Aquabacterium	0.0328517	0.224045	0.13561	-0.00558944	-0.211608	0.0400031	0.052386	-0.131025	-0.0603454	0.254395	0.0102353	-0.22903	-0.270661	-0.190237	-0.0273777	0.296116	0.234688	0.0562111	0.138933	-0.0600068	0.0136492	-0.0903112	-0.0381124	0.169909	-0.179788	0.120303	1	0.261285	0.00312224	0.277012	0.277312
Lactobacillus	-0.00991328	0.199694	0.1082	0.027257	-0.141935	0.116355	0.104282	-0.155582	0.0771267	0.262914	0.103371	-0.239128	0.0157017	-0.0480013	-0.0775936	0.194414	0.18806	-0.0466475	0.186681	-0.0882206	-0.0460646	0.0309164	-0.0229046	0.211199	0.0290823	0.0291394	0.261285	1	0.121771	0.187471	0.391417
Moryella	-0.110538	-0.0614672	0.308288	0.435147	0.414488	0.418903	0.163497	0.319876	0.118029	0.133702	0.0915811	0.15256	0.241986	0.561728	0.22025	-0.0614846	0.275905	0.460456	-0.00564417	0.376427	0.291604	0.372691	0.29937	-0.0874186	0.35812	0.0374684	0.00312224	0.121771	1	-0.0614846	-0.0461095
Lysinibacillus	-0.0766242	0.122416	0.154782	-0.153124	-0.0960498	-0.166308	0.0076537	-0.112472	-0.0534046	0.21235	-0.0293849	-0.105782	-0.13672	-0.107451	-0.119455	-0.0107527	0.0484055	-0.0724163	0.159487	-0.0896853	-0.0771359	-0.0880951	-0.0771307	0.710898	-0.0467042	-0.0188248	0.277012	0.187471	-0.0614846	1	0.264895
c_Actinobacteria_Unclassified_1	-0.0519797	-0.0601881	0.319812	-0.0049354	-0.179524	0.0982091	0.303181	-0.0901696	0.342544	0.286726	0.190197	-0.112821	0.0816252	-0.0886475	0.122285	0.233564	0.113672	-0.155866	0.194335	-0.0627492	-0.128262	-0.116952	-0.0948732	0.15626	-0.0819627	0.0762845	0.277312	0.391417	-0.0461095	0.264895	1
Benjamini-Hochberg-Yekutieli P-adjust	Pseudomonas	Burkholderia	Streptococcus	Prevotella	Haemophilus	Veillonella	Rothia	Fusobacterium	Staphylococcus	Stenotrophomonas	Achromobacter	Porphyromonas	Granulicatella	Gemella	Capnocytophaga	Devosia	Actinomyces	Neisseria	c_Bacilli_Unclassified_1	Oribacterium	Leptotrichia	Atopobium	Megasphaera	Planomicrobium	Parvimonas	Serratia	Aquabacterium	Lactobacillus	Moryella	Lysinibacillus	c_Actinobacteria_Unclassified_1
Pseudomonas	NA	1.5199e-08	0.295102	0.74277	1	1	1	1	1	1	1	1	1	1	1	1	0.78479	1	1	1	1	1	1	1	1	1	1	1	1	1	1
Burkholderia	1.5199e-08	NA	0.515832	0.304248	0.590873	1	0.0458998	0.00531096	1	1	1	0.0740472	0.00199001	0.0526381	0.798811	1	1	1	1	1	0.114815	1	1	1	0.58463	1	0.398771	0.858232	1	1	1
Streptococcus	1	0.756554	NA	4.08664e-06	0.39347	7.30333e-07	3.94033e-05	0.0229625	0.911538	0.413392	1	0.0726033	0.00070054	0.0109166	0.0227242	1	5.07164e-06	1	0.240935	0.120557	0.142704	0.00195303	0.603949	1	0.235719	1	1	1	0.0300003	1	0.0669985
Prevotella	1	0.5845	8.45273e-06	NA	0.378334	0	0.000273711	0.00010004	1	1	1	0.000929276	0.00877657	0.107749	9.60572e-05	1	2.81296e-07	0.600278	0.0320567	0.000112348	0.00892568	1.3613e-07	1.76785e-06	1	0.100744	1	1	1	0.000467793	1	1
Haemophilus	1	0.756554	0.295102	0.304248	NA	0.250303	1	0.000140439	1	1	1	0.126615	0.00346507	2.12896e-12	1	1	1	3.86404e-06	1	0.0229753	0.00612942	0.0373378	0.00538332	1	1.60779e-05	1	0.486797	1	0.00078567	1	0.908539
Veillonella	1	1	3.65167e-06	0	0.374459	NA	0.000101385	0.0171744	0.473372	0.149911	1	0.225918	0.00346507	0.0271172	0.00378735	1	6.79944e-08	1	0.203884	1.41487e-06	0.115341	4.52403e-13	6.63731e-06	1	0.467927	1	1	1	0.00078567	1	1
Rothia	1	0.0917996	2.95525e-05	0.000140338	1	5.79342e-05	NA	1	1	1	1	0.245604	0.00346507	1	0.00853188	1	6.79944e-08	1	3.84623e-06	0.644128	1	0.0184572	1	1	1	1	1	1	0.864085	1	0.0891203
Fusobacterium	1	0.0141626	0.0287031	3.75149e-05	0.000140439	0.0218583	1	NA	1	1	1	0.000929276	0.00625338	0.00178	0.0191514	1	0.867938	0.312573	1	0.00249199	5.70471e-06	0.020143	0.0254785	1	7.4241e-05	1	1	1	0.0222817	1	1
Staphylococcus	1	1	0.295102	1	1	0.108132	1	1	NA	1	0.554193	1	0.198801	0.437884	0.236686	1	1	1	1	1	1	0.425385	1	1	1	1	1	1	1	1	0.0435156
Stenotrophomonas	1	1	0.145903	1	1	0.0230633	1	1	1	NA	1	1	0.947703	1	1	1	1	1	1	1	1	1	1	1	1	0.00600346	0.266663	0.438183	1	1	0.12181
Achromobacter	1	1	1	1	0.590873	1	1	1	0.473372	1	NA	0.401288	1	1	1	0.0478961	1	1	1	1	1	1	1	1	1	0.00600346	1	1	1	1	0.795018
Porphyromonas	1	0.0917996	0.027273	0.000253439	0.115105	0.181227	0.334914	0.000509828	1	1	1	NA	0.068018	0.096157	3.09856e-06	1	0.78479	1	0.240935	1	0.06411	1	1	1	0.0888567	1	0.395356	0.607525	1	1	1
Granulicatella	1	0.00298502	0.000280216	0.00810145	0.00302079	0.00242555	0.00309519	0.00577486	0.795205	1	1	0.126615	NA	1.53953e-07	1	1	0.0131002	0.0112561	0.0279026	0.110315	0.0918153	0.00195303	0.0357389	1	0.26225	1	0.249515	1	0.160805	1	1
Gemella	1	0.105276	0.0140356	0.0942807	2.12896e-12	0.0225977	1	0.00173087	0.952055	1	1	0.126615	3.9344e-07	NA	1	1	0.285084	6.25061e-05	1	0.00249199	0.06411	0.00550612	0.515981	1	1.49914e-05	1	0.722115	1	4.6186e-07	1	1
Capnocytophaga	1	0.756554	0.0170432	3.20191e-05	1	0.00126245	0.00487536	0.0095757	0.473372	1	1	3.09856e-06	0.943066	1	NA	1	0.356309	1	0.870154	0.319097	0.0835537	1	1	1	0.644228	1	1	1	0.263003	1	1
Devosia	1	1	0.946049	1	1	1	1	1	1	0.67701	0.0478961	1	0.943066	1	1	NA	1	1	1	1	1	1	1	1	1	5.93128e-07	0.249515	0.858232	1	1	0.351681
Actinomyces	1	1	8.45273e-06	3.75061e-07	1	4.04615e-08	1.35989e-07	0.867938	1	1	1	0.830954	0.00877657	0.247073	0.453485	1	NA	0.193284	5.05904e-07	0.129094	0.349231	6.0791e-05	0.00099099	1	1	1	0.390301	0.858232	0.0655455	1	1
Neisseria	1	1	0.849563	0.324844	1.93202e-06	1	1	0.175822	1	1	1	0.886409	0.00625338	2.50024e-05	1	1	0.140829	NA	1	0.50979	0.00892568	0.450209	0.0254785	1	0.124761	1	1	1	0.00018081	1	1
c_Bacilli_Unclassified_1	1	1	0.120468	0.00915906	1	0.0728156	3.84623e-06	1	1	1	1	0.134414	0.00837077	1	0.792896	1	1.68635e-07	1	NA	1	0.628444	1	0.547423	1	1	1	1	0.858232	1	1	0.795018
Oribacterium	1	1	0.102009	3.20994e-05	0.0204225	3.53717e-07	0.858838	0.00173087	1	1	1	0.886612	0.0689471	0.00178	0.414826	1	0.140829	0.600278	1	NA	0.042056	0.00195303	0.00638525	1	0.644228	1	1	1	0.00368635	1	1
Leptotrichia	1	0.22963	0.142704	0.0035123	0.00302079	0.108132	1	1.14094e-05	1	1	1	0.0833114	0.0702117	0.0427575	0.143235	1	0.395795	0.0111571	0.870154	0.0280373	NA	0.0517339	1.76785e-06	1	0.100744	1	1	1	0.0434413	1	1
Atopobium	1	1	0.00223303	1.3613e-07	0.0448054	2.26202e-13	0.0230715	0.0171744	0.911538	1	1	1	0.0034178	0.00619439	1	1	4.05273e-05	0.600278	1	0.00249199	0.06411	NA	6.63731e-06	1	0.467927	1	1	1	0.00370248	1	1
Megasphaera	1	1	0.402633	8.07209e-07	0.00403749	3.32737e-06	1	0.0171744	1	1	1	1	0.0274915	0.386986	1	1	0.00070785	0.0364876	0.806136	0.00638525	3.5357e-06	8.84975e-06	NA	1	0.952486	1	1	1	0.0367882	1	1
Planomicrobium	1	0.5845	1	0.805818	1	1	1	0.867938	1	1	1	0.886409	1	0.84828	1	1	1	1	1	1	1	1	1	NA	1	1	0.936529	0.858232	1	1.06448e-13	1
Parvimonas	1	0.63335	0.141431	0.0403391	1.07186e-05	0.295533	1	0.00010004	1	1	1	0.0740472	0.138026	3.74785e-06	0.792896	1	1	0.142584	1	0.618279	0.06411	0.378899	1	1	NA	1	0.828231	1	0.00590519	1	1
Serratia	1	1	1	1	1	1	1	1	1	0.0180104	0.0154548	1	0.327991	0.437884	1	5.93128e-07	1	1	0.870154	1	1	1	1	1	1	NA	1	1	1	1	1
Aquabacterium	1	0.448617	0.922832	1	0.374459	1	1	1	1	0.319995	1	0.225918	0.068018	0.437884	1	0.150114	0.227676	1	1	1	1	1	1	1	0.644228	1	NA	0.438183	1	0.394525	0.136047
Lactobacillus	1	0.5845	1	1	1	1	1	0.867938	1	0.313489	1	0.202508	1	1	1	1	0.520603	1	0.858232	1	1	1	1	1	1	1	0.26291	NA	1	1	0.0114813
Moryella	1	1	0.027273	0.000140338	0.00078567	0.000396306	1	0.0171744	1	1	1	0.886409	0.12507	1.53953e-07	0.414826	1	0.0946768	0.00012054	1	0.00368635	0.06411	0.00323967	0.0367882	1	0.0118104	1	1	1	NA	1	1
Lysinibacillus	1	1	0.710422	0.802611	1	0.654082	1	1	1	0.67701	1	1	0.943066	1	1	1	1	1	1	1	1	1	1	1.06448e-13	1	1	0.249515	0.858232	1	NA	0.169082
c_Actinobacteria_Unclassified_1	1	1	0.0223328	1	0.590873	1	0.039609	1	0.0870312	0.203017	1	1	1	1	1	0.703362	1	1	0.806136	1	1	1	1	1	1	1	0.249515	0.0114813	1	0.394525	NA

## Sheet: Supplementary_Table_2f (CFMW)
Correlation Weight (r)	Streptococcus	Veillonella	Prevotella	Rothia	c_Betaproteobacteria_Unclassified	Sphingomonas	Granulicatella	Actinomyces	Neisseria	Derxia	c_Bacilli_Unclassified	Lactobacillus	Pseudomonas	Leptotrichia	Capnocytophaga	Fusobacterium	Porphyromonas	k_Bacteria_Unclassified	Haemophilus	Gemella	Blautia	Oribacterium	Corynebacterium	Campylobacter	Blastococcus	Curtobacterium	Megasphaera	Devosia	Dietzia	Mycoplasma	Burkholderia	c_Clostridia_Unclassified	Bradyrhizobium	Atopobium	c_Betaproteobacteria_Unclassified.1	P5d1.392	c_Alphaproteobacteria_Unclassified
Streptococcus	1	-0.619872	-0.441083	-0.0805535	0.238743	0.465348	-0.256999	-0.295179	-0.390689	-0.0520341	-0.454369	0.171732	-0.451457	-0.148754	-0.571386	-0.243416	-0.488151	-0.297659	-0.192869	-0.191122	-0.136475	-0.12843	-0.00303183	-0.496587	-0.249839	0.294554	-0.178081	-0.289271	-0.107097	-0.224021	0.228266	0.136814	0.237988	-0.312689	-0.292067	-0.229342	-0.0315391
Veillonella	-0.619872	1	0.577973	-0.174042	-0.261443	-0.478586	0.190223	0.281227	0.095474	-0.213719	0.417869	0.154475	0.266008	0.0878923	0.669526	-0.0225206	0.182099	0.520654	-0.160416	0.149044	0.19156	0.178495	0.159756	0.569047	0.220401	-0.149594	0.339307	0.257257	-0.0060651	0.251668	0.0247504	0.370191	-0.281112	0.0938006	0.0998968	0.155702	0.155634
Prevotella	-0.441083	0.577973	1	0.486558	-0.453336	-0.428695	0.637554	0.703763	0.381654	0.0676844	0.631231	0.034701	-0.246681	0.428653	0.55701	0.4742	0.794646	0.698068	0.199247	0.427849	0.515131	0.456665	0.531651	0.485581	-0.136201	-0.286576	0.798873	0.0972683	-0.117208	-0.0962045	-0.0856407	0.249602	-0.623186	0.665727	0.736295	0.363	-0.351857
Rothia	-0.0805535	-0.174042	0.486558	1	-0.268903	-0.29639	0.689326	0.289318	0.175741	0.0760159	0.491693	0.0410764	-0.301607	0.250698	-0.0608963	0.504494	0.555854	0.291403	0.383509	0.219713	0.533035	0.0421423	0.352032	-0.0635327	-0.17957	-0.273689	0.377991	-0.17682	-0.355731	-0.161015	-0.0537064	-0.0300149	-0.510176	0.548781	0.389074	0.456339	-0.622383
c_Betaproteobacteria_Unclassified	0.238743	-0.261443	-0.453336	-0.268903	1	0.220918	-0.303955	-0.118958	0.018235	0.326668	-0.330836	0.104493	0.0609928	-0.0803481	-0.151471	-0.109471	-0.341888	-0.136697	0.120306	-0.165315	-0.263894	-0.0200579	-0.243146	-0.151874	0.0516366	0.210983	-0.358371	-0.261028	-0.242058	0.200777	0.0348161	-0.282423	0.596008	-0.121229	-0.20489	-0.0532156	0.31366
Sphingomonas	0.465348	-0.478586	-0.428695	-0.29639	0.220918	1	-0.41783	-0.328382	-0.259296	-0.272641	-0.473725	-0.0598355	-0.0789415	-0.14306	-0.516671	-0.266823	-0.216914	-0.443487	-0.370136	-0.500432	-0.557399	-0.370262	-0.291856	-0.376265	0.283886	0.364494	-0.375429	-0.111296	0.254696	-0.305858	0.0245304	-0.266639	0.483563	-0.367086	-0.340198	-0.434891	0.313567
Granulicatella	-0.256999	0.190223	0.637554	0.689326	-0.303955	-0.41783	1	0.463441	0.21488	-0.115139	0.803371	0.12228	-0.245291	0.455273	0.310988	0.599312	0.573722	0.386287	0.438308	0.437114	0.477153	0.427305	0.341696	0.272257	-0.310899	-0.138938	0.48326	-0.129854	-0.288797	-0.120569	0.0627497	0.0511135	-0.410068	0.627418	0.6388	0.794201	-0.28265
Actinomyces	-0.295179	0.281227	0.703763	0.289318	-0.118958	-0.328382	0.463441	1	0.232003	0.00719426	0.414249	0.302889	0.0435496	0.401652	0.487911	0.442142	0.638945	0.507611	0.165688	0.426806	0.283659	0.632738	0.265735	0.53688	-0.00224573	-0.04863	0.437146	0.289486	0.0293219	0.237959	-0.0379788	0.0603141	-0.181771	0.744038	0.57682	0.362574	-0.104317
Neisseria	-0.390689	0.095474	0.381654	0.175741	0.018235	-0.259296	0.21488	0.232003	1	0.516116	0.0101442	-0.247525	0.154067	0.306122	0.270159	0.272987	0.447197	0.224305	0.494354	0.297156	0.295059	0.414964	0.141802	0.483381	-0.209065	0.12231	0.150851	-0.164326	-0.237615	-0.251247	-0.288087	0.315214	-0.268304	0.357639	0.565991	0.240712	0.0112357
Derxia	-0.0520341	-0.213719	0.0676844	0.0760159	0.326668	-0.272641	-0.115139	0.00719426	0.516116	1	-0.0357438	-0.115293	0.0287903	0.182799	0.0373424	0.23213	0.0290324	0.075411	0.505555	0.285164	0.0429505	0.130459	0.273089	0.148759	-0.238411	0.0476553	-0.0290324	-0.111349	-0.161011	0.187149	-0.206075	-0.00317158	-0.120222	0.091452	0.138734	0.0794525	-0.0403719
c_Bacilli_Unclassified	-0.454369	0.417869	0.631231	0.491693	-0.330836	-0.473725	0.803371	0.414249	0.0101442	-0.0357438	1	0.10468	-0.111058	0.364909	0.519548	0.492973	0.47826	0.451821	0.326031	0.413466	0.207785	0.271883	0.391647	0.186829	-0.0292889	-0.180137	0.474316	-0.0161345	-0.157227	0.205312	-0.0141117	-0.134294	-0.454976	0.454597	0.497202	0.724202	-0.200184
Lactobacillus	0.171732	0.154475	0.034701	0.0410764	0.104493	-0.0598355	0.12228	0.302889	-0.247525	-0.115293	0.10468	1	0.267909	0.0518076	0.116893	0.0717639	-0.0576691	0.349452	0.0526755	0.381811	0.0310288	0.287305	0.252273	0.0946295	0.0601556	0.133962	0.0698249	0.20817	0.193042	0.387259	0.441827	0.00356859	0.046683	0.104313	-0.0429395	0.1842	-0.114253
Pseudomonas	-0.451457	0.266008	-0.246681	-0.301607	0.0609928	-0.0789415	-0.245291	0.0435496	0.154067	0.0287903	-0.111058	0.267909	1	-0.256778	0.130727	-0.235296	-0.197032	-0.138653	-0.107617	0.0925377	-0.355377	0.047883	-0.19583	0.258025	0.405512	0.0594754	-0.43722	0.401815	0.391559	0.424092	0.00191693	-0.338435	0.316944	-0.19852	-0.19904	-0.00868825	0.393983
Leptotrichia	-0.148754	0.0878923	0.428653	0.250698	-0.0803481	-0.14306	0.455273	0.401652	0.306122	0.182799	0.364909	0.0518076	-0.256778	1	0.549389	0.882003	0.531698	0.342496	0.578177	0.58301	0.176922	0.683353	0.431435	0.262117	0.141501	-0.0288788	0.318066	0.255619	0.0792051	0.160347	-0.0137336	0.271586	-0.155741	0.525449	0.498351	0.199146	0.153352
Capnocytophaga	-0.571386	0.669526	0.55701	-0.0608963	-0.151471	-0.516671	0.310988	0.487911	0.270159	0.0373424	0.519548	0.116893	0.130727	0.549389	1	0.413464	0.475854	0.517435	0.283404	0.52094	0.125978	0.641252	0.252125	0.436089	0.265189	-0.185754	0.450461	0.3571	0.0785773	0.289947	0.112722	0.248119	-0.248317	0.406023	0.563568	0.252876	0.204091
Fusobacterium	-0.243416	-0.0225206	0.4742	0.504494	-0.109471	-0.266823	0.599312	0.442142	0.272987	0.23213	0.492973	0.0717639	-0.235296	0.882003	0.413464	1	0.656215	0.26603	0.688135	0.533148	0.349047	0.530747	0.353083	0.230257	-0.00475525	-0.133072	0.20394	0.153244	-0.0256916	0.234641	-0.0688026	0.025327	-0.256596	0.701165	0.54281	0.364486	-0.123187
Porphyromonas	-0.488151	0.182099	0.794646	0.555854	-0.341888	-0.216914	0.573722	0.638945	0.447197	0.0290324	0.47826	-0.0576691	-0.197032	0.531698	0.475854	0.656215	1	0.367067	0.405227	0.277824	0.463976	0.385344	0.148115	0.342516	-0.0309263	-0.215569	0.480566	0.0170365	-0.128529	-0.131296	-0.133509	0.108373	-0.476799	0.807052	0.78311	0.269754	-0.305446
k_Bacteria_Unclassified	-0.297659	0.520654	0.698068	0.291403	-0.136697	-0.443487	0.386287	0.507611	0.224305	0.075411	0.451821	0.349452	-0.138653	0.342496	0.517435	0.26603	0.367067	1	0.133329	0.513698	0.345482	0.384047	0.752007	0.360355	-0.0107299	-0.0919182	0.737623	0.214056	-0.00931679	0.159032	-0.118092	0.354876	-0.544615	0.319306	0.282564	0.281139	-0.225382
Haemophilus	-0.192869	-0.160416	0.199247	0.383509	0.120306	-0.370136	0.438308	0.165688	0.494354	0.505555	0.326031	0.0526755	-0.107617	0.578177	0.283404	0.688135	0.405227	0.133329	1	0.643997	0.190446	0.500854	0.135464	-0.0382676	-0.323666	0.116032	0.0757491	-0.151167	-0.218587	0.105362	-0.0747013	0.0328909	-0.299551	0.437867	0.535524	0.508503	-0.212446
Gemella	-0.191122	0.149044	0.427849	0.219713	-0.165315	-0.500432	0.437114	0.426806	0.297156	0.285164	0.413466	0.381811	0.0925377	0.58301	0.52094	0.533148	0.277824	0.513698	0.643997	1	0.0529809	0.782483	0.583458	0.159667	-0.114158	0.0665542	0.422981	0.374699	0.141343	0.333744	0.0384329	0.239325	-0.335556	0.29975	0.469396	0.400178	-0.0371079
Blautia	-0.136475	0.19156	0.515131	0.533035	-0.263894	-0.557399	0.477153	0.283659	0.295059	0.0429505	0.207785	0.0310288	-0.355377	0.176922	0.125978	0.349047	0.463976	0.345482	0.190446	0.0529809	1	0.175517	0.205789	0.377638	-0.47266	-0.332831	0.432444	-0.276429	-0.399715	-0.18943	0.0369769	0.4508	-0.462772	0.613689	0.417616	0.194758	-0.556022
Oribacterium	-0.12843	0.178495	0.456665	0.0421423	-0.0200579	-0.370262	0.427305	0.632738	0.414964	0.130459	0.271883	0.287305	0.047883	0.683353	0.641252	0.530747	0.385344	0.384047	0.500854	0.782483	0.175517	1	0.341153	0.388981	-0.091502	0.138934	0.401977	0.264633	0.0950704	0.177671	0.12234	0.355941	-0.0369943	0.525497	0.674187	0.325951	0.209061
Corynebacterium	-0.00303183	0.159756	0.531651	0.352032	-0.243146	-0.291856	0.341696	0.265735	0.141802	0.273089	0.391647	0.252273	-0.19583	0.431435	0.252125	0.353083	0.148115	0.752007	0.135464	0.583458	0.205789	0.341153	1	0.2075	-0.00803283	0.0305839	0.596744	0.295849	0.166365	0.208495	-0.0615267	0.307939	-0.402092	0.195522	0.13461	0.175638	-0.0948553
Campylobacter	-0.496587	0.569047	0.485581	-0.0635327	-0.151874	-0.376265	0.272257	0.53688	0.483381	0.148759	0.186829	0.0946295	0.258025	0.262117	0.436089	0.230257	0.342516	0.360355	-0.0382676	0.159667	0.377638	0.388981	0.2075	1	-0.0274188	-0.0603667	0.218142	0.307341	0.0901709	0.0499831	-0.0194139	0.293692	-0.0515177	0.44157	0.294711	0.230324	0.14
Blastococcus	-0.249839	0.220401	-0.136201	-0.17957	0.0516366	0.283886	-0.310899	-0.00224573	-0.209065	-0.238411	-0.0292889	0.0601556	0.405512	0.141501	0.265189	-0.00475525	-0.0309263	-0.0107299	-0.323666	-0.114158	-0.47266	-0.091502	-0.00803283	-0.0274188	1	-0.208263	-0.170094	0.486617	0.299815	0.375991	0.0983155	-0.233317	0.318251	-0.1808	-0.281724	-0.380291	0.387261
Curtobacterium	0.294554	-0.149594	-0.286576	-0.273689	0.210983	0.364494	-0.138938	-0.04863	0.12231	0.0476553	-0.180137	0.133962	0.0594754	-0.0288788	-0.185754	-0.133072	-0.215569	-0.0919182	0.116032	0.0665542	-0.332831	0.138934	0.0305839	-0.0603667	-0.208263	1	-0.239345	-0.0972683	0.296588	-0.0464881	-0.12761	0.0969678	0.28079	-0.0507221	-0.0694821	0.135505	0.351048
Megasphaera	-0.178081	0.339307	0.798873	0.377991	-0.358371	-0.375429	0.48326	0.437146	0.150851	-0.0290324	0.474316	0.0698249	-0.43722	0.318066	0.450461	0.20394	0.480566	0.737623	0.0757491	0.422981	0.432444	0.401977	0.596744	0.218142	-0.170094	-0.239345	1	0.0511095	-0.102823	-0.241218	0.00655626	0.473662	-0.535705	0.350639	0.516791	0.171635	-0.324713
Devosia	-0.289271	0.257257	0.0972683	-0.17682	-0.261028	-0.111296	-0.129854	0.289486	-0.164326	-0.111349	-0.0161345	0.20817	0.401815	0.255619	0.3571	0.153244	0.0170365	0.214056	-0.151167	0.374699	-0.276429	0.264633	0.295849	0.307341	0.486617	-0.0972683	0.0511095	1	0.722999	0.395565	0.146301	-0.0330865	0.136406	0.0170365	-0.191043	-0.177614	0.312977
Dietzia	-0.107097	-0.0060651	-0.117208	-0.355731	-0.242058	0.254696	-0.288797	0.0293219	-0.237615	-0.161011	-0.157227	0.193042	0.391559	0.0792051	0.0785773	-0.0256916	-0.128529	-0.00931679	-0.218587	0.141343	-0.399715	0.0950704	0.166365	0.0901709	0.299815	0.296588	-0.102823	0.722999	1	0.21204	-0.00344921	-0.196572	0.303367	-0.128529	-0.276248	-0.256829	0.404466
Mycoplasma	-0.224021	0.251668	-0.0962045	-0.161015	0.200777	-0.305858	-0.120569	0.237959	-0.251247	0.187149	0.205312	0.387259	0.424092	0.160347	0.289947	0.234641	-0.131296	0.159032	0.105362	0.333744	-0.18943	0.177671	0.208495	0.0499831	0.375991	-0.0464881	-0.241218	0.395565	0.21204	1	0.00691943	-0.268166	0.166039	0.0753169	-0.222732	-0.0240516	0.246189
Burkholderia	0.228266	0.0247504	-0.0856407	-0.0537064	0.0348161	0.0245304	0.0627497	-0.0379788	-0.288087	-0.206075	-0.0141117	0.441827	0.00191693	-0.0137336	0.112722	-0.0688026	-0.133509	-0.118092	-0.0747013	0.0384329	0.0369769	0.12234	-0.0615267	-0.0194139	0.0983155	-0.12761	0.00655626	0.146301	-0.00344921	0.00691943	1	0.0370411	0.280365	0.0804632	-0.00972168	0.0236125	0.0209866
c_Clostridia_Unclassified	0.136814	0.370191	0.249602	-0.0300149	-0.282423	-0.266639	0.0511135	0.0603141	0.315214	-0.00317158	-0.134294	0.00356859	-0.338435	0.271586	0.248119	0.025327	0.108373	0.354876	0.0328909	0.239325	0.4508	0.355941	0.307939	0.293692	-0.233317	0.0969678	0.473662	-0.0330865	-0.196572	-0.268166	0.0370411	1	-0.361006	0.0752143	0.205018	-0.172287	-0.0500757
Bradyrhizobium	0.237988	-0.281112	-0.623186	-0.510176	0.596008	0.483563	-0.410068	-0.181771	-0.268304	-0.120222	-0.454976	0.046683	0.316944	-0.155741	-0.248317	-0.256596	-0.476799	-0.544615	-0.299551	-0.335556	-0.462772	-0.0369943	-0.402092	-0.0515177	0.318251	0.28079	-0.535705	0.136406	0.303367	0.166039	0.280365	-0.361006	1	-0.196444	-0.384942	-0.303871	0.652237
Atopobium	-0.312689	0.0938006	0.665727	0.548781	-0.121229	-0.367086	0.627418	0.744038	0.357639	0.091452	0.454597	0.104313	-0.19852	0.525449	0.406023	0.701165	0.807052	0.319306	0.437867	0.29975	0.613689	0.525497	0.195522	0.44157	-0.1808	-0.0507221	0.350639	0.0170365	-0.128529	0.0753169	0.0804632	0.0752143	-0.196444	1	0.709526	0.417656	-0.251327
c_Betaproteobacteria_Unclassified.1	-0.292067	0.0998968	0.736295	0.389074	-0.20489	-0.340198	0.6388	0.57682	0.565991	0.138734	0.497202	-0.0429395	-0.19904	0.498351	0.563568	0.54281	0.78311	0.282564	0.535524	0.469396	0.417616	0.674187	0.13461	0.294711	-0.281724	-0.0694821	0.516791	-0.191043	-0.276248	-0.222732	-0.00972168	0.205018	-0.384942	0.709526	1	0.467669	-0.193819
P5d1.392	-0.229342	0.155702	0.363	0.456339	-0.0532156	-0.434891	0.794201	0.362574	0.240712	0.0794525	0.724202	0.1842	-0.00868825	0.199146	0.252876	0.364486	0.269754	0.281139	0.508503	0.400178	0.194758	0.325951	0.175638	0.230324	-0.380291	0.135505	0.171635	-0.177614	-0.256829	-0.0240516	0.0236125	-0.172287	-0.303871	0.417656	0.467669	1	-0.230708
c_Alphaproteobacteria_Unclassified	-0.0315391	0.155634	-0.351857	-0.622383	0.31366	0.313567	-0.28265	-0.104317	0.0112357	-0.0403719	-0.200184	-0.114253	0.393983	0.153352	0.204091	-0.123187	-0.305446	-0.225382	-0.212446	-0.0371079	-0.556022	0.209061	-0.0948553	0.14	0.387261	0.351048	-0.324713	0.312977	0.404466	0.246189	0.0209866	-0.0500757	0.652237	-0.251327	-0.193819	-0.230708	1
Benjamini-Hochberg-Yekutieli P-adjust	Streptococcus	Veillonella	Prevotella	Rothia	c_Betaproteobacteria_Unclassified	Sphingomonas	Granulicatella	Actinomyces	Neisseria	Derxia	c_Bacilli_Unclassified	Lactobacillus	Pseudomonas	Leptotrichia	Capnocytophaga	Fusobacterium	Porphyromonas	k_Bacteria_Unclassified	Haemophilus	Gemella	Blautia	Oribacterium	Corynebacterium	Campylobacter	Blastococcus	Curtobacterium	Megasphaera	Devosia	Dietzia	Mycoplasma	Burkholderia	c_Clostridia_Unclassified	Bradyrhizobium	Atopobium	c_Betaproteobacteria_Unclassified.1	P5d1.392	c_Alphaproteobacteria_Unclassified
Streptococcus	NA	0.0048066	0.00492426	1	1	0.656697	1	1	1	1	0.656697	1	0.656697	1	0.330549	1	0.656697	1	1	1	1	1	1	0.656697	1	1	1	1	1	1	1	1	1	1	1	1	1
Veillonella	0.0048066	NA	1	1	1	0.627521	1	1	1	1	1	1	1	1	0.0714606	1	1	0.408038	1	1	1	1	1	0.230462	1	1	1	1	1	1	1	1	1	1	1	1	1
Prevotella	0.29334	0.00492426	NA	0.202122	0.26359	0.298361	0.0228917	0.00638499	0.492426	1	0.0232545	1	1	0.298361	0.0866289	0.222941	0.000445646	0.00638499	1	0.298361	0.148881	0.26359	0.123389	0.202122	1	1	0.000445646	1	1	1	1	1	0.0248788	0.0131742	0.00310028	0.555259	0.599121
Rothia	1	1	0.309858	NA	1	1	0.0412467	1	1	1	0.309858	1	1	1	1	0.302538	0.251489	1	0.871045	1	0.265113	1	0.996722	1	1	1	0.871045	1	0.996722	1	1	1	0.302538	0.251489	0.871045	0.430069	0.114012
c_Betaproteobacteria_Unclassified	1	1	1	1	NA	1	1	1	1	1	1	1	1	1	1	1	1	1	1	1	1	1	1	1	1	1	1	1	1	1	1	1	0.40414	1	1	1	1
Sphingomonas	0.54202	0.54202	0.619858	1	1	NA	0.645744	0.997096	1	1	0.54202	1	1	1	0.54202	1	1	0.619858	0.771505	0.54202	0.54202	0.771505	1	0.771505	1	0.771505	0.771505	1	1	1	1	1	0.54202	0.771505	0.936837	0.619858	1
Granulicatella	1	1	0.0320484	0.0137489	1	0.443949	NA	0.354287	1	1	0.000454925	1	1	0.363669	1	0.0538846	0.0789941	0.573222	0.397275	0.397275	0.320392	0.420595	0.874303	1	1	1	0.320392	1	1	1	1	1	0.459413	0.0338731	0.0320484	0.000454925	1
Actinomyces	1	1	0.013444	1	1	1	0.433018	NA	1	1	0.570986	1	1	0.616911	0.341594	0.505414	0.0448969	0.287986	1	0.52908	1	0.0448969	1	0.206779	1	1	0.505414	1	1	1	1	1	1	0.00706295	0.118998	0.892452	1
Neisseria	1	1	1	1	1	1	1	1	NA	0.730944	1	1	1	1	1	1	0.973676	1	0.730944	1	1	1	1	0.730944	1	1	1	1	1	1	1	1	1	1	0.730944	1	1
Derxia	1	1	1	1	1	1	1	1	1	NA	1	1	1	1	1	1	1	1	1	1	1	1	1	1	1	1	1	1	1	1	1	1	1	1	1	1	1
c_Bacilli_Unclassified	0.326732	0.440834	0.062012	0.326732	0.922861	0.326732	0.000588822	0.440834	1	1	NA	1	1	0.687235	0.326732	0.326732	0.326732	0.326732	0.922861	0.440834	1	1	0.539189	1	1	1	0.326732	1	1	1	1	1	0.326732	0.326732	0.326732	0.00701889	1
Lactobacillus	1	1	1	1	1	1	1	1	1	1	1	NA	1	1	1	1	1	1	1	1	1	1	1	1	1	1	1	1	1	1	1	1	1	1	1	1	1
Pseudomonas	1	1	1	1	1	1	1	1	1	1	1	1	NA	1	1	1	1	1	1	1	1	1	1	1	1	1	1	1	1	1	1	1	1	1	1	1	1
Leptotrichia	1	1	0.563808	1	1	1	0.484891	0.719729	1	1	1	1	1	NA	0.199008	3.98109e-06	0.215306	1	0.144845	0.144845	1	0.0244485	0.563808	1	1	1	1	1	1	1	1	1	1	0.215306	0.291353	1	1
Capnocytophaga	0.16584	0.0714606	0.16584	1	1	0.174235	1	0.248432	1	1	0.174235	1	1	0.16584	NA	0.499621	0.272083	0.174235	1	0.174235	1	0.0733133	1	0.402607	1	1	0.358405	0.834293	1	1	1	1	1	0.512459	0.16584	1	1
Fusobacterium	1	1	0.304011	0.235307	1	1	0.0754384	0.433912	1	1	0.253138	1	1	3.98109e-06	0.576485	NA	0.0252866	1	0.0142281	0.172291	0.963582	0.172291	0.963582	1	1	1	1	1	1	1	1	1	1	0.0142281	0.172291	0.936902	1
Porphyromonas	0.251154	1	0.000445646	0.126411	0.828986	1	0.105326	0.0309994	0.324559	1	0.251154	1	1	0.169524	0.251154	0.0252866	NA	0.708808	0.517356	1	0.276285	0.613458	1	0.828986	1	1	0.251154	1	1	1	1	1	0.251154	0.000445646	0.00049919	1	1
k_Bacteria_Unclassified	1	0.251988	0.0106417	1	1	0.511509	0.881883	0.251988	1	1	0.50825	0.915475	1	0.915475	0.251988	1	0.915475	NA	1	0.251988	0.915475	0.881883	0.00443898	0.915475	1	1	0.00443898	1	1	1	1	0.915475	0.251988	1	1	1	1
Haemophilus	1	1	1	0.887239	1	0.949417	0.550751	1	0.309822	0.309822	1	1	1	0.193127	1	0.0426843	0.752518	1	NA	0.0685851	1	0.309822	1	1	1	1	1	1	1	1	1	1	1	0.550751	0.309822	0.309822	1
Gemella	1	1	0.512484	1	1	0.282095	0.512484	0.512484	1	1	0.535299	0.678236	1	0.131636	0.261219	0.261219	1	0.261219	0.0685851	NA	1	0.00153905	0.131636	1	1	1	0.512484	0.690735	1	0.946225	1	1	0.946225	1	0.398071	0.585879	1
Blautia	1	1	0.357313	0.331391	1	0.294049	0.437088	1	1	1	1	1	0.940496	1	1	0.940496	0.437088	0.940496	1	1	NA	1	1	0.811994	0.437088	1	0.537119	1	0.679707	1	1	0.463794	0.437088	0.27689	0.593497	1	0.294049
Oribacterium	1	1	0.475714	1	1	0.770343	0.630892	0.0359175	0.668921	1	1	1	1	0.0210059	0.0359175	0.215135	0.705506	0.705506	0.280248	0.00153905	1	NA	0.927917	0.705506	1	1	0.705506	1	1	1	1	0.844465	1	0.215135	0.0210059	1	1
Corynebacterium	1	1	0.33932	1	1	1	1	1	1	1	1	1	1	1	1	1	1	0.0052668	1	0.173953	1	1	NA	1	1	1	0.173953	1	1	1	1	1	1	1	1	1	1
Campylobacter	0.584755	0.584755	0.584755	1	1	1	1	0.584755	0.584755	1	1	1	1	1	0.805213	1	1	1	1	1	1	1	1	NA	1	1	1	1	1	1	1	1	1	0.805213	1	1	1
Blastococcus	1	1	1	1	1	1	1	1	1	1	1	1	1	1	1	1	1	1	1	1	1	1	1	1	NA	1	1	1	1	1	1	1	1	1	1	1	1
Curtobacterium	1	1	1	1	1	1	1	1	1	1	1	1	1	1	1	1	1	1	1	1	1	1	1	1	1	NA	1	1	1	1	1	1	1	1	1	1	1
Megasphaera	1	0.850704	0.000730949	0.685217	0.777505	0.685217	0.374464	0.454485	1	1	0.374464	1	0.454485	0.950386	0.454485	1	0.374464	0.00443898	1	0.475878	0.454485	0.573573	0.132668	1	1	1	NA	1	1	1	1	0.374464	0.316535	0.798281	0.347791	1	0.934632
Devosia	1	1	1	1	1	1	1	1	1	1	1	1	1	1	1	1	1	1	1	1	1	1	1	1	1	1	1	NA	0.0146078	1	1	1	1	1	1	1	1
Dietzia	1	1	1	1	1	1	1	1	1	1	1	1	1	1	1	1	1	1	1	1	1	1	1	1	1	1	1	0.0146078	NA	1	1	1	1	1	1	1	1
Mycoplasma	1	1	1	1	1	1	1	1	1	1	1	1	1	1	1	1	1	1	1	1	1	1	1	1	1	1	1	1	1	NA	1	1	1	1	1	1	1
Burkholderia	1	1	1	1	1	1	1	1	1	1	1	1	1	1	1	1	1	1	1	1	1	1	1	1	1	1	1	1	1	1	NA	1	1	1	1	1	1
c_Clostridia_Unclassified	1	1	1	1	1	1	1	1	1	1	1	1	1	1	1	1	1	1	1	1	1	1	1	1	1	1	1	1	1	1	1	NA	1	1	1	1	1
Bradyrhizobium	1	1	0.111954	0.322519	0.134713	0.402557	0.710003	1	1	1	0.43818	1	1	1	1	1	0.402557	0.253228	1	1	0.437088	1	0.715989	1	1	1	0.253228	1	1	1	1	0.972237	NA	1	0.805865	1	0.111856
Atopobium	1	1	0.015809	0.125745	1	0.797252	0.0338731	0.00353148	0.829591	1	0.400416	1	1	0.150714	0.546623	0.00727308	0.000491331	1	0.423654	1	0.0395557	0.150714	1	0.423654	1	1	0.84263	1	1	1	1	1	1	NA	0.00727308	0.508462	1
c_Betaproteobacteria_Unclassified.1	1	1	0.00465042	0.582013	1	0.88753	0.0311075	0.0958658	0.0958658	1	0.182504	1	1	0.182504	0.0958658	0.124291	0.00149757	1	0.127008	0.244778	0.445123	0.0157544	1	1	1	1	0.158087	1	1	1	1	1	0.582013	0.00750291	NA	0.244778	1
P5d1.392	1	1	1	0.860137	1	0.954119	0.00090985	1	1	1	0.00701889	1	1	1	1	1	1	1	0.662502	1	1	1	1	1	1	1	1	1	1	1	1	1	1	1	0.860137	NA	1
c_Alphaproteobacteria_Unclassified	1	1	1	0.114012	1	1	1	1	1	1	1	1	1	1	1	1	1	1	1	1	0.294049	1	1	1	1	1	1	1	1	1	1	1	0.111856	1	1	1	NA

## Sheet: Supplementary_Table_2g (HP)
Correlation Weight (r)	Streptococcus	Prevotella	Veillonella	Neisseria	Gemella	Porphyromonas	Granulicatella	Rothia	Actinomyces	c_Betaproteobacteria_Unclassified_1	c_Betaproteobacteria_Unclassified_2	Haemophilus	Campylobacter	Leptotrichia	Oribacterium	k_Bacteria_Unclassified	Fusobacterium	p_Candidate_division_tm7_Unclassified	Atopobium	c_Clostridia_Unclassified_1	Capnocytophaga	c_Bacilli_Unclassified_1	Solobacterium	Derxia	Megasphaera	Selenomonas	Bergeyella	c_Clostridia_Incertae_sedis	Catonella	Mogibacterium	Bacteroides	Pelomonas	c_Uncultured_rumen_bacterium_Candidate_division_sr1	Kingella	c_Clostridia_Unclassified_2	c_Gammaproteobacteria_Unclassified_1	c_Tm7_phylum_sp._oral_clone_fr058_Candidate_division_tm7
Streptococcus	1	-0.626749	-0.563003	-0.400951	0.396428	-0.343847	-0.0925833	-0.331028	-0.332247	-0.407855	-0.31597	-0.064884	-0.501196	-0.418485	-0.52893	-0.464138	-0.326543	-0.401479	-0.343839	-0.402817	-0.327174	-0.227577	-0.489325	-0.267093	-0.363151	-0.458771	-0.271807	-0.472598	-0.450231	-0.553706	0.115165	0.119131	-0.334314	-0.0546385	-0.118764	0.0170173	-0.203847
Prevotella	-0.626749	1	0.788339	-0.0320316	-0.455397	0.0579801	0.0671317	0.0920139	0.366937	0.169153	-0.0053223	-0.173438	0.685529	0.205187	0.633536	0.290227	0.0760743	0.40702	0.609853	0.347122	0.0993419	0.178484	0.411591	0.0902838	0.620586	0.613467	-0.000259496	0.393484	0.509878	0.6529	-0.0952944	-0.0678116	0.108857	0.119386	0.426908	-0.0816227	0.256331
Veillonella	-0.563003	0.788339	1	-0.0805034	-0.570674	-0.0499549	0.012778	0.190042	0.432063	0.279107	-0.0497522	-0.190088	0.624892	0.193679	0.648734	0.440288	0.0191478	0.382461	0.693641	0.19999	0.174387	0.27981	0.370792	0.150244	0.530961	0.56329	-0.0475523	0.300231	0.494902	0.581168	-0.090712	-0.11451	-0.0665722	0.185356	0.37696	-0.124186	0.157731
Neisseria	-0.400951	-0.0320316	-0.0805034	1	-0.0611646	0.367724	0.260325	0.371756	0.00105531	0.347906	0.149648	0.191646	-0.0112826	0.112826	0.114773	0.198275	0.328641	-0.0191909	-0.18303	0.15159	0.359333	0.229569	0.0613201	0.474255	-0.256398	-0.0219866	0.407533	0.130481	-0.0217737	-0.000838278	0.0190904	-0.0831177	0.280834	-0.141237	-0.314988	0.258979	0.0369915
Gemella	0.396428	-0.455397	-0.570674	-0.0611646	1	0.0327727	0.134159	-0.245591	-0.294802	-0.284268	-0.0563371	0.116886	-0.286018	-0.280785	-0.369361	-0.383064	-0.0152593	-0.102405	-0.342139	-0.171763	-0.184518	-0.0221967	-0.284281	-0.233403	-0.329773	-0.554639	0.130828	-0.225236	-0.243054	-0.270785	-0.0687879	-0.0317261	0.0281765	0.0189698	-0.237401	0.213591	0.0883586
Porphyromonas	-0.343847	0.0579801	-0.0499549	0.367724	0.0327727	1	0.181021	-0.175609	-0.194135	-0.0106153	0.277812	0.230206	-0.0703134	0.151859	0.288042	-0.0886581	0.645696	0.158824	-0.271291	0.614616	0.293019	-0.0193786	0.197867	0.178873	-0.342923	-0.148076	0.337289	0.452062	0.104851	0.128474	0.155208	-0.0494339	0.550123	-0.0844297	-0.333155	0.141407	0.208029
Granulicatella	-0.0925833	0.0671317	0.012778	0.260325	0.134159	0.181021	1	0.0987213	-0.0672029	0.294415	0.0918589	0.165897	0.000510204	-0.0366402	-0.103652	0.0562452	-0.032885	0.11136	0.0720953	0.0141653	0.0555588	0.453837	-0.0392679	0.0676166	1.80397e-05	-0.0494795	0.183121	-0.00075785	-0.142055	0.0821313	0.10217	0.0344014	0.0533035	-0.0473936	-0.0563057	0.0726571	0.178487
Rothia	-0.331028	0.0920139	0.190042	0.371756	-0.245591	-0.175609	0.0987213	1	0.378167	0.739618	0.0654794	0.21711	0.158833	0.166838	-0.0536604	0.713109	-0.0933774	-0.0137506	0.165231	-0.145508	0.126346	0.451794	0.161268	0.307096	0.160121	0.17027	0.332299	0.0214985	0.0311221	0.120438	-0.064385	-0.0299633	-0.00255391	0.13472	-0.0266283	0.0340451	-0.112251
Actinomyces	-0.332247	0.366937	0.432063	0.00105531	-0.294802	-0.194135	-0.0672029	0.378167	1	0.135267	-0.10969	-0.0580611	0.382059	0.312629	0.254819	0.268166	0.0126982	0.262667	0.371474	0.0880544	0.110835	0.262025	0.312342	0.136416	0.442523	0.435711	-0.0657826	0.219268	0.436406	0.23614	-0.0465863	0.0372127	-0.0871963	0.229221	0.246422	-0.200356	0.0631944
c_Betaproteobacteria_Unclassified_1	-0.407855	0.169153	0.279107	0.347906	-0.284268	-0.0106153	0.294415	0.739618	0.135267	1	0.0544445	0.243423	0.178918	0.139679	0.0965257	0.849787	0.0895772	0.210152	0.214964	-0.078567	0.12717	0.50416	0.228737	0.2811	0.158655	0.189539	0.38072	0.0503619	0.0291879	0.184122	0.0631044	-0.0426853	0.0260661	0.0832267	-0.0431822	-0.00912632	0.00780759
c_Betaproteobacteria_Unclassified_2	-0.31597	-0.0053223	-0.0497522	0.149648	-0.0563371	0.277812	0.0918589	0.0654794	-0.10969	0.0544445	1	0.0630173	0.0420558	0.111571	-0.0680156	0.0607459	0.0843781	-0.0115874	-0.0778293	0.188343	0.205967	0.0159225	0.0697457	0.125398	-0.0709626	0.0652821	0.229768	0.0467162	0.00687063	0.176869	-0.117737	-0.0940672	0.370606	0.101813	-0.223421	0.00806691	0.0201678
Haemophilus	-0.064884	-0.173438	-0.190088	0.191646	0.116886	0.230206	0.165897	0.21711	-0.0580611	0.243423	0.0630173	1	-0.0780656	0.0992745	-0.102613	0.128213	0.266817	-0.00444461	-0.152208	0.267274	0.336224	0.141193	-0.143563	0.290558	-0.225493	-0.140219	0.452853	0.0868251	-0.0882691	-0.0997402	0.225109	-0.0623965	0.193043	0.227563	-0.15052	0.134543	0.187574
Campylobacter	-0.501196	0.685529	0.624892	-0.0112826	-0.286018	-0.0703134	0.000510204	0.158833	0.382059	0.178918	0.0420558	-0.0780656	1	0.330386	0.571993	0.279134	0.142175	0.426594	0.642682	0.218975	0.147054	0.0771955	0.368563	0.103468	0.640386	0.695888	0.0749667	0.32176	0.560202	0.591782	-0.0756437	-0.114839	0.105242	0.205737	0.452052	-0.130304	0.237388
Leptotrichia	-0.418485	0.205187	0.193679	0.112826	-0.280785	0.151859	-0.0366402	0.166838	0.312629	0.139679	0.111571	0.0992745	0.330386	1	0.167444	0.203129	0.253032	0.248843	0.0661931	0.159402	0.264557	0.12946	0.282578	0.126254	0.273289	0.295942	-0.0572121	0.198318	0.245205	0.147408	0.00368443	-0.0276358	0.114591	0.0250194	0.179499	-0.183153	0.0917324
Oribacterium	-0.52893	0.633536	0.648734	0.114773	-0.369361	0.288042	-0.103652	-0.0536604	0.254819	0.0965257	-0.0680156	-0.102613	0.571993	0.167444	1	0.174119	0.42658	0.385862	0.425395	0.368302	0.213291	0.037294	0.270215	0.236445	0.304141	0.400381	0.0779348	0.420101	0.562573	0.479418	0.111728	-0.134083	0.06823	0.00676585	0.282891	-0.0785152	0.101684
k_Bacteria_Unclassified	-0.464138	0.290227	0.440288	0.198275	-0.383064	-0.0886581	0.0562452	0.713109	0.268166	0.849787	0.0607459	0.128213	0.279134	0.203129	0.174119	1	0.0280743	0.199575	0.308362	-0.0804397	0.0750199	0.444079	0.263021	0.251757	0.248742	0.309479	0.211741	0.100773	0.173371	0.308268	-0.0180137	-0.0563217	-0.0101458	0.0852474	0.0807962	-0.10644	0.096833
Fusobacterium	-0.326543	0.0760743	0.0191478	0.328641	-0.0152593	0.645696	-0.032885	-0.0933774	0.0126982	0.0895772	0.0843781	0.266817	0.142175	0.253032	0.42658	0.0280743	1	0.239297	-0.166391	0.549618	0.350534	-0.0775692	0.242866	0.170582	-0.265658	-0.0275181	0.412529	0.471059	0.311107	0.21324	0.143432	-0.114567	0.37342	-0.10419	-0.295448	-0.0280613	0.24805
p_Candidate_division_tm7_Unclassified	-0.401479	0.40702	0.382461	-0.0191909	-0.102405	0.158824	0.11136	-0.0137506	0.262667	0.210152	-0.0115874	-0.00444461	0.426594	0.248843	0.385862	0.199575	0.239297	1	0.311841	0.281545	0.0781196	0.154768	0.468344	-0.162507	0.345509	0.324184	0.134093	0.3101	0.4998	0.448234	-0.0273479	-0.227552	0.269897	-0.0375115	0.183382	-0.220432	0.481127
Atopobium	-0.343839	0.609853	0.693641	-0.18303	-0.342139	-0.271291	0.0720953	0.165231	0.371474	0.214964	-0.0778293	-0.152208	0.642682	0.0661931	0.425395	0.308362	-0.166391	0.311841	1	0.01916	0.117442	0.21231	0.215849	0.0799978	0.615514	0.624541	-0.0927888	0.181193	0.397524	0.55191	-0.0569441	-0.228695	-0.130667	0.30968	0.387654	-0.19067	0.185256
c_Clostridia_Unclassified_1	-0.402817	0.347122	0.19999	0.15159	-0.171763	0.614616	0.0141653	-0.145508	0.0880544	-0.078567	0.188343	0.267274	0.218975	0.159402	0.368302	-0.0804397	0.549618	0.281545	0.01916	1	0.260123	-0.19137	0.465655	0.118932	-0.114594	0.167887	0.185053	0.625047	0.361143	0.448675	0.111796	-0.0641605	0.528652	0.121481	-0.0745337	-0.0300249	0.249907
Capnocytophaga	-0.327174	0.0993419	0.174387	0.359333	-0.184518	0.293019	0.0555588	0.126346	0.110835	0.12717	0.205967	0.336224	0.147054	0.264557	0.213291	0.0750199	0.350534	0.0781196	0.117442	0.260123	1	0.197026	-0.0418834	0.420566	-0.00104381	0.0934213	0.363696	0.1517	0.148164	0.150102	0.0899318	-0.266431	0.218465	0.157742	-0.0534208	0.0305533	0.153193
c_Bacilli_Unclassified_1	-0.227577	0.178484	0.27981	0.229569	-0.0221967	-0.0193786	0.453837	0.451794	0.262025	0.50416	0.0159225	0.141193	0.0771955	0.12946	0.037294	0.444079	-0.0775692	0.154768	0.21231	-0.19137	0.197026	1	0.0413162	0.0995003	0.18127	0.00360735	0.190499	-0.108013	-0.0513328	0.00552501	-0.0986648	-0.109417	-0.13483	0.0555476	-0.028551	-0.00498308	0.0348684
Solobacterium	-0.489325	0.411591	0.370792	0.0613201	-0.284281	0.197867	-0.0392679	0.161268	0.312342	0.228737	0.0697457	-0.143563	0.368563	0.282578	0.270215	0.263021	0.242866	0.468344	0.215849	0.465655	-0.0418834	0.0413162	1	-0.0644646	0.241703	0.292744	-0.0245737	0.553811	0.466066	0.543536	-0.122123	-0.123187	0.38296	-0.0131107	-0.0252591	-0.220722	0.12778
Derxia	-0.267093	0.0902838	0.150244	0.474255	-0.233403	0.178873	0.0676166	0.307096	0.136416	0.2811	0.125398	0.290558	0.103468	0.126254	0.236445	0.251757	0.170582	-0.162507	0.0799978	0.118932	0.420566	0.0995003	-0.0644646	1	-0.0513883	0.178336	0.21169	0.0928562	0.0857591	0.0891027	0.0289573	0.0662658	-0.00635669	0.147884	0.0321643	0.126666	-0.11225
Megasphaera	-0.363151	0.620586	0.530961	-0.256398	-0.329773	-0.342923	1.80397e-05	0.160121	0.442523	0.158655	-0.0709626	-0.225493	0.640386	0.273289	0.304141	0.248742	-0.265658	0.345509	0.615514	-0.114594	-0.00104381	0.18127	0.241703	-0.0513883	1	0.628408	-0.17751	0.0517136	0.330397	0.309581	-0.162829	0.0191633	-0.12279	0.155913	0.546811	-0.189512	0.177769
Selenomonas	-0.458771	0.613467	0.56329	-0.0219866	-0.554639	-0.148076	-0.0494795	0.17027	0.435711	0.189539	0.0652821	-0.140219	0.695888	0.295942	0.400381	0.309479	-0.0275181	0.324184	0.624541	0.167887	0.0934213	0.00360735	0.292744	0.178336	0.628408	1	-0.0752865	0.304366	0.462341	0.502011	-0.00820148	-0.0545401	0.0634938	0.244611	0.489662	-0.178632	0.195896
Bergeyella	-0.271807	-0.000259496	-0.0475523	0.407533	0.130828	0.337289	0.183121	0.332299	-0.0657826	0.38072	0.229768	0.452853	0.0749667	-0.0572121	0.0779348	0.211741	0.412529	0.134093	-0.0927888	0.185053	0.363696	0.190499	-0.0245737	0.21169	-0.17751	-0.0752865	1	0.118119	0.0393334	0.168541	0.0522741	-0.084102	0.27891	0.136935	-0.241487	0.252375	0.195766
c_Clostridia_Incertae_sedis	-0.472598	0.393484	0.300231	0.130481	-0.225236	0.452062	-0.00075785	0.0214985	0.219268	0.0503619	0.0467162	0.0868251	0.32176	0.198318	0.420101	0.100773	0.471059	0.3101	0.181193	0.625047	0.1517	-0.108013	0.553811	0.0928562	0.0517136	0.304366	0.118119	1	0.586966	0.541357	0.16091	-0.0450855	0.424283	0.0998941	-0.0419104	-0.026091	0.181212
Catonella	-0.450231	0.509878	0.494902	-0.0217737	-0.243054	0.104851	-0.142055	0.0311221	0.436406	0.0291879	0.00687063	-0.0882691	0.560202	0.245205	0.562573	0.173371	0.311107	0.4998	0.397524	0.361143	0.148164	-0.0513328	0.466066	0.0857591	0.330397	0.462341	0.0393334	0.586966	1	0.578164	0.00672232	-0.203503	0.147245	0.0867036	0.149644	-0.140662	0.257177
Mogibacterium	-0.553706	0.6529	0.581168	-0.000838278	-0.270785	0.128474	0.0821313	0.120438	0.23614	0.184122	0.176869	-0.0997402	0.591782	0.147408	0.479418	0.308268	0.21324	0.448234	0.55191	0.448675	0.150102	0.00552501	0.543536	0.0891027	0.309581	0.502011	0.168541	0.541357	0.578164	1	-0.113837	-0.214677	0.26302	0.104573	0.137315	-0.166969	0.271079
Bacteroides	0.115165	-0.0952944	-0.090712	0.0190904	-0.0687879	0.155208	0.10217	-0.064385	-0.0465863	0.0631044	-0.117737	0.225109	-0.0756437	0.00368443	0.111728	-0.0180137	0.143432	-0.0273479	-0.0569441	0.111796	0.0899318	-0.0986648	-0.122123	0.0289573	-0.162829	-0.00820148	0.0522741	0.16091	0.00672232	-0.113837	1	0.084101	-0.0732242	0.0582387	0.159789	-0.0253279	-0.137309
Pelomonas	0.119131	-0.0678116	-0.11451	-0.0831177	-0.0317261	-0.0494339	0.0344014	-0.0299633	0.0372127	-0.0426853	-0.0940672	-0.0623965	-0.114839	-0.0276358	-0.134083	-0.0563217	-0.114567	-0.227552	-0.228695	-0.0641605	-0.266431	-0.109417	-0.123187	0.0662658	0.0191633	-0.0545401	-0.084102	-0.0450855	-0.203503	-0.214677	0.084101	1	-0.216559	-0.0171128	0.149696	0.260739	-0.18721
c_Uncultured_rumen_bacterium_Candidate_division_sr1	-0.334314	0.108857	-0.0665722	0.280834	0.0281765	0.550123	0.0533035	-0.00255391	-0.0871963	0.0260661	0.370606	0.193043	0.105242	0.114591	0.06823	-0.0101458	0.37342	0.269897	-0.130667	0.528652	0.218465	-0.13483	0.38296	-0.00635669	-0.12279	0.0634938	0.27891	0.424283	0.147245	0.26302	-0.0732242	-0.216559	1	0.0895105	-0.272766	0.027316	0.327292
Kingella	-0.0546385	0.119386	0.185356	-0.141237	0.0189698	-0.0844297	-0.0473936	0.13472	0.229221	0.0832267	0.101813	0.227563	0.205737	0.0250194	0.00676585	0.0852474	-0.10419	-0.0375115	0.30968	0.121481	0.157742	0.0555476	-0.0131107	0.147884	0.155913	0.244611	0.136935	0.0998941	0.0867036	0.104573	0.0582387	-0.0171128	0.0895105	1	0.126653	-0.0413084	0.0308989
c_Clostridia_Unclassified_2	-0.118764	0.426908	0.37696	-0.314988	-0.237401	-0.333155	-0.0563057	-0.0266283	0.246422	-0.0431822	-0.223421	-0.15052	0.452052	0.179499	0.282891	0.0807962	-0.295448	0.183382	0.387654	-0.0745337	-0.0534208	-0.028551	-0.0252591	0.0321643	0.546811	0.489662	-0.241487	-0.0419104	0.149644	0.137315	0.159789	0.149696	-0.272766	0.126653	1	-0.177504	0.0509304
c_Gammaproteobacteria_Unclassified_1	0.0170173	-0.0816227	-0.124186	0.258979	0.213591	0.141407	0.0726571	0.0340451	-0.200356	-0.00912632	0.00806691	0.134543	-0.130304	-0.183153	-0.0785152	-0.10644	-0.0280613	-0.220432	-0.19067	-0.0300249	0.0305533	-0.00498308	-0.220722	0.126666	-0.189512	-0.178632	0.252375	-0.026091	-0.140662	-0.166969	-0.0253279	0.260739	0.027316	-0.0413084	-0.177504	1	-0.153262
c_Tm7_phylum_sp._oral_clone_fr058_Candidate_division_tm7	-0.203847	0.256331	0.157731	0.0369915	0.0883586	0.208029	0.178487	-0.112251	0.0631944	0.00780759	0.0201678	0.187574	0.237388	0.0917324	0.101684	0.096833	0.24805	0.481127	0.185256	0.249907	0.153193	0.0348684	0.12778	-0.11225	0.177769	0.195896	0.195766	0.181212	0.257177	0.271079	-0.137309	-0.18721	0.327292	0.0308989	0.0509304	-0.153262	1
Benjamini-Hochberg-Yekutieli P-adjust	Streptococcus	Prevotella	Veillonella	Neisseria	Gemella	Porphyromonas	Granulicatella	Rothia	Actinomyces	c_Betaproteobacteria_Unclassified_1	c_Betaproteobacteria_Unclassified_2	Haemophilus	Campylobacter	Leptotrichia	Oribacterium	k_Bacteria_Unclassified	Fusobacterium	p_Candidate_division_tm7_Unclassified	Atopobium	c_Clostridia_Unclassified_1	Capnocytophaga	c_Bacilli_Unclassified_1	Solobacterium	Derxia	Megasphaera	Selenomonas	Bergeyella	c_Clostridia_Incertae_sedis	Catonella	Mogibacterium	Bacteroides	Pelomonas	c_Uncultured_rumen_bacterium_Candidate_division_sr1	Kingella	c_Clostridia_Unclassified_2	c_Gammaproteobacteria_Unclassified_1	c_Tm7_phylum_sp._oral_clone_fr058_Candidate_division_tm7
Streptococcus	NA	1.50269e-08	1.02301e-06	0.0114263	0.010231	0.0396361	1	0.0581057	0.0434851	0.00650664	0.323205	1	3.65223e-05	0.0168316	1.37235e-05	0.000725193	0.052005	0.00479582	0.0237222	0.00454837	0.0764911	0.795313	0.000205638	0.416253	0.0174763	0.00028102	0.245956	0.000258999	0.000418603	2.79774e-06	1	1	0.0523559	1	1	1	0.95732
Prevotella	7.51346e-08	NA	0	1	0.00109788	1	1	1	0.0152952	1	1	1	1.72488e-10	0.817788	2.13846e-08	0.135482	1	0.00448605	5.76844e-08	0.0241536	1	1	0.00319523	1	4.12912e-08	5.44376e-08	1	0.00458656	4.0858e-05	7.92299e-09	1	1	1	1	0.00294802	1	0.569371
Veillonella	4.09206e-06	0	NA	1	4.90312e-06	1	1	1	0.00236001	0.182904	1	0.958676	1.74905e-08	0.853399	1.15041e-08	0.00131401	1	0.00773689	1.48462e-10	0.707279	1	0.359061	0.0115494	1	1.01405e-05	1.60617e-06	1	0.0731439	6.57561e-05	7.33884e-07	1	1	1	1	0.0142168	1	1
Neisseria	0.00228526	1	1	NA	1	0.0237985	0.986535	0.0206045	1	0.0392201	1	0.958676	1	1	1	0.616086	0.052005	1	0.674588	1	0.0532211	0.795313	1	0.00132707	0.19176	1	0.0087888	1	1	1	1	1	0.183861	1	0.0832151	1	1
Gemella	0.00255775	0.000329364	8.17187e-07	1	NA	1	1	0.469318	0.0994522	0.182904	1	1	0.094993	0.291559	0.00896692	0.0113472	1	1	0.0237222	0.959132	1	1	0.119109	0.621064	0.0352604	2.35014e-06	1	0.446475	0.249007	0.142042	1	1	1	1	0.364704	1	1
Porphyromonas	0.0141698	1	1	0.0237985	1	NA	1	1	0.576765	1	0.630894	0.671564	1	1	0.095895	1	1.50447e-08	0.958092	0.140205	9.94965e-08	0.179171	1	0.536347	1	0.0277453	1	0.0555284	0.000549517	1	1	1	1	1.88001e-05	1	0.0543215	1	0.95732
Granulicatella	1	1	1	0.250764	1	0.888974	NA	1	1	0.17234	1	1	1	1	1	1	1	1	1	1	1	0.00129821	1	1	1	1	0.868084	1	1	1	1	1	1	1	1	1	0.95732
Rothia	0.0184882	1	0.623838	0.0237985	0.280133	0.895743	1	NA	0.0136014	3.50383e-13	1	0.724859	1	1	1	8.7262e-12	1	1	0.826579	1	1	0.00129821	0.99957	0.280113	0.889634	0.855346	0.0558171	1	1	1	1	1	1	1	1	1	1
Actinomyces	0.0184882	0.00815745	0.000786669	1	0.132603	0.746402	1	0.020402	NA	1	1	1	0.00588993	0.238063	0.188211	0.202523	1	0.174505	0.010407	1	1	0.472859	0.0654806	1	0.000849181	0.000731585	1	0.476029	0.000709549	0.291913	1	1	1	1	0.345167	1	1
c_Betaproteobacteria_Unclassified_1	0.00216888	0.912785	0.101613	0.0336172	0.132791	1	0.603189	7.00765e-13	1	NA	1	0.671564	0.803653	1	1	0	1	0.438985	0.439039	1	1	0.000279846	0.326419	0.34695	0.889634	0.69281	0.0185697	1	1	0.730408	1	1	1	1	1	1	1
c_Betaproteobacteria_Unclassified_2	0.0258564	1	1	1	1	0.157723	1	1	1	1	NA	1	1	1	1	1	1	1	1	0.787406	0.772373	1	1	1	1	1	0.505172	1	1	0.796091	1	1	0.0178941	1	0.464432	1	1
Haemophilus	1	0.886789	0.623838	0.831932	1	0.42881	1	0.797345	1	0.403979	1	NA	1	1	1	1	0.199223	1	0.989161	0.207174	0.0689557	1	1	0.335631	0.33298	1	0.00370825	1	1	1	1	1	0.809924	1	1	1	0.95732
Campylobacter	6.57401e-05	1.72488e-10	2.18631e-08	1	0.132791	1	1	1	0.0136014	0.992748	1	1	NA	0.20752	1.49461e-06	0.166157	1	0.00239026	9.78862e-09	0.510945	1	1	0.0115494	1	2.38777e-08	1.16961e-10	1	0.0493096	2.4591e-06	5.58379e-07	1	1	1	1	0.00128281	1	0.638411
Leptotrichia	0.00153014	0.536859	0.623838	1	0.134566	1	1	1	0.0654806	1	1	1	0.0296457	NA	0.94031	0.616086	0.252692	0.230071	1	1	0.295867	1	0.119109	1	0.142022	0.0722463	1	0.687977	0.249007	1	1	1	1	1	0.961917	1	1
Oribacterium	1.71544e-05	1.06923e-08	3.83469e-09	1	0.0187091	0.130766	1	1	0.211737	1	1	1	6.40547e-07	1	NA	0.887832	0.0029897	0.00766365	0.00179703	0.0145712	0.719887	1	0.153747	0.621064	0.0653914	0.00292149	1	0.00174801	2.4591e-06	0.000102493	1	1	1	1	0.165362	1	1
k_Bacteria_Unclassified	0.000271948	0.079695	0.000597278	0.780376	0.0136167	1	1	8.7262e-12	0.186945	0	1	1	0.107513	0.817788	0.876102	NA	1	0.518619	0.05399	1	1	0.00138547	0.172966	0.521151	0.217814	0.0559838	0.637896	1	0.932224	0.0580052	1	1	1	1	1	1	1
Fusobacterium	0.0195019	1	1	0.0548013	1	1.50447e-08	1	1	1	1	1	0.503015	1	0.38748	0.0015724	1	NA	0.271609	0.826579	6.46993e-06	0.0538763	1	0.256944	1	0.161869	1	0.0087888	0.000258999	0.0498052	0.432385	1	1	0.0178941	1	0.13023	1	0.569371
p_Candidate_division_tm7_Unclassified	0.00228526	0.00207048	0.00535631	1	1	1	1	1	0.189144	0.658478	1	1	0.00108648	0.38748	0.00557357	0.616086	0.287586	NA	0.05399	0.15584	1	1	0.000337039	1	0.0277453	0.038731	1	0.0641329	5.90663e-05	0.000382324	1	1	0.19376	1	0.961917	1	0.000940029
Atopobium	0.0141698	3.60527e-08	7.42311e-11	0.920696	0.0406666	0.17256	1	1	0.0148671	0.641672	1	1	5.96944e-09	1	0.0015724	0.0902303	1	0.0591996	NA	1	1	0.97961	0.389914	1	4.63531e-08	2.99943e-08	1	0.852111	0.00326776	2.79774e-06	1	1	1	0.779164	0.0114604	1	0.95732
c_Clostridia_Unclassified_1	0.00228526	0.015096	0.595604	1	0.871938	9.94965e-08	1	1	1	1	1	0.503015	0.403377	1	0.00896692	1	9.70489e-06	0.122446	1	NA	0.29745	1	0.000337039	1	1	0.855346	0.868084	8.63522e-08	0.0115349	0.000382324	1	1	3.4876e-05	1	1	1	0.569371
Capnocytophaga	0.0195019	1	0.762943	0.0266105	0.725056	0.12542	1	1	1	1	1	0.172389	1	0.332851	0.431932	1	0.0307865	1	1	0.228808	NA	1	1	0.00771429	1	1	0.0274331	1	1	1	1	1	0.537773	1	1	1	1
c_Bacilli_Unclassified_1	0.227232	0.850504	0.101613	0.434911	1	1	0.00354243	0.00129821	0.189144	9.32821e-05	1	1	1	1	1	0.00131401	1	0.985199	0.440825	0.787133	0.856825	NA	1	1	0.721363	1	0.850355	1	1	1	1	1	1	1	1	1	1
Solobacterium	0.000102819	0.00186388	0.00710999	1	0.132791	0.737477	1	1	0.0654806	0.51683	1	1	0.00888412	0.291559	0.135659	0.212882	0.281364	0.000591607	0.439039	0.000404447	1	1	NA	1	0.243421	0.0743418	1	4.95631e-06	0.000247795	4.05485e-06	1	1	0.017087	1	1	1	1
Derxia	0.0925007	1	1	0.00132707	0.310532	0.888974	1	0.105042	1	0.182904	1	0.447509	1	1	0.274641	0.260576	1	0.938056	1	1	0.0154286	1	1	NA	1	0.77527	0.637896	1	1	1	1	1	1	1	1	1	1
Megasphaera	0.00822415	2.06456e-08	6.76034e-06	0.250764	0.0528906	0.0396361	1	1	0.00236001	1	1	0.671564	5.96944e-09	0.304333	0.0653914	0.261376	0.199223	0.0254804	4.63531e-08	1	1	1	0.256944	1	NA	2.99943e-08	0.911195	1	0.0296355	0.0580052	1	1	1	1	2.31527e-05	1	0.95732
Selenomonas	0.000312244	3.11072e-08	1.02301e-06	1	7.05042e-06	1	1	1	0.00236001	0.923747	1	1	1.16961e-10	0.288985	0.00350578	0.0902303	1	0.045773	2.99943e-08	0.977538	1	1	0.105318	1	3.27746e-08	NA	1	0.0699658	0.000263489	3.49478e-05	1	1	1	1	0.000303088	1	0.95732
Bergeyella	0.0851387	1	1	0.0114263	1	0.0416463	1	0.0581057	1	0.0148558	1	0.00370825	1	1	1	0.557571	0.00430518	1	1	0.793433	0.0532211	1	1	0.893054	0.721363	1	NA	1	1	0.869053	1	1	0.183861	1	0.357555	1	0.95732
c_Clostridia_Incertae_sedis	0.000205792	0.00327612	0.0640009	1	0.35248	0.000961655	1	1	0.380823	1	1	1	0.0361604	0.8354	0.00174801	1	0.000517999	0.0591996	0.674588	8.63522e-08	1	1	1.4192e-05	1	1	0.060637	1	NA	1.46777e-06	4.05824e-06	1	1	0.00439597	1	1	1	0.95732
Catonella	0.000418603	2.26989e-05	4.60292e-05	1	0.280133	1	1	1	0.00236001	1	1	1	1.22955e-06	0.38748	2.10481e-06	0.887832	0.0747078	0.000354398	0.00490164	0.0166615	1	1	0.000337039	1	0.0352604	0.000263489	1	7.89861e-07	NA	7.33884e-07	1	1	1	1	1	1	0.569371
Mogibacterium	4.98989e-06	2.641e-09	4.76158e-07	1	0.162334	1	1	1	0.291913	0.95866	1	1	1.86126e-07	1	0.000170822	0.0902303	0.480428	0.00114697	2.79774e-06	0.000749362	1	1	1.4192e-05	1	0.06011	4.49329e-05	1	8.11648e-06	1.46777e-06	NA	1	1	0.212884	1	1	1	0.569371
Bacteroides	1	1	1	1	1	1	1	1	1	1	1	0.671564	1	1	1	1	1	1	1	1	1	1	1	1	0.889634	1	1	1	1	1	NA	1	1	1	1	1	1
Pelomonas	1	1	1	1	1	1	1	1	1	1	1	1	1	1	1	1	1	0.335053	0.365153	1	0.295867	1	1	1	1	1	1	1	0.555361	0.432385	1	NA	0.537773	1	1	1	0.95732
c_Uncultured_rumen_bacterium_Candidate_division_sr1	0.0183246	1	1	0.174708	1	6.2667e-06	1	1	1	1	0.107365	0.958676	1	1	1	1	0.01617	0.155008	1	1.7438e-05	0.704331	1	0.0085435	1	1	1	0.229826	0.00164849	1	0.162794	1	1	NA	1	0.19631	1	0.22863
Kingella	1	1	0.651764	1	1	1	1	1	0.322941	1	1	0.671564	0.504377	1	1	1	1	1	0.05399	1	1	1	1	1	0.89777	0.240115	1	1	1	1	1	1	1	NA	1	1	1
c_Clostridia_Unclassified_2	1	0.00107201	0.00609292	0.0739689	0.300345	0.0422501	1	1	0.243647	1	1	1	0.000384843	0.982313	0.103351	1	0.106552	0.676099	0.0063669	1	1	1	1	1	4.63054e-06	7.5772e-05	0.422565	1	1	1	1	1	0.19376	1	NA	1	1
c_Gammaproteobacteria_Unclassified_1	1	1	1	0.250764	0.42924	1	1	1	0.534988	1	1	1	1	0.976016	1	1	1	0.371468	0.645778	1	1	1	0.369168	1	0.660155	0.77527	0.35942	1	1	0.869053	1	1	1	1	0.961917	NA	1
c_Tm7_phylum_sp._oral_clone_fr058_Candidate_division_tm7	0.361354	0.181406	0.975691	1	1	0.6419	1	1	1	1	1	0.958676	0.283738	1	1	1	0.265706	0.000470015	0.674588	0.272381	1	1	1	1	0.721363	0.645419	0.819605	0.852111	0.199897	0.142042	1	1	0.0571576	1	1	1	NA

## Sheet: Supplementary_Table_2h (PT)
Correlation Weight (r)	Streptococcus	Prevotella	Veillonella	Neisseria	Fusobacterium	Campylobacter	Porphyromonas	Leptotrichia	Actinomyces	Capnocytophaga	Gemella	Granulicatella	Selenomonas	p_Candidate_division_tm7_Unclassified	Haemophilus	Oribacterium	c_Clostridia_Unclassified_1	Treponema	Atopobium	Rothia	c_Betaproteobacteria_Unclassified_1	Catonella	Solobacterium	Megasphaera	Bergeyella	c_Clostridia_Unclassified_2	k_Bacteria_Unclassified	Tannerella	Kingella	c_Bacilli_Unclassified_1	c_Clostridia_Incertae_sedis	Mogibacterium	Mycoplasma	c_Tm7_phylum_sp._oral_clone_fr058_Candidate_division_tm7	Aggregatibacter	Dialister	p_Candidate_division_sr1_Unclassified	Derxia	c_Betaproteobacteria_Unclassified_2	Paludibacter	c_Uncultured_rumen_bacterium_Candidate_division_sr1	c_Gammaproteobacteria_Unclassified_1	Johnsonella	Actinobacillus
Streptococcus	1	-0.567569	0.0532177	0.00302324	-0.468546	-0.155017	-0.0180354	-0.171676	0.0173745	-0.320516	0.444964	0.568411	-0.373815	-0.415472	0.31768	-0.10089	-0.515837	-0.349714	-0.105209	0.38574	0.384931	-0.300738	-0.425089	-0.189075	0.237552	-0.152798	0.505231	-0.420292	0.19356	0.37764	-0.358894	-0.22533	-0.193812	-0.0532217	0.08559	-0.280946	-0.309761	0.117612	-0.254243	-0.163448	-0.410484	0.225153	-0.109453	0.205931
Prevotella	-0.567569	1	0.141464	-0.477299	0.224706	0.29081	-0.376555	0.123919	0.120635	-0.178949	-0.450518	-0.408711	0.583721	0.463036	-0.479427	0.143471	0.382443	0.41629	0.520773	-0.257128	-0.300777	0.280644	0.581461	0.620978	-0.578266	0.557745	-0.232106	0.16352	-0.220014	-0.183533	0.293771	0.290266	0.173023	-0.00041055	-0.11002	0.405661	0.044385	-0.309619	-0.0418881	0.108007	0.00275398	-0.178204	0.426814	-0.223819
Veillonella	0.0532177	0.141464	1	-0.0851507	-0.45512	0.352674	-0.403436	0.132948	0.350162	-0.0619155	-0.392763	0.189599	-0.0550938	0.309392	-0.243218	0.376902	-0.292856	-0.344156	0.262636	-0.0527853	-0.000147218	0.0212556	0.11894	0.340404	-0.180989	0.0988744	0.131607	-0.223167	-0.129546	0.205929	-0.0226465	0.141168	-0.331165	0.156272	-0.157761	-0.303005	-0.208202	-0.363308	-0.195176	-0.156711	-0.1162	-0.299136	0.266015	-0.315925
Neisseria	0.00302324	-0.477299	-0.0851507	1	0.0361699	-0.12594	0.436334	-0.0520862	-0.117444	0.447433	0.191495	0.245026	-0.495273	-0.262209	0.444943	-0.164469	-0.081455	-0.158529	-0.472914	0.0791654	0.132861	-0.0814571	-0.225947	-0.538807	0.516185	-0.37392	-0.018424	0.0496207	0.044182	0.221153	-0.00474348	-0.150474	-0.171831	-0.0817982	0.0215396	-0.277505	0.115557	0.273316	0.121479	0.0717043	0.295239	0.171854	-0.412705	0.293755
Fusobacterium	-0.468546	0.224706	-0.45512	0.0361699	1	-0.118687	0.291323	0.0601997	-0.119771	0.296216	0.0107399	-0.344636	0.202632	0.0138585	0.0582343	-0.084974	0.429554	0.5634	-0.00199893	-0.23786	-0.219217	0.348223	0.158902	-0.135319	0.00826476	0.0833852	-0.31519	0.436167	-0.135157	-0.267135	0.232705	0.0853255	0.387371	-0.180579	0.0525645	0.299599	0.373377	0.160148	0.287664	0.300247	0.328503	0.0471865	-0.103914	0.126503
Campylobacter	-0.155017	0.29081	0.352674	-0.12594	-0.118687	1	-0.376082	0.516553	0.492399	0.0659623	-0.370758	-0.0750541	0.51542	0.539905	-0.441406	0.477551	0.0591167	-0.0212665	0.442849	-0.078998	-0.118464	0.186832	0.41754	0.508876	-0.128737	0.34062	-0.00238703	0.111846	-0.118907	-0.00799425	0.114749	0.244447	-0.065096	0.251163	-0.247043	-0.0587452	-0.116231	-0.204996	0.0498296	-0.0989511	-0.10831	-0.144023	0.328457	-0.192465
Porphyromonas	-0.0180354	-0.376555	-0.403436	0.436334	0.291323	-0.376082	1	-0.124841	-0.331886	0.423501	0.396223	-0.0134003	-0.295668	-0.187179	0.533694	-0.201576	0.161715	0.0663366	-0.500027	-0.161642	-0.0274412	0.034167	-0.272376	-0.603429	0.395527	-0.444034	-0.198975	0.283771	-0.0975321	-0.187599	0.0933216	-0.104657	0.206318	-0.0306045	0.212334	-0.0374335	0.337655	0.22219	0.139685	0.1734	0.440395	0.153303	-0.507956	0.295991
Leptotrichia	-0.171676	0.123919	0.132948	-0.0520862	0.0601997	0.516553	-0.124841	1	0.476178	0.200811	-0.199599	-0.188615	0.290746	0.561269	-0.192528	0.295081	0.25962	0.0163818	0.258116	-0.0681927	-0.13361	0.0554338	0.408156	0.322933	-0.0400638	0.0746097	-0.0037838	0.313583	-0.102092	-0.0954761	0.202751	0.259751	-0.00222055	0.159048	-0.207089	0.00786515	0.0997047	-0.0930474	-0.0498015	-0.164243	0.0775214	-0.0598907	0.373188	-0.0323457
Actinomyces	0.0173745	0.120635	0.350162	-0.117444	-0.119771	0.492399	-0.331886	0.476178	1	-0.0068754	-0.301277	-0.135892	0.266336	0.36436	-0.280841	0.214683	0.163722	-0.0576936	0.435947	0.19603	-0.0373659	-0.00729728	0.349214	0.420446	-0.280712	0.238005	0.116756	0.155673	-0.107098	0.0661254	0.142643	0.379606	-0.0504153	0.11403	-0.195431	-0.162786	-0.0374467	-0.118078	-0.0825534	-0.206065	-0.123058	-0.0580691	0.371931	-0.269587
Capnocytophaga	-0.320516	-0.178949	-0.0619155	0.447433	0.296216	0.0659623	0.423501	0.200811	-0.0068754	1	0.12772	-0.153444	0.00483391	0.159684	0.181589	0.104305	0.175909	0.0172904	-0.305951	-0.230571	-0.230653	0.290151	0.0967299	-0.35126	0.479329	-0.220132	-0.25253	0.496077	-0.00117039	-0.195148	0.203003	0.105678	0.0605443	0.0941252	0.0332149	-0.0664345	0.238648	0.146881	0.501734	0.0748544	0.404675	0.0907948	-0.137618	0.191681
Gemella	0.444964	-0.450518	-0.392763	0.191495	0.0107399	-0.370758	0.396223	-0.199599	-0.301277	0.12772	1	0.299864	-0.283742	-0.33048	0.497691	-0.244171	-0.0151753	-0.184638	-0.366839	0.23728	0.167296	-0.039096	-0.27285	-0.480871	0.536039	-0.322214	0.095676	-0.0866353	-0.0202785	0.072187	-0.123865	0.00368838	0.0553844	-0.115794	0.244991	0.0137777	-0.0172178	0.263718	0.0281236	-0.0889613	0.0223595	0.385531	-0.207522	0.404894
Granulicatella	0.568411	-0.408711	0.189599	0.245026	-0.344636	-0.0750541	-0.0134003	-0.188615	-0.135892	-0.153444	0.299864	1	-0.391992	-0.323089	0.386487	-0.0782558	-0.411051	-0.369625	-0.112592	0.477226	0.56962	-0.259233	-0.386541	-0.190618	0.348422	-0.25763	0.489664	-0.405938	0.0833286	0.696751	-0.349302	-0.169695	-0.156347	0.0300701	0.0583494	-0.240381	-0.293102	0.151626	-0.135746	-0.146145	-0.27379	0.0990396	-0.125762	0.115656
Selenomonas	-0.373815	0.583721	-0.0550938	-0.495273	0.202632	0.51542	-0.295668	0.290746	0.266336	0.00483391	-0.283742	-0.391992	1	0.561769	-0.444987	0.266223	0.350268	0.289119	0.455674	-0.2703	-0.333844	0.240706	0.467612	0.47476	-0.320571	0.363402	-0.24997	0.318386	-0.0672232	-0.321129	0.215969	0.316523	0.212739	0.18529	-0.0139382	0.235502	0.0228788	-0.202926	-0.0136315	0.0453729	-0.0700287	-0.131305	0.337942	-0.184928
p_Candidate_division_tm7_Unclassified	-0.415472	0.463036	0.309392	-0.262209	0.0138585	0.539905	-0.187179	0.561269	0.36436	0.159684	-0.33048	-0.323089	0.561769	1	-0.436705	0.385846	0.412531	0.0458098	0.434767	-0.292393	-0.265931	0.224776	0.52898	0.550362	-0.207104	0.237248	-0.148072	0.379061	-0.285543	-0.236963	0.304084	0.477285	0.118113	0.285916	-0.112929	0.0973687	0.200551	-0.332874	-0.0424438	-0.062389	0.181144	-0.271747	0.405168	-0.270088
Haemophilus	0.31768	-0.479427	-0.243218	0.444943	0.0582343	-0.441406	0.533694	-0.192528	-0.280841	0.181589	0.497691	0.386487	-0.444987	-0.436705	1	-0.18364	-0.127534	-0.146116	-0.507528	0.376251	0.453491	-0.168247	-0.48317	-0.635066	0.51434	-0.388489	0.348832	-0.0693138	0.00810963	0.225396	-0.116424	-0.113112	-0.0315265	-0.212626	0.349782	-0.234551	-0.0143362	0.25668	-0.052899	-0.105586	0.0638051	0.401884	-0.381414	0.467283
Oribacterium	-0.10089	0.143471	0.376902	-0.164469	-0.084974	0.477551	-0.201576	0.295081	0.214683	0.104305	-0.244171	-0.0782558	0.266223	0.385846	-0.18364	1	-0.0765134	-0.0992935	0.214395	-0.206418	-0.180236	0.221149	0.170705	0.313865	-0.0428385	0.303191	-0.0685823	0.0563237	-0.220066	-0.0812195	0.141346	0.139324	-0.039613	0.0306591	-0.146558	-0.0857702	-0.269502	-0.153356	-0.133225	-0.162551	-0.0701901	-0.175717	0.21239	-0.126349
c_Clostridia_Unclassified_1	-0.515837	0.382443	-0.292856	-0.081455	0.429554	0.0591167	0.161715	0.25962	0.163722	0.175909	-0.0151753	-0.411051	0.350268	0.412531	-0.127534	-0.0765134	1	0.430418	0.164114	-0.137544	-0.144206	0.166138	0.418314	0.208317	-0.0956127	0.147617	-0.192735	0.559305	-0.065301	-0.210702	0.415908	0.436983	0.414083	0.0635343	0.0491682	0.446831	0.40704	0.109182	0.174026	0.193097	0.369596	-0.0386328	0.145925	-0.0477397
Treponema	-0.349714	0.41629	-0.344156	-0.158529	0.5634	-0.0212665	0.0663366	0.0163818	-0.0576936	0.0172904	-0.184638	-0.369625	0.289119	0.0458098	-0.146116	-0.0992935	0.430418	1	0.20438	-0.238592	-0.289271	0.306998	0.314221	0.139923	-0.257398	0.31717	-0.292656	0.281561	0.00258145	-0.118183	0.323826	0.117059	0.425869	0.0173557	-0.0654265	0.451833	0.325877	0.00393344	0.156896	0.306369	0.21631	-0.0585874	0.0282436	0.00717886
Atopobium	-0.105209	0.520773	0.262636	-0.472914	-0.00199893	0.442849	-0.500027	0.258116	0.435947	-0.305951	-0.366839	-0.112592	0.455674	0.434767	-0.507528	0.214395	0.164114	0.20438	1	0.0284444	-0.0505843	0.13337	0.483039	0.714559	-0.400045	0.418066	0.0544791	0.110086	-0.0724381	0.056945	0.150851	0.40545	0.127414	0.112547	-0.212993	0.29019	-0.00220712	-0.223984	-0.0189342	-0.0300053	-0.0839543	-0.185113	0.484477	-0.227391
Rothia	0.38574	-0.257128	-0.0527853	0.0791654	-0.23786	-0.078998	-0.161642	-0.0681927	0.19603	-0.230571	0.23728	0.477226	-0.2703	-0.292393	0.376251	-0.206418	-0.137544	-0.238592	0.0284444	1	0.800735	-0.192596	-0.226637	-0.131942	0.112751	-0.00872615	0.736211	-0.34307	0.127579	0.522243	-0.354657	0.00576967	-0.136752	-0.0451643	-0.0198751	-0.129871	-0.206021	0.168138	-0.153627	-0.137551	-0.254339	0.216479	0.0653926	0.070936
c_Betaproteobacteria_Unclassified_1	0.384931	-0.300777	-0.000147218	0.132861	-0.219217	-0.118464	-0.0274412	-0.13361	-0.0373659	-0.230653	0.167296	0.56962	-0.333844	-0.265931	0.453491	-0.180236	-0.144206	-0.289271	-0.0505843	0.800735	1	-0.263364	-0.32283	-0.149577	0.163214	-0.0874914	0.780272	-0.309082	0.127047	0.448431	-0.395834	-0.0836983	-0.0832889	-0.126279	0.0891439	-0.164604	-0.142507	0.220175	-0.127631	-0.0984843	-0.125144	0.144381	-0.0550769	0.166257
Catonella	-0.300738	0.280644	0.0212556	-0.0814571	0.348223	0.186832	0.034167	0.0554338	-0.00729728	0.290151	-0.039096	-0.259233	0.240706	0.224776	-0.168247	0.221149	0.166138	0.306998	0.13337	-0.192596	-0.263364	1	0.320038	0.0397295	-0.048401	0.232499	-0.27512	0.166236	-0.0856743	-0.160064	0.331634	0.259179	0.273217	-0.12925	-0.0319976	0.220625	-0.0806048	-0.13324	0.0464677	0.16247	0.0928724	0.04515	-0.0295513	-0.111756
Solobacterium	-0.425089	0.581461	0.11894	-0.225947	0.158902	0.41754	-0.272376	0.408156	0.349214	0.0967299	-0.27285	-0.386541	0.467612	0.52898	-0.48317	0.170705	0.418314	0.314221	0.483039	-0.226637	-0.32283	0.320038	1	0.551367	-0.255684	0.291239	-0.313149	0.314195	-0.171173	-0.186786	0.515861	0.363094	0.207288	0.0865459	-0.14591	0.266919	0.217191	-0.192182	0.0739411	0.0375126	0.187391	-0.130085	0.344648	-0.138067
Megasphaera	-0.189075	0.620978	0.340404	-0.538807	-0.135319	0.508876	-0.603429	0.322933	0.420446	-0.35126	-0.480871	-0.190618	0.47476	0.550362	-0.635066	0.313865	0.208317	0.139923	0.714559	-0.131942	-0.149577	0.0397295	0.551367	1	-0.517237	0.482873	-0.0385408	0.0445856	-0.136519	-0.0682672	0.148958	0.383893	0.067802	0.0898131	-0.277356	0.209562	0.00435863	-0.245117	-0.187132	-0.0613239	-0.163899	-0.193477	0.534773	-0.254184
Bergeyella	0.237552	-0.578266	-0.180989	0.516185	0.00826476	-0.128737	0.395527	-0.0400638	-0.280712	0.479329	0.536039	0.348422	-0.320571	-0.207104	0.51434	-0.0428385	-0.0956127	-0.257398	-0.400045	0.112751	0.163214	-0.048401	-0.255684	-0.517237	1	-0.440164	0.0991356	0.0648694	0.229812	0.0355638	-0.0294866	-0.0500383	-0.0129684	-0.00959776	0.161378	-0.148045	0.0018745	0.297109	0.226045	-0.0975184	0.116275	0.395409	-0.340752	0.437592
c_Clostridia_Unclassified_2	-0.152798	0.557745	0.0988744	-0.37392	0.0833852	0.34062	-0.444034	0.0746097	0.238005	-0.220132	-0.322214	-0.25763	0.363402	0.237248	-0.388489	0.303191	0.147617	0.31717	0.418066	-0.00872615	-0.0874914	0.232499	0.291239	0.482873	-0.440164	1	-0.00778097	0.0183245	-0.139816	-0.058187	0.021743	0.136499	0.126335	-0.0482552	-0.128072	0.267336	-0.0768126	-0.120601	-0.0179676	0.0879348	-0.250462	-0.136805	0.334986	-0.171164
k_Bacteria_Unclassified	0.505231	-0.232106	0.131607	-0.018424	-0.31519	-0.00238703	-0.198975	-0.0037838	0.116756	-0.25253	0.095676	0.489664	-0.24997	-0.148072	0.348832	-0.0685823	-0.192735	-0.292656	0.0544791	0.736211	0.780272	-0.27512	-0.313149	-0.0385408	0.0991356	-0.00778097	1	-0.286048	0.145697	0.434511	-0.321357	-0.0823098	-0.135779	-0.0274739	-0.0377644	-0.226677	-0.196841	0.0712946	-0.078713	-0.10657	-0.246659	0.118234	-0.00475002	0.12948
Tannerella	-0.420292	0.16352	-0.223167	0.0496207	0.436167	0.111846	0.283771	0.313583	0.155673	0.496077	-0.0866353	-0.405938	0.318386	0.379061	-0.0693138	0.0563237	0.559305	0.281561	0.110086	-0.34307	-0.309082	0.166236	0.314195	0.0445856	0.0648694	0.0183245	-0.286048	1	0.00473122	-0.311413	0.326607	0.235428	0.369508	0.0907364	-0.00790718	0.218019	0.344068	-0.00480079	0.348462	0.257814	0.31635	-0.0228472	-0.0496652	0.0357127
Kingella	0.19356	-0.220014	-0.129546	0.044182	-0.135157	-0.118907	-0.0975321	-0.102092	-0.107098	-0.00117039	-0.0202785	0.0833286	-0.0672232	-0.285543	0.00810963	-0.220066	-0.065301	0.00258145	-0.0724381	0.127579	0.127047	-0.0856743	-0.171173	-0.136519	0.229812	-0.139816	0.145697	0.00473122	1	0.0301758	-0.176212	-0.138065	-0.0346829	0.00250279	-0.106721	0.0655993	-0.0749734	0.325566	0.184336	-0.0238607	-0.14912	0.257961	-0.0634829	0.110268
c_Bacilli_Unclassified_1	0.37764	-0.183533	0.205929	0.221153	-0.267135	-0.00799425	-0.187599	-0.0954761	0.0661254	-0.195148	0.072187	0.696751	-0.321129	-0.236963	0.225396	-0.0812195	-0.210702	-0.118183	0.056945	0.522243	0.448431	-0.160064	-0.186786	-0.0682672	0.0355638	-0.058187	0.434511	-0.311413	0.0301758	1	-0.243507	-0.0276151	-0.192442	-0.0506956	-0.0180981	-0.113359	-0.215231	0.0292788	-0.151276	-0.00161033	-0.216359	-0.0429232	-0.0282982	-0.128996
c_Clostridia_Incertae_sedis	-0.358894	0.293771	-0.0226465	-0.00474348	0.232705	0.114749	0.0933216	0.202751	0.142643	0.203003	-0.123865	-0.349302	0.215969	0.304084	-0.116424	0.141346	0.415908	0.323826	0.150851	-0.354657	-0.395834	0.331634	0.515861	0.148958	-0.0294866	0.021743	-0.321357	0.326607	-0.176212	-0.243507	1	0.422091	0.222023	0.00627584	0.109093	0.152287	0.168997	-0.182868	0.0371667	0.130934	0.224316	-0.0752786	0.153256	-0.117721
Mogibacterium	-0.22533	0.290266	0.141168	-0.150474	0.0853255	0.244447	-0.104657	0.259751	0.379606	0.105678	0.00368838	-0.169695	0.316523	0.477285	-0.113112	0.139324	0.436983	0.117059	0.40545	0.00576967	-0.0836983	0.259179	0.363094	0.383893	-0.0500383	0.136499	-0.0823098	0.235428	-0.138065	-0.0276151	0.422091	1	0.150551	-0.0755232	-0.0391696	0.137627	0.0993954	-0.163661	0.0234541	-0.0913533	0.186362	0.0855529	0.289068	-0.112212
Mycoplasma	-0.193812	0.173023	-0.331165	-0.171831	0.387371	-0.065096	0.206318	-0.00222055	-0.0504153	0.0605443	0.0553844	-0.156347	0.212739	0.118113	-0.0315265	-0.039613	0.414083	0.425869	0.127414	-0.136752	-0.0832889	0.273217	0.207288	0.067802	-0.0129684	0.126335	-0.135779	0.369508	-0.0346829	-0.192442	0.222023	0.150551	1	0.0344082	0.147169	0.489555	0.190414	0.104714	0.111353	0.170898	0.16361	0.0419101	-0.124469	-0.038923
c_Tm7_phylum_sp._oral_clone_fr058_Candidate_division_tm7	-0.0532217	-0.00041055	0.156272	-0.0817982	-0.180579	0.251163	-0.0306045	0.159048	0.11403	0.0941252	-0.115794	0.0300701	0.18529	0.285916	-0.212626	0.0306591	0.0635343	0.0173557	0.112547	-0.0451643	-0.126279	-0.12925	0.0865459	0.0898131	-0.00959776	-0.0482552	-0.0274739	0.0907364	0.00250279	-0.0506956	0.00627584	-0.0755232	0.0344082	1	-0.0532192	-0.0585217	0.1721	-0.19841	0.0393639	-0.0575768	0.104132	-0.279084	0.153279	-0.228736
Aggregatibacter	0.08559	-0.11002	-0.157761	0.0215396	0.0525645	-0.247043	0.212334	-0.207089	-0.195431	0.0332149	0.244991	0.0583494	-0.0139382	-0.112929	0.349782	-0.146558	0.0491682	-0.0654265	-0.212993	-0.0198751	0.0891439	-0.0319976	-0.14591	-0.277356	0.161378	-0.128072	-0.0377644	-0.00790718	-0.106721	-0.0180981	0.109093	-0.0391696	0.147169	-0.0532192	1	0.0708585	-0.00555897	0.111984	-0.0174084	0.167203	0.00291221	0.129695	-0.0627305	0.0653001
Dialister	-0.280946	0.405661	-0.303005	-0.277505	0.299599	-0.0587452	-0.0374335	0.00786515	-0.162786	-0.0664345	0.0137777	-0.240381	0.235502	0.0973687	-0.234551	-0.0857702	0.446831	0.451833	0.29019	-0.129871	-0.164604	0.220625	0.266919	0.209562	-0.148045	0.267336	-0.226677	0.218019	0.0655993	-0.113359	0.152287	0.137627	0.489555	-0.0585217	0.0708585	1	0.102187	0.0178913	0.140856	0.193456	0.0687304	0.129715	0.0937716	0.0688019
p_Candidate_division_sr1_Unclassified	-0.309761	0.044385	-0.208202	0.115557	0.373377	-0.116231	0.337655	0.0997047	-0.0374467	0.238648	-0.0172178	-0.293102	0.0228788	0.200551	-0.0143362	-0.269502	0.40704	0.325877	-0.00220712	-0.206021	-0.142507	-0.0806048	0.217191	0.00435863	0.0018745	-0.0768126	-0.196841	0.344068	-0.0749734	-0.215231	0.168997	0.0993954	0.190414	0.1721	-0.00555897	0.102187	1	0.113407	0.332468	0.352506	0.580626	-0.159141	-0.198666	0.095324
Derxia	0.117612	-0.309619	-0.363308	0.273316	0.160148	-0.204996	0.22219	-0.0930474	-0.118078	0.146881	0.263718	0.151626	-0.202926	-0.332874	0.25668	-0.153356	0.109182	0.00393344	-0.223984	0.168138	0.220175	-0.13324	-0.192182	-0.245117	0.297109	-0.120601	0.0712946	-0.00480079	0.325566	0.0292788	-0.182868	-0.163661	0.104714	-0.19841	0.111984	0.0178913	0.113407	1	0.243319	0.0732214	0.0154397	0.315287	-0.0307125	0.28888
c_Betaproteobacteria_Unclassified_2	-0.254243	-0.0418881	-0.195176	0.121479	0.287664	0.0498296	0.139685	-0.0498015	-0.0825534	0.501734	0.0281236	-0.135746	-0.0136315	-0.0424438	-0.052899	-0.133225	0.174026	0.156896	-0.0189342	-0.153627	-0.127631	0.0464677	0.0739411	-0.187132	0.226045	-0.0179676	-0.078713	0.348462	0.184336	-0.151276	0.0371667	0.0234541	0.111353	0.0393639	-0.0174084	0.140856	0.332468	0.243319	1	0.159059	0.291583	0.139137	-0.127444	0.157263
Paludibacter	-0.163448	0.108007	-0.156711	0.0717043	0.300247	-0.0989511	0.1734	-0.164243	-0.206065	0.0748544	-0.0889613	-0.146145	0.0453729	-0.062389	-0.105586	-0.162551	0.193097	0.306369	-0.0300053	-0.137551	-0.0984843	0.16247	0.0375126	-0.0613239	-0.0975184	0.0879348	-0.10657	0.257814	-0.0238607	-0.00161033	0.130934	-0.0913533	0.170898	-0.0575768	0.167203	0.193456	0.352506	0.0732214	0.159059	1	0.174873	-0.155623	-0.258282	0.00746081
c_Uncultured_rumen_bacterium_Candidate_division_sr1	-0.410484	0.00275398	-0.1162	0.295239	0.328503	-0.10831	0.440395	0.0775214	-0.123058	0.404675	0.0223595	-0.27379	-0.0700287	0.181144	0.0638051	-0.0701901	0.369596	0.21631	-0.0839543	-0.254339	-0.125144	0.0928724	0.187391	-0.163899	0.116275	-0.250462	-0.246659	0.31635	-0.14912	-0.216359	0.224316	0.186362	0.16361	0.104132	0.00291221	0.0687304	0.580626	0.0154397	0.291583	0.174873	1	-0.199463	-0.186169	-0.026307
c_Gammaproteobacteria_Unclassified_1	0.225153	-0.178204	-0.299136	0.171854	0.0471865	-0.144023	0.153303	-0.0598907	-0.0580691	0.0907948	0.385531	0.0990396	-0.131305	-0.271747	0.401884	-0.175717	-0.0386328	-0.0585874	-0.185113	0.216479	0.144381	0.04515	-0.130085	-0.193477	0.395409	-0.136805	0.118234	-0.0228472	0.257961	-0.0429232	-0.0752786	0.0855529	0.0419101	-0.279084	0.129695	0.129715	-0.159141	0.315287	0.139137	-0.155623	-0.199463	1	-0.206206	0.621429
Johnsonella	-0.109453	0.426814	0.266015	-0.412705	-0.103914	0.328457	-0.507956	0.373188	0.371931	-0.137618	-0.207522	-0.125762	0.337942	0.405168	-0.381414	0.21239	0.145925	0.0282436	0.484477	0.0653926	-0.0550769	-0.0295513	0.344648	0.534773	-0.340752	0.334986	-0.00475002	-0.0496652	-0.0634829	-0.0282982	0.153256	0.289068	-0.124469	0.153279	-0.0627305	0.0937716	-0.198666	-0.0307125	-0.127444	-0.258282	-0.186169	-0.206206	1	-0.27794
Actinobacillus	0.205931	-0.223819	-0.315925	0.293755	0.126503	-0.192465	0.295991	-0.0323457	-0.269587	0.191681	0.404894	0.115656	-0.184928	-0.270088	0.467283	-0.126349	-0.0477397	0.00717886	-0.227391	0.070936	0.166257	-0.111756	-0.138067	-0.254184	0.437592	-0.171164	0.12948	0.0357127	0.110268	-0.128996	-0.117721	-0.112212	-0.038923	-0.228736	0.0653001	0.0688019	0.095324	0.28888	0.157263	0.00746081	-0.026307	0.621429	-0.27794	1
Benjamini-Hochberg-Yekutieli P-adjust	Streptococcus	Prevotella	Veillonella	Neisseria	Fusobacterium	Campylobacter	Porphyromonas	Leptotrichia	Actinomyces	Capnocytophaga	Gemella	Granulicatella	Selenomonas	p_Candidate_division_tm7_Unclassified	Haemophilus	Oribacterium	c_Clostridia_Unclassified_1	Treponema	Atopobium	Rothia	c_Betaproteobacteria_Unclassified_1	Catonella	Solobacterium	Megasphaera	Bergeyella	c_Clostridia_Unclassified_2	k_Bacteria_Unclassified	Tannerella	Kingella	c_Bacilli_Unclassified_1	c_Clostridia_Incertae_sedis	Mogibacterium	Mycoplasma	c_Tm7_phylum_sp._oral_clone_fr058_Candidate_division_tm7	Aggregatibacter	Dialister	p_Candidate_division_sr1_Unclassified	Derxia	c_Betaproteobacteria_Unclassified_2	Paludibacter	c_Uncultured_rumen_bacterium_Candidate_division_sr1	c_Gammaproteobacteria_Unclassified_1	Johnsonella	Actinobacillus
Streptococcus	NA	8.24571e-07	1	1	0.000741097	1	1	1	1	0.0733172	0.000935666	1.29614e-06	0.00934158	0.00175645	0.0305312	1	5.62281e-05	0.0318616	1	0.0118405	0.008728	0.214545	0.00144543	0.602115	0.301098	1	6.91504e-05	0.00356662	1	0.0161704	0.0312663	0.505616	1	1	1	0.230423	0.0909468	1	0.63516	1	0.00691753	0.761452	1	0.722456
Prevotella	2.06143e-06	NA	1	0.00023656	0.384575	0.0953971	0.00659771	1	1	0.897143	0.000898981	0.00328233	1.30184e-06	0.000279099	0.000120982	1	0.00517509	0.00339178	4.19836e-05	0.316813	0.0974089	0.258753	1.53553e-06	2.35524e-08	1.93497e-06	8.0686e-06	0.406065	1	1	0.861708	0.101112	0.150367	1	1	1	0.00664068	1	0.164412	1	1	1	1	0.00267839	0.523076
Veillonella	1	1	NA	1	0.000960511	0.0167619	0.00323589	1	0.0252145	1	0.00561087	0.630922	1	0.0435658	0.208239	0.0277167	0.0843462	0.0337541	0.170973	1	1	1	1	0.0180387	0.825779	1	1	0.346151	1	0.722483	1	1	0.0694437	1	1	0.184887	0.721106	0.137656	1	1	1	0.187419	0.165797	0.135437
Neisseria	1	0.000105138	1	NA	1	1	0.000996885	1	1	0.00104106	0.645916	0.217452	9.04732e-05	0.115247	0.000425724	1	1	1	0.000169519	1	1	1	0.277008	3.96275e-06	2.45513e-05	0.0132923	1	1	1	0.677275	1	1	1	1	1	0.230423	1	0.290326	1	1	0.155523	1	0.00395257	0.187867
Fusobacterium	0.000296439	0.290598	0.00288153	1	NA	1	0.0783423	1	1	0.122465	1	0.01771	0.386868	1	1	1	0.00158037	5.49696e-06	1	0.383847	0.511227	0.198478	0.808753	1	1	1	0.0819882	0.00234389	1	0.342129	0.427165	1	0.0138869	1	1	0.184887	0.0316537	1	0.312918	0.362784	0.0757279	1	1	1
Campylobacter	0.945273	0.0660611	0.0313689	1	1	NA	0.00659771	5.39107e-05	0.000423581	1	0.0104709	1	3.84118e-05	6.46909e-06	0.000460329	0.000933965	1	1	0.000573901	1	1	0.893825	0.00160713	1.68476e-05	1	0.0338252	1	1	1	1	1	0.373197	1	1	1	1	1	0.72381	1	1	1	1	0.0325027	0.858074
Porphyromonas	1	0.00495584	0.0145615	0.000872275	0.0940107	0.00857702	NA	1	0.0406949	0.00248013	0.00558219	1	0.0654892	0.511179	1.91118e-05	0.790742	0.998507	1	6.95183e-05	1	1	1	0.103559	7.30173e-08	0.00367056	0.00146284	0.733318	0.0918447	1	0.849884	1	1	1	1	1	1	0.0560449	0.567272	1	1	0.00289447	1	8.88018e-05	0.187867
Leptotrichia	0.75253	1	1	1	1	3.84118e-05	1	NA	0.000501458	0.714015	0.572817	0.630922	0.0714997	3.17888e-06	0.542444	0.210943	0.195628	1	0.181882	1	1	1	0.0021763	0.030184	1	1	1	0.0485406	1	1	0.617469	0.280279	1	1	1	1	1	1	1	1	1	1	0.0111375	1
Actinomyces	1	1	0.0313689	1	1	8.47162e-05	0.0271299	0.000334306	NA	1	0.0733808	1	0.112132	0.0088328	0.0860287	0.720085	0.998507	1	0.000681351	0.674401	1	1	0.0162093	0.00101226	0.11871	0.303264	1	1	1	1	1	0.012503	1	1	1	1	1	1	1	1	1	1	0.0111375	0.233233
Capnocytophaga	0.0345022	0.645629	1	0.000668995	0.0874752	1	0.00155008	0.823425	1	NA	1	1	1	0.797921	0.625947	1	0.94027	1	0.057405	0.420692	0.447896	0.243015	1	0.0132088	0.000141874	0.405582	0.302763	0.000173113	1	0.845243	0.617469	1	1	1	1	1	0.46454	1	0.000252725	1	0.00691753	1	1	0.858074
Gemella	0.000779721	0.000326902	0.0149623	0.815893	1	0.00951901	0.00365324	0.823425	0.0959803	1	NA	0.0647478	0.079384	0.0250635	6.33351e-05	0.542671	1	0.770304	0.00806755	0.383847	1	1	0.103559	6.5426e-05	1.65091e-05	0.0505316	1	1	1	1	1	1	1	1	1	1	1	0.332489	1	1	1	0.0149216	0.547292	0.00685515
Granulicatella	2.06143e-06	0.00167063	0.699615	0.298997	0.0295166	1	1	0.911332	1	1	0.0733808	NA	0.00514282	0.0300345	0.0035938	1	0.00192693	0.0182011	1	0.000237468	1.19125e-06	0.280279	0.00478168	0.602115	0.0194368	0.218668	0.000122837	0.00525172	1	4.80957e-11	0.0323203	1	1	1	1	0.438443	0.134003	1	1	1	0.22932	1	1	1
Selenomonas	0.00667255	4.83742e-07	1	0.000120631	0.562717	3.84118e-05	0.0731938	0.159285	0.186331	1	0.109153	0.00514282	NA	3.17888e-06	0.000425724	0.350412	0.0145851	0.0883232	0.000350625	0.251746	0.0476987	0.408323	0.000221967	8.30158e-05	0.0418223	0.0171486	0.302763	0.0485406	1	0.0958814	0.518399	0.0830899	1	1	1	0.438443	1	0.72381	1	1	1	1	0.0277554	0.927279
p_Candidate_division_tm7_Unclassified	0.00195161	0.000195369	0.0689791	0.207445	1	2.58763e-05	0.624775	6.35776e-06	0.0189274	1	0.0355066	0.0337888	3.07236e-06	NA	0.000527741	0.0277167	0.00192693	1	0.000681351	0.151954	0.215718	0.495573	1.7043e-05	2.19635e-06	0.512656	0.303264	1	0.012766	0.830385	0.580085	0.0809394	0.000946952	1	0.993124	1	1	0.733318	0.164412	1	1	0.901786	0.302787	0.00451858	0.233233
Haemophilus	0.0356197	0.000105138	0.277652	0.000668995	1	0.000690493	1.91118e-05	0.893437	0.146105	0.894211	0.000158338	0.00522734	0.000584155	0.000832762	NA	1	1	1	6.06674e-05	0.0142042	0.000779414	1	0.000116709	1.05899e-08	2.45513e-05	0.00886022	0.0383265	1	1	0.677275	1	1	1	1	0.2225	0.438443	1	0.3584	1	1	1	0.0134587	0.00999938	0.000789838
Oribacterium	1	1	0.0207875	1	1	0.000155661	0.527161	0.158207	0.564419	1	0.244202	1	0.112132	0.00453517	0.622718	NA	1	1	0.432672	0.576885	1	0.495573	0.675807	0.0379895	1	0.076729	1	1	1	1	1	1	1	1	1	1	0.233756	1	1	1	1	1	0.530589	1
c_Clostridia_Unclassified_1	3.74854e-05	0.00420476	0.0899693	1	0.00189645	1	0.899792	0.28798	1	0.908166	1	0.00328233	0.0182314	0.00180994	1	1	NA	0.00279292	0.994204	1	1	1	0.00160713	0.458085	1	1	0.75631	7.26337e-06	1	0.696781	0.00574636	0.00338692	0.00621276	1	1	0.00142813	0.0125407	1	1	1	0.0218644	1	1	1
Treponema	0.0139395	0.00130453	0.0337541	1	5.49696e-06	1	1	1	1	1	0.70868	0.00910054	0.0714997	1	1	1	0.00158037	NA	0.497477	0.383847	0.124584	0.214545	0.0368947	1	0.204182	0.0542867	0.135733	0.0927685	1	1	0.051923	1	0.00558585	1	1	0.00142813	0.0618155	1	1	0.362784	0.578888	1	1	1
Atopobium	1	1.19953e-05	0.18103	0.000237327	1	0.000690493	6.95183e-05	0.28798	0.00236757	0.102053	0.0110012	1	0.000400714	0.000832762	4.55006e-05	0.720085	0.998507	0.542703	NA	1	1	1	0.000116709	6.18848e-12	0.00367056	0.00314218	1	1	1	1	1	0.00669889	1	1	1	0.208066	1	0.567272	1	1	1	1	0.000216285	0.51704
Rothia	0.00509133	0.147646	1	1	0.315522	1	0.899792	1	0.716698	0.448739	0.274177	0.000189974	0.109455	0.065123	0.00473472	0.762804	1	0.279094	1	NA	0	0.842664	0.277008	1	1	1	2.07667e-13	0.0280207	1	3.84492e-05	0.0312663	1	1	1	1	1	0.721106	1	1	1	0.345614	0.838918	1	1
c_Betaproteobacteria_Unclassified_1	0.00509133	0.0563946	1	1	0.41385	1	1	1	1	0.448739	0.939634	1.29614e-06	0.0272564	0.108644	0.000346406	1	1	0.0883232	1	0	NA	0.280279	0.0340683	1	1	1	0	0.049153	1	0.0013239	0.00992299	1	1	1	1	1	1	0.567272	1	1	1	1	1	1
Catonella	0.0536363	0.0827353	1	1	0.0293558	0.808699	1	1	1	0.132554	1	0.166604	0.1966	0.25598	0.774791	0.720085	0.998507	0.0647845	1	0.689453	0.215718	NA	0.0350255	1	1	0.321913	0.184373	0.995861	1	1	0.0512903	0.280279	0.332682	1	1	0.524864	1	1	1	1	1	1	1	1
Solobacterium	0.00165192	4.83742e-07	1	0.439953	1	0.0017857	0.119093	0.00598484	0.0252145	1	0.138345	0.00522734	0.000258961	1.02258e-05	0.000115907	1	0.00192693	0.0594912	0.000116709	0.433138	0.0605658	0.198478	NA	2.19635e-06	0.204182	0.100968	0.0819882	0.0485406	1	0.849884	0.000112293	0.0198183	1	1	1	0.250236	0.677275	0.804897	1	1	0.860103	1	0.0265536	1
Megasphaera	0.56059	7.06573e-08	0.034073	2.77393e-05	1	4.2119e-05	2.92069e-07	0.090552	0.0035429	0.0301915	0.000261704	0.630922	0.000215841	4.3927e-06	2.11797e-08	0.18045	0.578634	1	6.18848e-12	1	1	1	6.16748e-06	NA	2.45513e-05	0.000353227	1	1	1	1	1	0.012503	1	1	1	0.5949	1	0.415471	1	1	1	1	3.57379e-05	0.318051
Bergeyella	0.248733	4.83742e-07	0.791371	5.50889e-05	1	1	0.00365324	1	0.146105	0.000283747	3.30182e-05	0.0166601	0.0365945	0.363821	4.09189e-05	1	1	0.185228	0.00239055	1	1	1	0.147011	1.15064e-05	NA	0.00146284	1	1	1	1	1	1	1	1	1	1	1	0.198873	0.932831	1	1	0.0134587	0.0275527	0.00219585
c_Clostridia_Unclassified_2	0.951561	1.34477e-06	1	0.00930458	1	0.0234175	0.000964823	1	0.353743	0.532326	0.0427575	0.166604	0.0124717	0.200029	0.00354409	0.199495	1	0.0592219	0.00130924	1	1	0.459876	0.0673123	6.42231e-05	0.000823444	NA	1	1	1	1	1	1	1	1	1	0.250236	1	1	1	1	0.348951	1	0.0282664	1
k_Bacteria_Unclassified	5.18628e-05	0.259882	1	1	0.0629829	1	0.533735	1	1	0.331484	1	0.000122837	0.163026	0.943434	0.0114979	1	0.720295	0.0883232	1	2.07667e-13	0	0.258753	0.0368947	1	1	1	NA	0.090968	1	0.00189565	0.051923	1	1	1	1	0.490447	0.733318	1	1	1	0.353665	1	1	1
Tannerella	0.00178331	0.791545	0.419025	1	0.00175792	1	0.0918447	0.104016	1	0.000173113	1	0.00328233	0.0368912	0.00547114	1	1	7.26337e-06	0.103076	1	0.0350258	0.0835601	1	0.0368947	1	1	1	0.148857	NA	1	0.111182	0.051923	0.429554	0.0219357	1	1	0.524864	0.0541698	1	0.116458	0.696484	0.0954734	1	1	1
Kingella	0.53143	0.304979	1	1	1	1	1	1	1	1	1	1	1	0.0722074	1	0.720085	1	1	1	1	1	1	0.675807	1	0.342469	1	1	1	NA	1	0.944136	1	1	1	1	1	1	0.164412	1	1	1	0.385492	1	1
c_Bacilli_Unclassified_1	0.0062194	0.623995	0.550463	0.462595	0.161002	1	0.624775	1	1	0.758707	1	4.80957e-11	0.0365945	0.200029	0.291266	1	0.578634	1	1	2.56328e-05	0.000794342	1	0.531177	1	1	1	0.00151652	0.0486421	1	NA	0.354503	1	1	1	1	1	0.677275	1	1	1	0.578888	1	1	1
c_Clostridia_Incertae_sedis	0.0107585	0.0657231	1	1	0.337236	1	1	0.823425	1	0.714015	1	0.0166601	0.321765	0.0485636	1	1	0.00192693	0.0528063	1	0.0267997	0.00661532	0.198478	2.80732e-05	1	1	1	0.0815932	0.0439132	1	0.551449	NA	0.0043969	1	1	1	1	1	0.916366	1	1	0.554227	1	1	1
Mogibacterium	0.304581	0.0660611	1	1	1	0.269531	1	0.28798	0.0150036	1	1	0.866701	0.0369288	0.000157825	1	1	0.00158037	1	0.0020612	1	1	0.280279	0.0106714	0.00424058	1	1	1	0.273353	1	1	0.00574636	NA	1	1	1	1	1	1	1	1	0.860103	1	0.100244	1
Mycoplasma	0.53143	0.688368	0.0416662	1	0.00925792	1	0.498523	1	1	1	1	1	0.33353	1	1	1	0.00192693	0.00279292	1	1	1	0.258753	0.387415	1	1	1	1	0.0156684	1	0.845243	0.480428	1	NA	1	1	0.000494263	0.791796	1	1	1	1	1	1	1
c_Tm7_phylum_sp._oral_clone_fr058_Candidate_division_tm7	1	1	1	1	0.832208	0.257208	1	1	1	1	1	1	0.518185	0.0722074	0.371487	1	1	1	1	1	1	1	1	1	1	1	1	1	1	1	1	1	1	NA	1	1	1	0.749864	1	1	1	0.28375	1	0.51704
Aggregatibacter	1	1	1	1	1	0.267923	0.458786	0.823425	0.716698	1	0.244202	1	1	1	0.0114979	1	1	1	0.432672	1	1	1	0.977375	0.104114	1	1	1	1	1	1	1	1	1	1	NA	1	1	1	1	1	1	1	1	1
Dialister	0.0898642	0.00177085	0.0771553	0.159523	0.0853323	1	1	1	1	1	1	0.232589	0.214405	1	0.245528	1	0.00142813	0.00168829	0.0856742	1	1	0.495573	0.114691	0.458085	1	0.181507	0.432748	0.371779	1	1	1	1	0.000494263	1	1	NA	1	1	1	1	1	1	1	1
p_Candidate_division_sr1_Unclassified	0.0430801	1	0.550463	1	0.0135659	1	0.0240192	1	1	0.428806	1	0.074446	1	0.403778	1	0.350412	0.00209012	0.0528063	1	0.576885	1	1	0.324496	1	1	1	0.733318	0.0280207	1	0.677275	1	1	1	1	1	1	NA	1	0.133084	0.202331	1.6316e-06	1	0.610333	1
Derxia	1	0.0456701	0.0275312	0.1659	1	0.620377	0.387479	1	1	1	0.166245	1	0.386868	0.0246231	0.155826	1	1	1	0.372251	1	0.511227	1	0.509768	0.216974	0.0795493	1	1	1	0.499479	1	0.87273	1	1	1	1	1	1	NA	0.712236	1	1	0.138148	1	0.188963
c_Betaproteobacteria_Unclassified_2	0.173225	1	0.654878	1	0.0977869	1	1	1	1	0.000173113	1	1	1	1	1	1	0.94027	1	1	1	1	1	1	0.603007	0.355364	1	1	0.0280207	1	1	1	1	1	1	1	1	0.0570361	0.415471	NA	1	0.155523	1	1	1
Paludibacter	0.843677	1	1	1	0.0853323	1	0.781291	1	0.640385	1	1	1	1	1	1	1	0.720295	0.0647845	1	1	1	1	1	1	1	1	1	0.165829	1	1	1	1	1	1	1	0.784792	0.0505826	1	1	NA	0.9678	1	0.191176	1
c_Uncultured_rumen_bacterium_Candidate_division_sr1	0.00217097	1	1	0.109589	0.0454367	1	0.000964823	1	1	0.00461169	1	0.120695	1	0.556986	1	1	0.00780872	0.441058	1	0.316813	1	1	0.531177	0.89473	1	0.246319	0.30651	0.0485406	1	0.677275	0.480428	1	1	1	1	1	1.6316e-06	1	0.312918	1	NA	1	0.747916	1
c_Gammaproteobacteria_Unclassified_1	0.304581	0.645629	0.0803222	1	1	1	1	1	1	1	0.00663183	1	1	0.100929	0.00221731	1	1	1	0.702231	0.512672	1	1	1	0.596185	0.00367056	1	1	1	1	1	1	1	1	0.993124	1	1	1	0.164412	1	1	0.77714	NA	0.547292	6.80465e-08
Johnsonella	1	0.000892796	0.176159	0.00219587	1	0.0325027	5.92012e-05	0.019127	0.0167063	1	0.508177	1	0.0256204	0.00225929	0.00411739	0.720085	1	1	0.000116709	1	1	1	0.0177024	4.46724e-06	0.0233138	0.0367464	1	1	1	1	1	0.150367	1	1	1	1	0.733318	1	1	0.696484	0.860103	0.957762	NA	0.227706
Actinobacillus	0.444588	0.290598	0.0615623	0.109589	1	0.760376	0.0731938	1	0.183255	0.772267	0.0045701	1	0.518185	0.101267	0.00019746	1	1	1	0.361928	1	1	1	1	0.181744	0.000823444	1	1	1	1	1	1	1	1	1	1	1	1	0.215958	1	1	1	6.80465e-08	0.128085	NA

## Sheet: Supplementary_Table_2i (SAL)
Correlation Weight (r)	Prevotella	Veillonella	Streptococcus	p_Candidate_division_tm7_Unclassified	Neisseria	Campylobacter	Selenomonas	Porphyromonas	Derxia	Oribacterium	c_Clostridia_Unclassified_1	Capnocytophaga	Haemophilus	Granulicatella	Actinomyces	Fusobacterium	Rothia	Gemella	c_Uncultured_rumen_bacterium_Candidate_division_sr1	Atopobium	Leptotrichia	Megasphaera	c_Tm7_phylum_sp._oral_clone_fr058_Candidate_division_tm7	c_Betaproteobacteria_Unclassified_1	p_Candidate_division_tm7_Uncultured_bacterium_Candidate_division_tm7	Bergeyella	Catonella	p_Candidate_division_sr1_Unclassified	Pelomonas	Solobacterium	c_Bacilli_Unclassified_1	Treponema	k_Bacteria_Unclassified	c_Clostridia_Unclassified_2	Uncultured_bacterium_oral_clone_bs003__Candidate_division_tm7	Kingella	c_Candidate_division_tm7_single-cell_isolate_tm7a_Candidate_division_tm7	c_Clostridia_Incertae_sedis	Mogibacterium	Ralstonia	Dialister	Propionibacterium	c_Betaproteobacteria_Unclassified_2	Rf9	Mycoplasma
Prevotella	1	0.347308	-0.216481	-0.0412538	-0.35187	0.0313893	0.168345	-0.118097	-0.187155	-0.0388185	-0.0530071	-0.313372	0.0669747	-0.0893207	0.0113944	0.134479	-0.229343	-0.374764	-0.0794474	0.156609	0.0664765	0.282453	0.00403541	-0.0173016	-0.0937966	-0.163751	-0.0313918	-0.176057	-0.0062131	0.0712113	-0.071187	0.223424	-0.0964384	0.23583	-0.0873357	0.123932	0.246957	-0.0615136	0.252692	-0.115873	0.267419	0.00592339	-0.0471517	-0.0625104	0.0880548
Veillonella	0.347308	1	0.340426	-0.302698	-0.202496	-0.0872583	-0.123277	-0.243948	-0.0777615	0.228095	-0.43553	-0.09893	0.0335687	-0.0302521	0.320647	-0.106254	0.0815626	0.0304453	-0.37332	0.493054	0.28043	0.331939	-0.254739	0.180456	-0.403732	-0.0609519	0.146626	-0.486803	0.0601673	-0.0381332	0.0325356	-0.102281	0.243523	0.417209	0.0801602	0.31948	-0.0322451	-0.189389	0.108163	-0.0799116	-0.0858729	0.0128894	0.0130786	-0.442209	-0.129583
Streptococcus	-0.216481	0.340426	1	-0.53191	0.161576	-0.254443	-0.474453	-0.048153	0.221087	0.0376363	-0.483268	0.180702	0.17444	0.435364	0.426058	-0.032048	0.609511	0.374781	-0.418715	0.2528	0.192473	-0.0905846	-0.197803	0.545451	-0.372956	-0.0165181	0.0247069	-0.340311	-0.0701381	-0.131735	0.331479	-0.110032	0.578627	0.262669	0.181534	0.222014	-0.0401908	-0.203028	-0.166471	-0.0864855	-0.129353	0.174409	-0.0417639	-0.470606	-0.172751
p_Candidate_division_tm7_Unclassified	-0.0412538	-0.302698	-0.53191	1	-0.298806	0.142531	0.349147	0.0444552	-0.445183	-0.114241	0.606342	-0.214764	-0.103282	-0.125881	-0.38515	-0.108014	-0.554431	-0.0138923	0.529945	-0.0430197	-0.2476	0.113591	0.593373	-0.533728	0.629973	-0.0142152	0.000175957	0.431384	0.0808384	0.358619	-0.378379	0.197361	-0.537245	-0.313655	0.0303151	-0.251683	0.081312	0.376152	0.280201	0.184516	0.14279	-0.0231217	-0.145955	0.416716	0.152254
Neisseria	-0.35187	-0.202496	0.161576	-0.298806	1	-0.116998	-0.347443	0.241977	0.37484	-0.0295132	-0.0882521	0.583395	0.298488	0.118173	-0.0881562	0.0619375	0.367438	0.29933	-0.0893085	-0.167779	0.150112	-0.171297	-0.301335	0.18177	-0.104725	0.410962	-0.0235219	-0.0145552	-0.000665796	-0.138508	0.180112	-0.310105	0.207456	0.0479587	-0.0113385	0.178393	-0.075047	0.0282579	-0.305035	-0.174084	-0.272468	-0.0513906	0.412373	-0.118353	-0.166636
Campylobacter	0.0313893	-0.0872583	-0.254443	0.142531	-0.116998	1	0.466327	-0.323461	-0.136264	0.313441	0.156645	-0.130637	-0.124525	-0.11639	-0.0609385	-0.0231507	-0.236012	-0.149553	-0.0718934	-0.0255031	-0.232188	0.277885	0.106369	-0.187057	0.0249959	-0.0370118	0.146848	0.044746	-0.146648	0.178345	-0.0972249	0.0495766	-0.243806	0.0460126	-0.0102589	-0.129228	0.0217139	-0.0332766	-0.00533723	-0.0258152	-0.0597648	0.0576557	0.00277106	-0.0933684	0.225117
Selenomonas	0.168345	-0.123277	-0.474453	0.349147	-0.347443	0.466327	1	-0.307554	-0.079835	-0.0441443	0.23599	-0.278415	-0.411347	-0.260891	-0.104889	-0.245474	-0.327542	-0.37572	-0.00420563	-0.0390436	-0.234959	0.320572	0.227044	-0.299548	0.177983	-0.303764	-0.00161305	0.0582193	-0.107666	0.0981782	-0.235955	0.121131	-0.252535	0.0118203	0.0419945	-0.162258	0.0810391	-0.070121	0.160415	0.129634	0.0923902	0.0945087	-0.151188	-0.00179607	0.123339
Porphyromonas	-0.118097	-0.243948	-0.048153	0.0444552	0.241977	-0.323461	-0.307554	1	0.0100512	-0.0787461	0.129332	0.230107	0.331803	-0.14265	-0.160748	0.382147	-0.182283	0.25407	0.296749	-0.287714	0.055419	-0.44848	0.0276979	-0.189505	0.173732	0.234421	0.114537	0.303715	-0.0884091	-0.00151348	-0.0576745	0.0295444	-0.190223	-0.418579	0.0343302	-0.0693268	0.114211	0.220009	0.0161063	-0.0988155	0.0467012	-0.269044	0.132412	0.247855	0.0473399
Derxia	-0.187155	-0.0777615	0.221087	-0.445183	0.37484	-0.136264	-0.079835	0.0100512	1	0.141675	-0.324601	0.25563	0.11716	0.129934	0.154997	-0.040467	0.447272	0.0621007	-0.105822	-0.23722	0.232572	-0.0319898	-0.391048	0.352836	-0.248617	-0.11226	0.0142261	0.0295721	0.0912531	-0.401763	0.0946547	-0.125168	0.290992	0.169207	-0.0483088	0.104895	-0.151056	-0.233992	-0.351504	0.0907278	-0.192315	0.107845	0.229899	-0.147583	-0.150604
Oribacterium	-0.0388185	0.228095	0.0376363	-0.114241	-0.0295132	0.313441	-0.0441443	-0.0787461	0.141675	1	-0.14924	0.0411836	0.0620595	-0.106857	0.17089	0.11921	-0.00680651	0.124784	-0.0570412	-0.0619096	0.216547	0.0268281	-0.259288	-0.0280545	-0.137718	-0.0159043	0.487567	-0.0764479	0.145449	-0.196383	-0.228626	0.00988668	0.0692129	0.0462399	-0.0146974	0.157446	-0.0635866	0.211523	0.00847801	0.0879962	-0.159437	0.0505408	-0.120528	-0.107197	0.0300035
c_Clostridia_Unclassified_1	-0.0530071	-0.43553	-0.483268	0.606342	-0.0882521	0.156645	0.23599	0.129332	-0.324601	-0.14924	1	-0.0202527	-0.132176	-0.105052	-0.304087	0.0359538	-0.519121	-0.0889568	0.527631	-0.0959251	-0.143943	-0.0270828	0.489884	-0.553865	0.463768	-0.0589352	-0.0228824	0.574831	-0.00761099	0.546588	-0.182192	0.17672	-0.62039	-0.16275	-0.0463208	-0.247586	0.0497494	0.502328	0.174443	0.222233	0.196209	0.0831004	-0.0551978	0.421353	0.0580454
Capnocytophaga	-0.313372	-0.09893	0.180702	-0.214764	0.583395	-0.130637	-0.278415	0.230107	0.25563	0.0411836	-0.0202527	1	0.333012	0.172873	-0.0277262	0.226895	0.262348	0.399593	0.0417786	-0.137416	0.27257	-0.229328	-0.227861	0.184316	0.0579367	0.479849	0.136633	0.219122	-0.0993435	-0.174466	0.0211161	-0.196008	0.113238	0.0730797	0.0845417	0.223464	0.109588	0.0187367	-0.241521	-0.194271	-0.0790914	0.0209551	0.376913	-0.0741859	0.0367237
Haemophilus	0.0669747	0.0335687	0.17444	-0.103282	0.298488	-0.124525	-0.411347	0.331803	0.11716	0.0620595	-0.132176	0.333012	1	0.0070949	-0.226731	0.47689	0.0686434	0.297372	-0.114134	-0.182307	0.207862	-0.146379	-0.192561	0.0821369	-0.139481	0.359738	0.118223	0.107811	-0.138249	-0.200517	-0.113258	0.0778845	0.109967	-0.0486668	-0.0479899	0.229746	-0.0457878	-0.0179506	-0.245433	-0.216438	-0.0701483	-0.134153	0.100841	-0.0516663	0.139433
Granulicatella	-0.0893207	-0.0302521	0.435364	-0.125881	0.118173	-0.11639	-0.260891	-0.14265	0.129934	-0.106857	-0.105052	0.172873	0.0070949	1	0.291612	-0.0160327	0.382604	0.404553	-0.129325	0.217298	0.035754	0.169861	0.0800776	0.294858	0.0761156	0.0431964	0.0827872	0.0470034	0.100927	0.103984	0.362117	-0.068933	0.306158	0.265017	0.122187	0.293752	0.0437921	-0.179639	-0.149688	0.0444121	0.008775	0.388131	0.128924	-0.224783	-0.0728517
Actinomyces	0.0113944	0.320647	0.426058	-0.38515	-0.0881562	-0.0609385	-0.104889	-0.160748	0.154997	0.17089	-0.304087	-0.0277262	-0.226731	0.291612	1	-0.169735	0.384923	0.0812061	-0.313982	0.0903807	0.0262476	0.203779	-0.305474	0.396405	-0.451979	-0.36277	0.124692	-0.388631	0.146976	-0.122081	0.142632	-0.200992	0.328966	0.20831	-0.0835668	0.179085	-0.085495	-0.121582	-0.132942	0.0853142	-0.229031	0.244192	-0.230686	-0.353897	-0.182069
Fusobacterium	0.134479	-0.106254	-0.032048	-0.108014	0.0619375	-0.0231507	-0.245474	0.382147	-0.040467	0.11921	0.0359538	0.226895	0.47689	-0.0160327	-0.169735	1	-0.0536243	0.134996	0.0216394	-0.0598824	0.151149	-0.102226	-0.221242	0.00813439	0.0182357	0.298569	0.391091	0.197735	-0.122595	0.0300661	-0.203469	0.446873	-0.018057	-0.0534356	-0.0239084	0.0633737	0.0336232	0.255592	0.0473519	-0.143651	0.166551	-0.0175342	0.079525	0.241879	0.242985
Rothia	-0.229343	0.0815626	0.609511	-0.554431	0.367438	-0.236012	-0.327542	-0.182283	0.447272	-0.00680651	-0.519121	0.262348	0.0686434	0.382604	0.384923	-0.0536243	1	0.181817	-0.426498	0.0211885	-0.018099	-0.101021	-0.43991	0.694398	-0.415102	0.142154	0.0756253	-0.348026	0.0318271	-0.14692	0.265369	-0.157268	0.772388	0.273584	-0.117797	0.297853	-0.182747	-0.265278	-0.252943	-0.0961254	-0.160643	0.302483	0.154647	-0.418015	-0.137085
Gemella	-0.374764	0.0304453	0.374781	-0.0138923	0.29933	-0.149553	-0.37572	0.25407	0.0621007	0.124784	-0.0889568	0.399593	0.297372	0.404553	0.0812061	0.134996	0.181817	1	0.100946	-0.00655252	0.227154	0.00540343	-0.0395123	0.00961048	0.0128881	0.267983	0.374436	0.161844	0.156497	0.0509905	0.0104147	0.00766335	0.00288469	0.031141	0.176842	0.282133	-0.0214799	0.152026	-0.162075	0.0201718	0.0154586	0.176172	0.108263	-0.294586	-0.0346041
c_Uncultured_rumen_bacterium_Candidate_division_sr1	-0.0794474	-0.37332	-0.418715	0.529945	-0.0893085	-0.0718934	-0.00420563	0.296749	-0.105822	-0.0570412	0.527631	0.0417786	-0.114134	-0.129325	-0.313982	0.0216394	-0.426498	0.100946	1	-0.353301	-0.159503	-0.19741	0.387547	-0.547861	0.529836	0.0118978	-0.0655574	0.695675	0.132742	0.118852	-0.245503	0.244045	-0.649265	-0.378413	0.0135658	-0.230131	0.151973	0.476175	0.0429285	0.136908	0.237398	-0.0656241	0.0643004	0.49644	0.130355
Atopobium	0.156609	0.493054	0.2528	-0.0430197	-0.167779	-0.0255031	-0.0390436	-0.287714	-0.23722	-0.0619096	-0.0959251	-0.137416	-0.182307	0.217298	0.0903807	-0.0598824	0.0211885	-0.00655252	-0.353301	1	0.116806	0.448426	0.135618	0.086195	0.0123351	0.00036846	0.0653929	-0.266983	-0.0862954	0.380953	0.185881	0.0594529	0.0583255	0.491863	0.0944958	0.233226	0.00737556	-0.04267	0.421812	-0.178879	0.150415	0.0950997	0.07858	-0.222737	0.0585083
Leptotrichia	0.0664765	0.28043	0.192473	-0.2476	0.150112	-0.232188	-0.234959	0.055419	0.232572	0.216547	-0.143943	0.27257	0.207862	0.035754	0.0262476	0.151149	-0.018099	0.227154	-0.159503	0.116806	1	0.108861	-0.169971	0.0197921	-0.139278	0.0766781	0.10379	-0.0703236	0.147558	-0.096094	0.185114	-0.0589234	0.0249933	0.216709	0.213905	0.119792	0.014795	0.0508394	0.0984436	-0.00515228	0.0292628	-0.0751271	0.205012	-0.126991	-0.0383696
Megasphaera	0.282453	0.331939	-0.0905846	0.113591	-0.171297	0.277885	0.320572	-0.44848	-0.0319898	0.0268281	-0.0270828	-0.229328	-0.146379	0.169861	0.203779	-0.102226	-0.101021	0.00540343	-0.19741	0.448426	0.108861	1	0.00261052	0.0234785	-0.185698	-0.269766	0.026077	-0.156222	0.0990587	0.248137	-0.0771194	0.122101	-0.0344649	0.617609	0.00942468	0.085901	-0.0150438	-0.0873576	0.264294	0.132324	-0.117956	0.23976	0.103052	-0.238898	0.0396774
c_Tm7_phylum_sp._oral_clone_fr058_Candidate_division_tm7	0.00403541	-0.254739	-0.197803	0.593373	-0.301335	0.106369	0.227044	0.0276979	-0.391048	-0.259288	0.489884	-0.227861	-0.192561	0.0800776	-0.305474	-0.221242	-0.43991	-0.0395123	0.387547	0.135618	-0.169971	0.00261052	1	-0.344016	0.50502	-0.127518	-0.146004	0.430244	-0.0269812	0.303153	-0.0353911	0.162633	-0.466973	-0.153283	0.145046	-0.177295	0.182112	0.115736	0.191205	0.0677699	0.24643	0.0576873	-0.0707248	0.287981	0.164192
c_Betaproteobacteria_Unclassified_1	-0.0173016	0.180456	0.545451	-0.533728	0.18177	-0.187057	-0.299548	-0.189505	0.352836	-0.0280545	-0.553865	0.184316	0.0821369	0.294858	0.396405	0.00813439	0.694398	0.00961048	-0.547861	0.086195	0.0197921	0.0234785	-0.344016	1	-0.498638	-0.0732422	-0.0353827	-0.371535	0.0549951	-0.265329	0.134886	-0.244822	0.753608	0.386434	-0.105515	0.362385	-0.114995	-0.401275	-0.249203	-0.104316	-0.230457	0.181218	0.0264136	-0.253558	-0.135433
p_Candidate_division_tm7_Uncultured_bacterium_Candidate_division_tm7	-0.0937966	-0.403732	-0.372956	0.629973	-0.104725	0.0249959	0.177983	0.173732	-0.248617	-0.137718	0.463768	0.0579367	-0.139481	0.0761156	-0.451979	0.0182357	-0.415102	0.0128881	0.529836	0.0123351	-0.139278	-0.185698	0.50502	-0.498638	1	0.167119	0.0586468	0.477389	-0.0397902	0.251753	-0.0966095	0.182307	-0.508825	-0.348722	0.148964	-0.0827493	0.282462	0.270645	0.186044	-0.0194085	0.27165	-0.00226945	0.0650443	0.389049	0.210377
Bergeyella	-0.163751	-0.0609519	-0.0165181	-0.0142152	0.410962	-0.0370118	-0.303764	0.234421	-0.11226	-0.0159043	-0.0589352	0.479849	0.359738	0.0431964	-0.36277	0.298569	0.142154	0.267983	0.0118978	0.00036846	0.0766781	-0.269766	-0.127518	-0.0732422	0.167119	1	0.0832058	0.0775728	-0.133302	0.0179159	0.159144	-0.115466	0.0562234	-0.194715	0.0963788	0.273777	0.072029	0.0640551	-0.0210853	-0.37316	0.118353	-0.0727156	0.291554	-0.0471791	0.00171624
Catonella	-0.0313918	0.146626	0.0247069	0.000175957	-0.0235219	0.146848	-0.00161305	0.114537	0.0142261	0.487567	-0.0228824	0.136633	0.118223	0.0827872	0.124692	0.391091	0.0756253	0.374436	-0.0655574	0.0653929	0.10379	0.026077	-0.146004	-0.0353827	0.0586468	0.0832058	1	0.0173632	0.119435	0.0982477	-0.314425	0.219034	-0.00805765	0.169947	-0.11607	0.133524	-0.281547	0.383177	0.0390757	0.0227016	0.0029073	0.156622	-0.112344	-0.139707	0.0589613
p_Candidate_division_sr1_Unclassified	-0.176057	-0.486803	-0.340311	0.431384	-0.0145552	0.044746	0.0582193	0.303715	0.0295721	-0.0764479	0.574831	0.219122	0.107811	0.0470034	-0.388631	0.197735	-0.348026	0.161844	0.695675	-0.266983	-0.0703236	-0.156222	0.430244	-0.371535	0.477389	0.0775728	0.0173632	1	-0.0809975	0.078476	-0.177579	0.37444	-0.560409	-0.237051	-0.0149857	-0.137292	0.128445	0.272261	-0.0828875	0.0454751	0.307326	0.0401418	0.180265	0.472846	0.364871
Pelomonas	-0.0062131	0.0601673	-0.0701381	0.0808384	-0.000665796	-0.146648	-0.107666	-0.0884091	0.0912531	0.145449	-0.00761099	-0.0993435	-0.138249	0.100927	0.146976	-0.122595	0.0318271	0.156497	0.132742	-0.0862954	0.147558	0.0990587	-0.0269812	0.0549951	-0.0397902	-0.133302	0.119435	-0.0809975	1	-0.0599854	-0.358503	0.00128921	0.0482415	0.0128033	0.0298891	0.0741832	-0.168906	0.143027	0.0761952	0.672085	-0.00383182	0.209703	-0.0945586	-0.000393719	-0.189853
Solobacterium	0.0712113	-0.0381332	-0.131735	0.358619	-0.138508	0.178345	0.0981782	-0.00151348	-0.401763	-0.196383	0.546588	-0.174466	-0.200517	0.103984	-0.122081	0.0300661	-0.14692	0.0509905	0.118852	0.380953	-0.096094	0.248137	0.303153	-0.265329	0.251753	0.0179159	0.0982477	0.078476	-0.0599854	1	0.125764	0.077948	-0.313488	0.185031	-0.0242161	-0.014719	0.0287693	0.280486	0.318222	0.0959482	0.0444829	0.214458	0.00612173	-0.0539063	0.0138724
c_Bacilli_Unclassified_1	-0.071187	0.0325356	0.331479	-0.378379	0.180112	-0.0972249	-0.235955	-0.0576745	0.0946547	-0.228626	-0.182192	0.0211161	-0.113258	0.362117	0.142632	-0.203469	0.265369	0.0104147	-0.245503	0.185881	0.185114	-0.0771194	-0.0353911	0.134886	-0.0966095	0.159144	-0.314425	-0.177579	-0.358503	0.125764	1	-0.27565	0.165764	0.0902677	0.138422	0.166803	0.176127	-0.235793	-0.0373719	-0.48893	-0.0183198	0.0581093	0.147695	-0.335412	-0.0535907
Treponema	0.223424	-0.102281	-0.110032	0.197361	-0.310105	0.0495766	0.121131	0.0295444	-0.125168	0.00988668	0.17672	-0.196008	0.0778845	-0.068933	-0.200992	0.446873	-0.157268	0.00766335	0.244045	0.0594529	-0.0589234	0.122101	0.162633	-0.244822	0.182307	-0.115466	0.219034	0.37444	0.00128921	0.077948	-0.27565	1	-0.264008	-0.000983788	0.118723	-0.135265	0.0997246	0.29983	0.351975	0.0710637	0.435589	0.0905162	-0.0581573	0.170562	0.546442
k_Bacteria_Unclassified	-0.0964384	0.243523	0.578627	-0.537245	0.207456	-0.243806	-0.252535	-0.190223	0.290992	0.0692129	-0.62039	0.113238	0.109967	0.306158	0.328966	-0.018057	0.772388	0.00288469	-0.649265	0.0583255	0.0249933	-0.0344649	-0.466973	0.753608	-0.508825	0.0562234	-0.00805765	-0.560409	0.0482415	-0.313488	0.165764	-0.264008	1	0.298574	-0.0318904	0.193241	-0.186556	-0.361269	-0.245805	-0.0326505	-0.337279	0.103538	-0.0314602	-0.336718	-0.306436
c_Clostridia_Unclassified_2	0.23583	0.417209	0.262669	-0.313655	0.0479587	0.0460126	0.0118203	-0.418579	0.169207	0.0462399	-0.16275	0.0730797	-0.0486668	0.265017	0.20831	-0.0534356	0.273584	0.031141	-0.378413	0.491863	0.216709	0.617609	-0.153283	0.386434	-0.348722	-0.194715	0.169947	-0.237051	0.0128033	0.185031	0.0902677	-0.000983788	0.298574	1	-0.0154486	0.182418	-0.0286976	-0.244975	-0.00424095	-0.0528583	-0.110325	0.252277	0.154797	-0.359947	0.0243792
Uncultured_bacterium_oral_clone_bs003__Candidate_division_tm7	-0.0873357	0.0801602	0.181534	0.0303151	-0.0113385	-0.0102589	0.0419945	0.0343302	-0.0483088	-0.0146974	-0.0463208	0.0845417	-0.0479899	0.122187	-0.0835668	-0.0239084	-0.117797	0.176842	0.0135658	0.0944958	0.213905	0.00942468	0.145046	-0.105515	0.148964	0.0963788	-0.11607	-0.0149857	0.0298891	-0.0242161	0.138422	0.118723	-0.0318904	-0.0154486	1	-0.0351197	0.526462	-0.0985657	0.0151752	-0.0783628	0.30663	-0.0439815	-0.00956496	-0.302515	0.111638
Kingella	0.123932	0.31948	0.222014	-0.251683	0.178393	-0.129228	-0.162258	-0.0693268	0.104895	0.157446	-0.247586	0.223464	0.229746	0.293752	0.179085	0.0633737	0.297853	0.282133	-0.230131	0.233226	0.119792	0.085901	-0.177295	0.362385	-0.0827493	0.273777	0.133524	-0.137292	0.0741832	-0.014719	0.166803	-0.135265	0.193241	0.182418	-0.0351197	1	0.0596016	-0.0876144	-0.118617	-0.185085	0.105405	0.397607	0.114232	-0.391974	0.110886
c_Candidate_division_tm7_single-cell_isolate_tm7a_Candidate_division_tm7	0.246957	-0.0322451	-0.0401908	0.081312	-0.075047	0.0217139	0.0810391	0.114211	-0.151056	-0.0635866	0.0497494	0.109588	-0.0457878	0.0437921	-0.085495	0.0336232	-0.182747	-0.0214799	0.151973	0.00737556	0.014795	-0.0150438	0.182112	-0.114995	0.282462	0.072029	-0.281547	0.128445	-0.168906	0.0287693	0.176127	0.0997246	-0.186556	-0.0286976	0.526462	0.0596016	1	-0.182855	0.0784129	-0.306364	0.295476	0.0300822	0.0321108	-0.142687	0.192906
c_Clostridia_Incertae_sedis	-0.0615136	-0.189389	-0.203028	0.376152	0.0282579	-0.0332766	-0.070121	0.220009	-0.233992	0.211523	0.502328	0.0187367	-0.0179506	-0.179639	-0.121582	0.255592	-0.265278	0.152026	0.476175	-0.04267	0.0508394	-0.0873576	0.115736	-0.401275	0.270645	0.0640551	0.383177	0.272261	0.143027	0.280486	-0.235793	0.29983	-0.361269	-0.244975	-0.0985657	-0.0876144	-0.182855	1	0.361752	0.100554	0.109642	-0.0469778	-0.271146	0.280137	0.00639858
Mogibacterium	0.252692	0.108163	-0.166471	0.280201	-0.305035	-0.00533723	0.160415	0.0161063	-0.351504	0.00847801	0.174443	-0.241521	-0.245433	-0.149688	-0.132942	0.0473519	-0.252943	-0.162075	0.0429285	0.421812	0.0984436	0.264294	0.191205	-0.249203	0.186044	-0.0210853	0.0390757	-0.0828875	0.0761952	0.318222	-0.0373719	0.351975	-0.245805	-0.00424095	0.0151752	-0.118617	0.0784129	0.361752	1	0.0254719	0.210638	-0.0184998	-0.0658086	0.149423	0.193225
Ralstonia	-0.115873	-0.0799116	-0.0864855	0.184516	-0.174084	-0.0258152	0.129634	-0.0988155	0.0907278	0.0879962	0.222233	-0.194271	-0.216438	0.0444121	0.0853142	-0.143651	-0.0961254	0.0201718	0.136908	-0.178879	-0.00515228	0.132324	0.0677699	-0.104316	-0.0194085	-0.37316	0.0227016	0.0454751	0.672085	0.0959482	-0.48893	0.0710637	-0.0326505	-0.0528583	-0.0783628	-0.185085	-0.306364	0.100554	0.0254719	1	-0.0581631	0.324542	-0.0924189	0.11673	-0.251573
Dialister	0.267419	-0.0858729	-0.129353	0.14279	-0.272468	-0.0597648	0.0923902	0.0467012	-0.192315	-0.159437	0.196209	-0.0790914	-0.0701483	0.008775	-0.229031	0.166551	-0.160643	0.0154586	0.237398	0.150415	0.0292628	-0.117956	0.24643	-0.230457	0.27165	0.118353	0.0029073	0.307326	-0.00383182	0.0444829	-0.0183198	0.435589	-0.337279	-0.110325	0.30663	0.105405	0.295476	0.109642	0.210638	-0.0581631	1	0.121252	0.0987675	-0.0256866	0.353123
Propionibacterium	0.00592339	0.0128894	0.174409	-0.0231217	-0.0513906	0.0576557	0.0945087	-0.269044	0.107845	0.0505408	0.0831004	0.0209551	-0.134153	0.388131	0.244192	-0.0175342	0.302483	0.176172	-0.0656241	0.0950997	-0.0751271	0.23976	0.0576873	0.181218	-0.00226945	-0.0727156	0.156622	0.0401418	0.209703	0.214458	0.0581093	0.0905162	0.103538	0.252277	-0.0439815	0.397607	0.0300822	-0.0469778	-0.0184998	0.324542	0.121252	1	0.122744	-0.303253	0.0515201
c_Betaproteobacteria_Unclassified_2	-0.0471517	0.0130786	-0.0417639	-0.145955	0.412373	0.00277106	-0.151188	0.132412	0.229899	-0.120528	-0.0551978	0.376913	0.100841	0.128924	-0.230686	0.079525	0.154647	0.108263	0.0643004	0.07858	0.205012	0.103052	-0.0707248	0.0264136	0.0650443	0.291554	-0.112344	0.180265	-0.0945586	0.00612173	0.147695	-0.0581573	-0.0314602	0.154797	-0.00956496	0.114232	0.0321108	-0.271146	-0.0658086	-0.0924189	0.0987675	0.122744	1	-0.0315696	0.124212
Rf9	-0.0625104	-0.442209	-0.470606	0.416716	-0.118353	-0.0933684	-0.00179607	0.247855	-0.147583	-0.107197	0.421353	-0.0741859	-0.0516663	-0.224783	-0.353897	0.241879	-0.418015	-0.294586	0.49644	-0.222737	-0.126991	-0.238898	0.287981	-0.253558	0.389049	-0.0471791	-0.139707	0.472846	-0.000393719	-0.0539063	-0.335412	0.170562	-0.336718	-0.359947	-0.302515	-0.391974	-0.142687	0.280137	0.149423	0.11673	-0.0256866	-0.303253	-0.0315696	1	0.132106
Mycoplasma	0.0880548	-0.129583	-0.172751	0.152254	-0.166636	0.225117	0.123339	0.0473399	-0.150604	0.0300035	0.0580454	0.0367237	0.139433	-0.0728517	-0.182069	0.242985	-0.137085	-0.0346041	0.130355	0.0585083	-0.0383696	0.0396774	0.164192	-0.135433	0.210377	0.00171624	0.0589613	0.364871	-0.189853	0.0138724	-0.0535907	0.546442	-0.306436	0.0243792	0.111638	0.110886	0.192906	0.00639858	0.193225	-0.251573	0.353123	0.0515201	0.124212	0.132106	1
BY
Benjamini-Hochberg-Yekutieli P-adjust	Prevotella	Veillonella	Streptococcus	p_Candidate_division_tm7_Unclassified	Neisseria	Campylobacter	Selenomonas	Porphyromonas	Derxia	Oribacterium	c_Clostridia_Unclassified_1	Capnocytophaga	Haemophilus	Granulicatella	Actinomyces	Fusobacterium	Rothia	Gemella	c_Uncultured_rumen_bacterium_Candidate_division_sr1	Atopobium	Leptotrichia	Megasphaera	c_Tm7_phylum_sp._oral_clone_fr058_Candidate_division_tm7	c_Betaproteobacteria_Unclassified_1	p_Candidate_division_tm7_Uncultured_bacterium_Candidate_division_tm7	Bergeyella	Catonella	p_Candidate_division_sr1_Unclassified	Pelomonas	Solobacterium	c_Bacilli_Unclassified_1	Treponema	k_Bacteria_Unclassified	c_Clostridia_Unclassified_2	Uncultured_bacterium_oral_clone_bs003__Candidate_division_tm7	Kingella	c_Candidate_division_tm7_single.cell_isolate_tm7a_Candidate_division_tm7	c_Clostridia_Incertae_sedis	Mogibacterium	Ralstonia	Dialister	Propionibacterium	c_Betaproteobacteria_Unclassified_2	Rf9	Mycoplasma
Prevotella	NA	0.169233	0.91245	1	0.19276	1	1	1	1	1	1	0.502133	1	1	1	1	0.646027	0.111647	1	1	1	0.909536	1	1	1	1	1	1	1	1	1	1	1	0.816617	1	1	1	1	0.898108	1	0.867941	1	1	1	1
Veillonella	0.451288	NA	0.114855	0.211549	1	1	1	0.890928	1	1	0.00906716	1	1	1	0.255633	1	1	1	0.0531069	0.00731981	1	0.49145	0.660902	1	0.0292354	1	1	0.00444664	1	1	1	1	0.527712	0.0486408	1	0.656319	1	1	1	1	1	1	1	0.0218275	1
Streptococcus	1	0.178167	NA	0.000381319	1	1	0.0189718	1	1	1	0.00203416	1	1	0.109396	0.0737717	1	1.92372e-05	0.111647	0.0185715	1	1	1	1	0.000304612	0.0580989	1	1	0.114855	1	1	0.331218	1	6.09986e-05	0.657781	1	1	1	1	1	1	1	1	1	0.0108381	1
p_Candidate_division_tm7_Unclassified	1	0.292914	0.000699695	NA	0.320554	1	0.224887	1	0.0395217	1	3.45111e-05	1	1	1	0.0836885	1	0.0002506	1	0.000562322	1	1	1	0.000140757	0.000430518	1.73061e-05	1	1	0.0161377	1	0.254238	0.254997	1	0.000315586	0.332644	1	1	1	0.127887	0.868457	1	1	1	1	0.028221	1
Neisseria	0.451288	1	1	0.217848	NA	1	0.224887	0.890928	0.132522	1	1	0.0002385	0.609586	1	1	1	0.0621391	0.502838	1	1	1	1	0.32677	1	1	0.117737	1	1	1	1	1	0.539912	0.920993	1	1	1	1	1	0.603336	1	0.867941	1	0.225612	1	1
Campylobacter	1	1	0.570685	1	1	NA	0.0189718	0.479288	1	1	1	1	1	1	1	1	0.601693	1	1	1	1	0.909536	1	1	1	1	1	1	1	1	1	1	0.527712	1	1	1	1	1	1	1	1	1	1	1	1
Selenomonas	1	1	0.00464492	0.0808253	0.19276	0.0379436	NA	0.532159	1	1	0.81437	0.883724	0.116375	0.80386	1	1	0.145328	0.111647	1	1	1	0.512143	0.895241	0.271606	1	0.594294	1	1	1	1	1	1	0.516104	1	1	1	1	1	1	1	1	1	1	1	1
Porphyromonas	1	0.713963	1	1	0.831533	1	0.370371	NA	1	1	1	1	0.394428	1	1	0.135608	1	0.836342	0.270239	0.745685	1	0.0236147	1	1	1	1	1	0.23282	1	1	1	1	1	0.0486408	1	1	1	0.952503	1	1	1	1	1	0.561754	1
Derxia	1	1	0.889097	0.00878261	0.161562	1	1	1	NA	1	0.166727	0.975213	1	1	1	1	0.012278	1	1	1	1	1	0.0583124	0.0906659	0.615671	1	1	1	1	0.154924	1	1	0.271011	1	1	1	1	0.795987	0.304735	1	1	1	1	1	1
Oribacterium	1	0.879635	1	1	1	1	1	1	1	NA	1	1	1	1	1	1	1	1	1	1	1	1	0.650855	1	1	1	0.0172748	1	1	1	1	1	1	1	1	1	1	1	1	1	1	1	1	1	1
c_Clostridia_Unclassified_1	1	0.0272015	0.00406833	3.45111e-05	1	1	0.782889	1	0.291772	1	NA	1	1	1	0.284249	1	0.000971287	1	0.000562322	1	1	1	0.00526778	0.000304612	0.00593896	1	1	0.000184956	1	0.00144543	1	1	7.68756e-06	1	1	1	1	0.00969053	1	1	1	1	1	0.028221	1
Capnocytophaga	0.753199	1	1	0.856367	0.0002385	1	0.524997	0.956641	0.975213	1	1	NA	0.394428	1	1	1	0.40967	0.111647	1	1	1	1	0.895241	1	1	0.0231298	1	0.91803	1	1	1	1	1	1	1	1	1	1	0.898108	1	1	1	0.313167	1	1
Haemophilus	1	1	1	1	0.320554	1	0.0775831	0.479288	1	1	1	0.383279	NA	1	0.899925	0.0258216	1	0.502838	1	1	1	1	1	1	1	0.1976	1	1	1	1	1	1	1	1	1	1	1	1	0.898108	1	1	1	1	1	1
Granulicatella	1	1	0.0136745	1	1	1	0.680189	1	1	1	1	1	1	NA	0.343981	1	0.0446346	0.111647	1	1	1	1	1	0.281235	1	1	1	1	1	1	0.254997	1	0.220786	0.657781	1	0.76756	1	1	1	1	1	0.229447	1	0.721122	1
Actinomyces	1	0.218773	0.0163937	0.0415797	1	1	1	1	1	1	0.246349	1	1	0.535081	NA	1	0.0446346	1	0.198132	1	1	1	0.32677	0.0402521	0.00784455	0.1976	1	0.0502723	1	1	1	1	0.162191	1	1	1	1	1	1	1	1	1	1	0.104309	1
Fusobacterium	1	1	1	1	1	1	0.781595	0.180811	1	1	1	1	0.0258216	1	1	NA	1	1	1	1	1	1	0.933519	1	1	0.594294	0.167471	1	1	1	1	0.0361986	1	1	1	1	1	0.650595	1	1	1	1	1	0.594976	1
Rothia	1	1	5.77115e-05	0.0002506	0.161562	1	0.311416	1	0.0395217	1	0.000693777	0.955897	1	0.133904	0.0836885	1	NA	1	0.0161663	1	1	1	0.0188457	1.02326e-07	0.0230654	1	1	0.1023	1	1	0.902668	1	1.5055e-10	0.63009	1	0.76756	1	0.581285	0.898108	1	1	0.765106	1	0.028221	1
Gemella	0.451288	1	0.0580989	1	0.320554	1	0.161745	0.890928	1	1	1	0.110065	0.609586	0.133904	1	1	1	NA	1	1	1	1	1	1	1	0.702475	0.167471	1	1	1	1	1	1	1	1	0.835381	1	1	1	1	1	1	1	0.282846	1
c_Uncultured_rumen_bacterium_Candidate_division_sr1	1	0.0986272	0.0185715	0.000381319	1	1	1	0.540479	1	1	0.000562322	1	1	1	0.27018	1	0.0181871	1	NA	0.194145	1	1	0.0583124	0.000304612	0.00153252	1	1	1.85245e-07	1	1	1	1	1.70555e-06	0.100197	1	1	1	0.0132568	1	1	1	1	1	0.0108381	1
Atopobium	1	0.00889327	0.570685	1	1	1	1	0.579977	1	1	1	1	1	1	1	1	1	1	0.0832048	NA	1	0.0236147	1	1	1	1	1	0.437612	1	0.18688	1	1	1	0.00731981	1	1	1	1	0.168647	1	1	1	1	0.721122	1
Leptotrichia	1	0.432241	1	0.513026	1	1	0.782889	1	1	1	1	0.883724	1	1	1	1	1	1	1	1	NA	1	1	1	1	1	1	1	1	1	1	1	1	1	1	1	1	1	1	1	1	1	1	1	1
Megasphaera	1	0.19658	1	1	1	1	0.32009	0.0707151	1	1	1	1	1	1	1	1	1	1	1	0.0236147	1	NA	1	1	1	0.702475	1	1	1	1	1	1	1	3.62004e-05	1	1	1	1	0.898108	1	1	1	1	0.598357	1
c_Tm7_phylum_sp._oral_clone_fr058_Candidate_division_tm7	1	0.660902	1	4.69191e-05	0.320554	1	0.848123	1	0.105619	1	0.00175593	1	1	1	0.284249	1	0.0134612	1	0.042409	1	1	1	NA	0.104906	0.00217396	1	1	0.0161377	1	0.538666	1	1	0.00411923	1	1	1	1	1	1	1	1	1	1	0.305372	1
c_Betaproteobacteria_Unclassified_1	1	1	0.000507687	0.000381319	1	1	0.370371	1	0.174134	1	0.00025739	1	1	0.535081	0.0836885	1	1.02326e-07	1	0.000454301	1	1	1	0.163187	NA	0.00224507	1	1	0.0658456	1	0.903352	1	1	5.44655e-10	0.0962656	1	0.307474	1	0.104772	0.898108	1	1	1	1	0.5332	1
p_Candidate_division_tm7_Uncultured_bacterium_Candidate_division_tm7	1	0.0487256	0.0580989	1.73061e-05	1	1	1	1	1	1	0.00377934	1	1	1	0.0627564	1	0.0207588	1	0.000562322	1	1	1	0.00434792	0.00160362	NA	1	1	0.00499418	1	1	1	1	0.000931216	0.163376	1	1	1	0.564607	1	1	0.867941	1	1	0.049682	1
Bergeyella	1	1	1	1	0.0784913	1	0.370371	0.948185	1	1	1	0.0115649	0.329333	1	0.13046	0.832012	1	0.702475	1	1	1	0.921313	1	1	1	NA	1	1	1	1	1	1	1	1	1	0.863096	1	1	1	0.231121	1	1	1	1	1
Catonella	1	1	1	1	1	1	1	1	1	0.0172748	1	1	1	1	1	0.135608	1	0.111647	1	1	1	1	1	1	1	1	NA	1	1	1	0.420383	1	1	1	1	1	1	0.127887	1	1	1	1	1	1	1
p_Candidate_division_sr1_Unclassified	1	0.00889327	0.114855	0.0124455	1	1	1	0.532159	1	1	0.000123304	1	1	1	0.0836885	1	0.094993	1	1.85245e-07	0.984627	1	1	0.021517	0.0658456	0.00422479	1	1	NA	1	1	1	0.167457	0.000125597	0.816617	1	1	1	0.564607	1	1	0.69928	1	1	0.0108381	0.390044
Pelomonas	1	1	1	1	1	1	1	1	1	1	1	1	1	1	1	1	1	1	1	1	1	1	1	1	1	1	1	1	NA	1	0.254997	1	1	1	1	1	1	1	1	1.07748e-06	1	1	1	1	1
Solobacterium	1	1	1	0.0677968	1	1	1	1	0.103283	1	0.000289085	1	1	1	1	1	1	1	1	0.112128	1	1	0.32677	0.478245	0.615671	1	1	1	1	NA	1	1	0.214641	1	1	1	1	0.564607	0.540269	1	1	1	1	1	1
c_Bacilli_Unclassified_1	1	1	0.132487	0.045674	1	1	0.782889	1	1	1	1	1	1	0.185778	1	1	0.406899	1	0.668092	1	1	1	1	1	1	1	0.588536	1	0.509995	1	NA	0.831876	1	1	1	1	1	0.795987	1	0.00819726	1	1	1	0.139212	1
Treponema	1	1	1	1	0.320554	1	1	1	1	1	1	1	1	1	1	0.0373351	1	1	0.668092	1	1	1	1	0.593042	1	1	1	0.0658456	1	1	0.831876	NA	0.438795	1	1	1	1	0.506211	0.304735	1	0.108596	1	1	1	0.00145518
k_Bacteria_Unclassified	1	0.713963	0.000152496	0.000381319	1	1	0.737292	1	0.542021	1	3.07503e-05	1	1	0.535081	0.234275	1	1.5055e-10	1	2.55833e-06	1	1	1	0.00926826	1.08931e-09	0.00217396	1	1	0.000251193	1	0.500828	1	0.926344	NA	0.415961	1	1	1	0.135656	0.898108	1	0.576798	1	1	0.139212	0.877801
c_Clostridia_Unclassified_2	1	0.0389126	0.534447	0.176106	1	1	1	0.0932501	1	1	1	1	1	0.80386	1	1	0.385055	1	0.0500984	0.00731981	1	3.62004e-05	1	0.0481328	0.100539	1	1	0.715414	1	1	1	1	0.244683	NA	1	1	1	0.739286	1	1	1	1	1	0.0982682	1
Uncultured_bacterium_oral_clone_bs003__Candidate_division_tm7	1	1	1	1	1	1	1	1	1	1	1	1	1	1	1	1	1	1	1	1	1	1	1	1	1	1	1	1	1	1	1	1	1	1	NA	1	0.00354909	1	1	1	0.69928	1	1	0.25486	1
Kingella	1	0.218773	0.889097	0.49922	1	1	1	1	1	1	0.705588	1	1	0.535081	1	1	0.248459	0.584767	0.764993	1	1	1	1	0.0768685	1	0.702475	1	1	1	1	1	1	1	1	1	NA	1	1	1	1	1	0.229447	1	0.049682	1
c_Candidate_division_tm7_single.cell_isolate_tm7a_Candidate_division_tm7	1	1	1	1	1	1	1	1	1	1	1	1	1	1	1	1	1	1	1	1	1	1	1	1	0.414923	1	0.986181	1	1	1	1	1	1	1	0.00354909	1	NA	1	1	0.703351	0.740265	1	1	1	1
c_Clostridia_Incertae_sedis	1	1	1	0.045674	1	1	1	1	1	1	0.00121132	1	1	1	1	1	0.406899	1	0.00331419	1	1	1	1	0.0392896	0.458744	1	0.167471	0.418394	1	0.755569	1	0.578527	0.0949595	0.788571	1	1	1	NA	0.304735	1	1	1	1	0.338166	1
Mogibacterium	1	1	1	0.30396	0.320554	1	1	1	0.174134	1	1	1	1	1	1	1	0.465707	1	1	0.0421617	1	0.921313	1	0.577137	1	1	1	1	1	0.500828	1	0.240913	0.527712	1	1	1	1	0.135656	NA	1	1	1	1	1	1
Ralstonia	1	1	1	1	1	1	1	1	1	1	0.969496	1	1	1	1	1	1	1	1	1	1	1	1	1	1	0.1976	1	1	1.07748e-06	1	0.0163945	1	1	1	1	1	1	1	1	NA	1	0.765106	1	1	1
Dialister	1	1	1	1	0.506001	1	1	1	1	1	1	1	1	1	0.899925	1	1	1	0.711134	1	1	1	0.720359	0.724567	0.458744	1	1	0.22957	1	1	1	0.0361986	0.14616	1	1	1	1	1	1	1	NA	1	1	1	0.390044
Propionibacterium	1	1	1	1	1	1	1	0.757088	1	1	1	1	1	0.133904	0.799612	1	0.239096	1	1	1	1	1	1	1	1	1	1	1	1	1	1	1	1	0.740768	1	0.205738	1	1	1	0.584341	1	NA	1	0.25486	1
c_Betaproteobacteria_Unclassified_2	1	1	1	1	0.0784913	1	1	1	1	1	1	0.156583	1	1	0.899925	1	1	1	1	1	1	1	1	1	1	0.602701	1	1	1	1	1	1	1	1	1	1	1	0.564607	1	1	1	1	NA	1	1
Rf9	1	0.0272015	0.00464492	0.0179588	1	1	1	0.890928	1	1	0.0131601	1	1	1	0.143425	1	0.0207588	0.502838	0.00174895	1	1	1	0.399332	0.562822	0.0406489	1	1	0.00499418	1	1	0.331218	1	0.14616	0.140383	1	0.205738	1	0.564607	1	1	1	0.765106	1	NA	1
Mycoplasma	1	1	1	1	1	1	1	1	1	1	1	1	1	1	1	1	1	1	1	1	1	1	1	1	1	1	1	0.0720312	1	1	1	0.00145518	0.220786	1	1	1	1	1	1	1	0.576798	1	1	1	NA

## Sheet: Supplementary_Table_2j (SubP)
Correlation Weight (r)	Streptococcus	Actinomyces	Capnocytophaga	Neisseria	Prevotella	Rothia	Fusobacterium	Veillonella	Derxia	Porphyromonas	Leptotrichia	Selenomonas	Kingella	Bergeyella	Treponema	c_Betaproteobacteria_Unclassified_2	Uncultured_bacterium_oral_clone_bs003__Candidate_division_tm7	Gemella	Haemophilus	c_Actinobacteria_Unclassified_1	k_Bacteria_Unclassified	Paludibacter	c_Bacilli_Unclassified_1	Granulicatella	p_Candidate_division_tm7_Unclassified	Campylobacter	Wchb1-69	Ottowia	c_Betaproteobacteria_Unclassified_1	p_Candidate_division_tm7_Uncultured_bacterium_Candidate_division_tm7	Corynebacterium	c_Clostridia_Unclassified_1	Catonella	Tannerella	Lactobacillus	c_Clostridia_Incertae_sedis	c_Candidate_division_tm7_single-cell_isolate_tm7a_Candidate_division_tm7	Aggregatibacter	Cardiobacterium	Dialister	c_Actinobacteria_Unclassified_2	Johnsonella	Atopobium	c_Clostridia_Unclassified_2	Parvimonas
Streptococcus	1	0.242062	-0.395431	-0.00126598	-0.472566	0.407759	-0.456997	0.132195	0.111481	-0.351484	-0.584454	-0.47056	0.152593	0.0793738	-0.438352	-0.267911	-0.22265	0.289872	0.322717	-0.350525	0.44607	-0.383033	0.158556	0.385922	-0.407395	-0.286347	-0.290535	-0.44347	0.4019	-0.362683	0.0347348	-0.198857	-0.353016	-0.553598	0.0558056	-0.245946	-0.230188	-0.122231	-0.389864	-0.244162	-0.296375	-0.382075	0.0101826	-0.219644	-0.309989
Actinomyces	0.242062	1	-0.153478	-0.100139	-0.453787	0.541135	-0.390451	0.17551	0.0152243	-0.542867	-0.483936	-0.411853	0.321094	-0.0782154	-0.32517	-0.0137936	0.0582087	-0.12144	-0.0440096	0.112569	0.36207	-0.267148	-0.146663	-0.0655078	-0.412446	-0.393706	-0.188857	-0.110221	0.31814	-0.383771	0.442636	-0.361436	-0.238204	-0.359226	0.0039455	-0.182298	-0.297838	-0.267877	0.0720199	-0.234308	-0.125519	-0.329782	-0.0528586	-0.211305	-0.133226
Capnocytophaga	-0.395431	-0.153478	1	0.501954	-0.0755672	-0.0878399	0.0207572	0.0423443	0.132551	0.36328	0.39565	0.150346	0.229833	0.434778	-0.0889347	0.605152	-0.0332493	-0.126509	-0.0239349	0.306635	-0.130017	0.0497153	0.285703	0.161714	-0.144717	-0.00304655	0.00368539	0.254357	-0.174475	0.158709	0.0307265	-0.129616	0.0626113	0.11116	-0.0893013	0.174775	0.24791	0.127115	0.352874	-0.107137	0.275795	0.0265028	-0.307936	-0.0506682	-0.0201571
Neisseria	-0.00126598	-0.100139	0.501954	1	-0.399218	0.232131	-0.390827	-0.145781	0.428664	0.17959	-0.0428391	-0.366303	0.0297144	0.63478	-0.336023	0.530588	-0.17798	0.199833	0.350031	0.0423364	0.241874	-0.123591	0.526791	0.52969	-0.361093	-0.319633	-0.101707	0.166043	0.175033	-0.0445921	-0.0557858	-0.266758	-0.127456	-0.268655	-0.134549	0.133571	0.0256497	0.292042	0.206353	-0.430449	-0.0686791	-0.0259292	-0.272874	-0.241434	-0.145208
Prevotella	-0.472566	-0.453787	-0.0755672	-0.399218	1	-0.60818	0.74359	-0.0425584	-0.292969	0.455725	0.568515	0.790281	-0.167785	-0.294934	0.733939	-0.0850908	0.15233	-0.0688023	-0.228693	0.145337	-0.49097	0.476503	-0.238992	-0.433427	0.80858	0.555898	0.355813	0.193024	-0.416704	0.497358	-0.124369	0.577076	0.518225	0.593968	0.0975335	0.436036	0.262209	0.175857	0.248544	0.626117	0.332609	0.464845	0.340203	0.383147	0.44023
Rothia	0.407759	0.541135	-0.0878399	0.232131	-0.60818	1	-0.45414	-0.160792	0.286011	-0.526408	-0.607086	-0.600953	0.165426	0.219328	-0.306542	0.0633633	-0.18714	0.100761	0.208006	-0.0387144	0.804572	-0.263164	0.0209796	0.282866	-0.445532	-0.596763	-0.257369	-0.176219	0.729234	-0.385636	0.179689	-0.352958	-0.314144	-0.474364	-0.10421	-0.23465	-0.308012	-0.0816553	-0.0787976	-0.385966	-0.259444	-0.421585	-0.207334	-0.16427	-0.108007
Fusobacterium	-0.456997	-0.390451	0.0207572	-0.390827	0.74359	-0.45414	1	-0.225236	-0.2949	0.443925	0.401319	0.610656	-0.210811	-0.0955626	0.721526	0.00180902	0.221268	-0.0469228	-0.180794	0.194522	-0.433576	0.48222	-0.281667	-0.4157	0.676228	0.357558	0.287801	0.137914	-0.356625	0.432414	-0.140251	0.548816	0.509638	0.577601	0.110137	0.344819	0.222285	0.207575	0.287136	0.494851	0.382474	0.354121	0.0202829	0.300605	0.593887
Veillonella	0.132195	0.17551	0.0423443	-0.145781	-0.0425584	-0.160792	-0.225236	1	-0.1899	-0.1331	0.00969183	0.0626045	0.479068	-0.208024	-0.35125	-0.211556	-0.00195526	-0.213465	-0.0303659	-0.0655137	-0.0624261	-0.293836	-0.0360088	0.175119	-0.127348	0.198581	-0.103057	-0.174948	-0.0575402	0.0327983	0.0493591	-0.158198	-0.163176	-0.276512	0.160992	-0.164468	-0.176696	-0.311566	-0.160037	0.0545717	0.0244239	-0.127513	0.194509	-0.112816	-0.165214
Derxia	0.111481	0.0152243	0.132551	0.428664	-0.292969	0.286011	-0.2949	-0.1899	1	0.105282	-0.109712	-0.252143	0.0120826	0.391092	-0.115174	0.359262	-0.183275	-0.0167976	0.472206	0.0950762	0.270793	-0.0725136	0.45182	0.300007	-0.280842	-0.307113	-0.139639	0.049406	0.138957	0.07185	0.16926	-0.331098	-0.117809	-0.0476327	-0.00430517	0.135922	0.0095169	0.149216	0.127317	-0.321467	-0.11494	-0.0218582	-0.219299	-0.196359	-0.204886
Porphyromonas	-0.351484	-0.542867	0.36328	0.17959	0.455725	-0.526408	0.443925	-0.1331	0.105282	1	0.506799	0.459723	-0.0866283	0.199192	0.351713	0.284272	0.0770549	0.128222	0.0589497	0.229423	-0.446666	0.368826	0.17433	-0.0552739	0.360732	0.307083	0.177251	0.279562	-0.443593	0.419918	-0.0450215	0.293251	0.428005	0.495663	0.0966441	0.466038	0.371205	0.44475	0.272413	0.079009	0.295936	0.465688	-0.133224	0.0577126	0.209825
Leptotrichia	-0.584454	-0.483936	0.39565	-0.0428391	0.568515	-0.607086	0.401319	0.00969183	-0.109712	0.506799	1	0.761098	-0.0930453	-0.000304525	0.422931	0.0930371	0.213158	-0.189008	-0.253538	0.406244	-0.443539	0.265668	-0.012672	-0.23733	0.490494	0.53889	0.193377	0.17997	-0.472057	0.483492	0.0170012	0.240826	0.206741	0.642514	0.0787443	0.192689	0.516676	0.195813	0.164975	0.42258	0.504152	0.306965	0.104093	0.267524	0.0617061
Selenomonas	-0.47056	-0.411853	0.150346	-0.366303	0.790281	-0.600953	0.610656	0.0626045	-0.252143	0.459723	0.761098	1	-0.0818754	-0.222777	0.628929	-0.0935348	0.262602	-0.227523	-0.380388	0.285888	-0.465589	0.315238	-0.190202	-0.394404	0.732053	0.627654	0.285595	0.164679	-0.467183	0.48004	-0.0944282	0.456293	0.359607	0.717502	-0.0257932	0.218666	0.426243	0.0404992	0.157179	0.640214	0.448722	0.294026	0.300543	0.344896	0.232603
Kingella	0.152593	0.321094	0.229833	0.0297144	-0.167785	0.165426	-0.210811	0.479068	0.0120826	-0.0866283	-0.0930453	-0.0818754	1	0.0898978	-0.316661	0.0924077	-0.133358	-0.256733	-0.0444663	-0.0232848	0.140144	-0.193635	-0.0626076	0.249048	-0.226011	-0.0474613	-0.173347	-0.0104486	0.0995133	-0.130752	0.174172	-0.330473	0.00799106	-0.243964	0.00443535	0.0739337	-0.071168	-0.116803	0.0923291	-0.103064	0.0349169	-0.11255	-0.0664767	-0.0841599	-0.148437
Bergeyella	0.0793738	-0.0782154	0.434778	0.63478	-0.294934	0.219328	-0.0955626	-0.208024	0.391092	0.199192	-0.000304525	-0.222777	0.0898978	1	-0.156195	0.427758	-0.0921535	0.107358	0.250255	0.149259	0.170229	0.0619166	0.348166	0.363162	-0.205019	-0.247677	-0.142483	0.0863155	0.112494	-0.00442731	0.0446737	-0.236831	-0.0514381	-0.100949	-0.0877167	0.134977	0.0815987	0.325247	0.128916	-0.352594	0.127718	-0.174366	-0.211131	-0.111153	-0.121941
Treponema	-0.438352	-0.32517	-0.0889347	-0.336023	0.733939	-0.306542	0.721526	-0.35125	-0.115174	0.351713	0.422931	0.628929	-0.316661	-0.156195	1	-0.0104706	0.206566	-0.0580925	-0.211423	0.17918	-0.278029	0.618102	-0.267003	-0.443566	0.725466	0.369945	0.483393	0.0634703	-0.212253	0.402951	-0.0530522	0.592603	0.556321	0.673699	-0.04135	0.362793	0.25347	0.222411	0.198157	0.531546	0.290129	0.423294	0.175783	0.488305	0.500355
c_Betaproteobacteria_Unclassified_2	-0.267911	-0.0137936	0.605152	0.530588	-0.0850908	0.0633633	0.00180902	-0.211556	0.359262	0.284272	0.0930371	-0.0935348	0.0924077	0.427758	-0.0104706	1	-0.000555429	0.114228	0.126366	0.245903	-0.00763992	0.170297	0.317904	0.16761	-0.0737157	-0.222962	0.00469687	0.244151	-0.038188	0.106317	0.0672507	-0.16345	0.115452	0.00951081	0.0330407	0.254164	0.106726	0.116584	0.371022	-0.232811	0.120328	0.0926578	-0.225184	-0.0595324	0.20932
Uncultured_bacterium_oral_clone_bs003__Candidate_division_tm7	-0.22265	0.0582087	-0.0332493	-0.17798	0.15233	-0.18714	0.221268	-0.00195526	-0.183275	0.0770549	0.213158	0.262602	-0.133358	-0.0921535	0.206566	-0.000555429	1	0.0436969	-0.297583	0.25481	-0.217867	0.157385	0.0390644	-0.202435	0.270487	0.1795	0.204281	-0.00813144	-0.321294	0.105214	0.2267	0.0317106	0.108979	0.292746	0.271015	-0.00512412	0.38102	-0.0358447	-0.066711	0.340464	0.141428	0.0525563	0.0239037	0.256478	0.187971
Gemella	0.289872	-0.12144	-0.126509	0.199833	-0.0688023	0.100761	-0.0469228	-0.213465	-0.0167976	0.128222	-0.189008	-0.227523	-0.256733	0.107358	-0.0580925	0.114228	0.0436969	1	0.35212	-0.1661	0.146556	0.0191587	0.19671	0.135929	-0.0593115	0.00443842	-0.0607704	-0.110137	0.223877	-0.021662	-0.00955163	0.182531	0.0246471	-0.210487	0.123716	0.0211392	-0.0505793	0.141466	-0.0734444	-0.098945	-0.178013	-0.0404774	0.0143517	0.0140569	0.188742
Haemophilus	0.322717	-0.0440096	-0.0239349	0.350031	-0.228693	0.208006	-0.180794	-0.0303659	0.472206	0.0589497	-0.253538	-0.380388	-0.0444663	0.250255	-0.211423	0.126366	-0.297583	0.35212	1	-0.150964	0.162106	-0.120245	0.254386	0.345433	-0.302934	-0.18062	-0.13301	-0.044258	0.230242	0.11385	-0.110777	-0.132236	-0.00832308	-0.254903	0.0115282	0.109427	-0.167028	0.283425	0.257859	-0.463545	-0.120646	-0.0269973	-0.139955	-0.136215	-0.155026
c_Actinobacteria_Unclassified_1	-0.350525	0.112569	0.306635	0.0423364	0.145337	-0.0387144	0.194522	-0.0655137	0.0950762	0.229423	0.406244	0.285888	-0.0232848	0.149259	0.17918	0.245903	0.25481	-0.1661	-0.150964	1	-0.0979486	0.0969502	-0.0524431	-0.122717	0.131921	0.0439017	0.00798619	-0.00535034	-0.184329	0.249935	0.510473	-0.116991	0.0611151	0.356227	0.0627073	0.0835443	0.337835	0.138023	0.24896	0.120841	0.693498	0.0775233	-0.0432846	-0.00941243	0.112748
k_Bacteria_Unclassified	0.44607	0.36207	-0.130017	0.241874	-0.49097	0.804572	-0.433576	-0.0624261	0.270793	-0.446666	-0.443539	-0.465589	0.140144	0.170229	-0.278029	-0.00763992	-0.217867	0.146556	0.162106	-0.0979486	1	-0.358622	0.0103851	0.312864	-0.322841	-0.464502	-0.292686	-0.248612	0.778956	-0.329838	0.0839897	-0.223611	-0.323669	-0.468689	-0.0745519	-0.225443	-0.236596	-0.085337	-0.16025	-0.216416	-0.240131	-0.367079	-0.0417431	-0.0985555	-0.146314
Paludibacter	-0.383033	-0.267148	0.0497153	-0.123591	0.476503	-0.263164	0.48222	-0.293836	-0.0725136	0.368826	0.265668	0.315238	-0.193635	0.0619166	0.618102	0.170297	0.157385	0.0191587	-0.120245	0.0969502	-0.358622	1	-0.0815348	-0.19975	0.530614	0.0902579	0.475471	0.119749	-0.276611	0.352788	-0.0997653	0.355474	0.562952	0.56601	-0.0563847	0.479809	0.109076	0.253996	0.234062	0.236899	0.139086	0.43578	0.092388	0.226716	0.378496
c_Bacilli_Unclassified_1	0.158556	-0.146663	0.285703	0.526791	-0.238992	0.0209796	-0.281667	-0.0360088	0.45182	0.17433	-0.012672	-0.190202	-0.0626076	0.348166	-0.267003	0.317904	0.0390644	0.19671	0.254386	-0.0524431	0.0103851	-0.0815348	1	0.380367	-0.209604	-0.196689	-0.0448629	0.0176304	-0.0357331	0.0282729	-0.00713313	-0.326529	-0.0572139	-0.186097	0.152342	0.161691	-0.0242501	0.112266	-0.0901323	-0.177602	-0.118636	-0.00522068	-0.097646	-0.211739	-0.212553
Granulicatella	0.385922	-0.0655078	0.161714	0.52969	-0.433427	0.282866	-0.4157	0.175119	0.300007	-0.0552739	-0.23733	-0.394404	0.249048	0.363162	-0.443566	0.16761	-0.202435	0.135929	0.345433	-0.122717	0.312864	-0.19975	0.380367	1	-0.378503	-0.22319	-0.177002	-0.0840085	0.225989	-0.0807504	-0.148411	-0.276692	-0.193452	-0.339587	-0.133457	0.0561306	-0.124989	0.111418	-0.207846	-0.366544	-0.127473	-0.212166	-0.0603681	-0.362344	-0.229186
p_Candidate_division_tm7_Unclassified	-0.407395	-0.412446	-0.144717	-0.361093	0.80858	-0.445532	0.676228	-0.127348	-0.280842	0.360732	0.490494	0.732053	-0.226011	-0.205019	0.725466	-0.0737157	0.270487	-0.0593115	-0.302934	0.131921	-0.322841	0.530614	-0.209604	-0.378503	1	0.419745	0.249641	0.0287709	-0.348282	0.416748	-0.219088	0.509391	0.456855	0.624422	0.116554	0.306908	0.24279	0.108781	0.142268	0.552362	0.260214	0.391769	0.347538	0.436004	0.409669
Campylobacter	-0.286347	-0.393706	-0.00304655	-0.319633	0.555898	-0.596763	0.357558	0.198581	-0.307113	0.307083	0.53889	0.627654	-0.0474613	-0.247677	0.369945	-0.222962	0.1795	0.00443842	-0.18062	0.0439017	-0.464502	0.0902579	-0.196689	-0.22319	0.419745	1	0.208655	0.173975	-0.415843	0.277903	-0.201345	0.408405	0.278631	0.37952	0.135062	0.105112	0.328275	0.0423115	-0.0593836	0.439538	0.306309	0.125936	0.296886	0.239284	0.0938555
Wchb1-69	-0.290535	-0.188857	0.00368539	-0.101707	0.355813	-0.257369	0.287801	-0.103057	-0.139639	0.177251	0.193377	0.285595	-0.173347	-0.142483	0.483393	0.00469687	0.204281	-0.0607704	-0.13301	0.00798619	-0.292686	0.475471	-0.0448629	-0.177002	0.249641	0.208655	1	0.0289335	-0.176189	0.17967	-0.0277529	0.399822	0.304445	0.420521	-0.102616	0.196967	0.171536	0.160874	0.024994	0.320849	0.117027	0.339122	0.0334607	0.0278051	0.179873
Ottowia	-0.44347	-0.110221	0.254357	0.166043	0.193024	-0.176219	0.137914	-0.174948	0.049406	0.279562	0.17997	0.164679	-0.0104486	0.0863155	0.0634703	0.244151	-0.00813144	-0.110137	-0.044258	-0.00535034	-0.248612	0.119749	0.0176304	-0.0840085	0.0287709	0.173975	0.0289335	1	-0.227386	0.146144	-0.0801535	0.0492897	0.189225	0.168655	-0.128351	0.271951	0.172493	0.269258	0.323378	-0.0798046	-0.000283835	0.323997	-0.0404075	0.067157	-0.00019771
c_Betaproteobacteria_Unclassified_1	0.4019	0.31814	-0.174475	0.175033	-0.416704	0.729234	-0.356625	-0.0575402	0.138957	-0.443593	-0.472057	-0.467183	0.0995133	0.112494	-0.212253	-0.038188	-0.321294	0.223877	0.230242	-0.184329	0.778956	-0.276611	-0.0357331	0.225989	-0.348282	-0.415843	-0.176189	-0.227386	1	-0.355156	0.131146	-0.189119	-0.238398	-0.404088	-0.159796	-0.219319	-0.261003	-0.0756402	-0.124196	-0.256583	-0.206511	-0.272273	-0.0430982	-0.0838282	-0.109216
p_Candidate_division_tm7_Uncultured_bacterium_Candidate_division_tm7	-0.362683	-0.383771	0.158709	-0.0445921	0.497358	-0.385636	0.432414	0.0327983	0.07185	0.419918	0.483492	0.48004	-0.130752	-0.00442731	0.402951	0.106317	0.105214	-0.021662	0.11385	0.249935	-0.329838	0.352788	0.0282729	-0.0807504	0.416748	0.277903	0.17967	0.146144	-0.355156	1	-0.0719628	0.315741	0.43381	0.443162	0.12001	0.279445	0.33185	0.310709	0.24292	0.247391	0.170242	0.219743	0.222484	0.243421	0.192122
Corynebacterium	0.0347348	0.442636	0.0307265	-0.0557858	-0.124369	0.179689	-0.140251	0.0493591	0.16926	-0.0450215	0.0170012	-0.0944282	0.174172	0.0446737	-0.0530522	0.0672507	0.2267	-0.00955163	-0.110777	0.510473	0.0839897	-0.0997653	-0.00713313	-0.148411	-0.219088	-0.201345	-0.0277529	-0.0801535	0.131146	-0.0719628	1	-0.321287	-0.137866	0.0456877	0.157629	0.0579921	0.193121	0.011902	0.0141011	-0.0836623	0.221733	0.0469296	-0.144292	0.0129841	-0.0682832
c_Clostridia_Unclassified_1	-0.198857	-0.361436	-0.129616	-0.266758	0.577076	-0.352958	0.548816	-0.158198	-0.331098	0.293251	0.240826	0.456293	-0.330473	-0.236831	0.592603	-0.16345	0.0317106	0.182531	-0.132236	-0.116991	-0.223611	0.355474	-0.326529	-0.276692	0.509391	0.408405	0.399822	0.0492897	-0.189119	0.315741	-0.321287	1	0.420649	0.321117	-0.08226	0.140914	0.0733803	0.140924	0.0748123	0.436452	0.0875433	0.299393	0.11102	0.135367	0.323231
Catonella	-0.353016	-0.238204	0.0626113	-0.127456	0.518225	-0.314144	0.509638	-0.163176	-0.117809	0.428005	0.206741	0.359607	0.00799106	-0.0514381	0.556321	0.115452	0.108979	0.0246471	-0.00832308	0.0611151	-0.323669	0.562952	-0.0572139	-0.193452	0.456855	0.278631	0.304445	0.189225	-0.238398	0.43381	-0.137866	0.420649	1	0.391497	0.0898807	0.642543	0.0923608	0.256607	0.285847	0.220744	0.102479	0.393149	0.137309	0.311955	0.423274
Tannerella	-0.553598	-0.359226	0.11116	-0.268655	0.593968	-0.474364	0.577601	-0.276512	-0.0476327	0.495663	0.642514	0.717502	-0.243964	-0.100949	0.673699	0.00951081	0.292746	-0.210487	-0.254903	0.356227	-0.468689	0.56601	-0.186097	-0.339587	0.624422	0.37952	0.420521	0.168655	-0.404088	0.443162	0.0456877	0.321117	0.391497	1	-0.0291432	0.263023	0.461545	0.2328	0.255625	0.437188	0.412872	0.387317	0.0903032	0.238661	0.23418
Lactobacillus	0.0558056	0.0039455	-0.0893013	-0.134549	0.0975335	-0.10421	0.110137	0.160992	-0.00430517	0.0966441	0.0787443	-0.0257932	0.00443535	-0.0877167	-0.04135	0.0330407	0.271015	0.123716	0.0115282	0.0627073	-0.0745519	-0.0563847	0.152342	-0.133457	0.116554	0.135062	-0.102616	-0.128351	-0.159796	0.12001	0.157629	-0.08226	0.0898807	-0.0291432	1	0.0993693	0.0446832	-0.0537076	0.00551239	-0.073138	0.11199	0.0520286	0.00812991	0.0184646	0.279423
c_Clostridia_Incertae_sedis	-0.245946	-0.182298	0.174775	0.133571	0.436036	-0.23465	0.344819	-0.164468	0.135922	0.466038	0.192689	0.218666	0.0739337	0.134977	0.362793	0.254164	-0.00512412	0.0211392	0.109427	0.0835443	-0.225443	0.479809	0.161691	0.0561306	0.306908	0.105112	0.196967	0.271951	-0.219319	0.279445	0.0579921	0.140914	0.642543	0.263023	0.0993693	1	0.0242726	0.371975	0.362549	-0.0117334	0.0723666	0.504348	-0.0410034	0.122747	0.308963
c_Candidate_division_tm7_single-cell_isolate_tm7a_Candidate_division_tm7	-0.230188	-0.297838	0.24791	0.0256497	0.262209	-0.308012	0.222285	-0.176696	0.0095169	0.371205	0.516676	0.426243	-0.071168	0.0815987	0.25347	0.106726	0.38102	-0.0505793	-0.167028	0.337835	-0.236596	0.109076	-0.0242501	-0.124989	0.24279	0.328275	0.171536	0.172493	-0.261003	0.33185	0.193121	0.0733803	0.0923608	0.461545	0.0446832	0.0242726	1	0.375449	0.0290756	0.263123	0.352769	0.231763	-0.0476169	0.317058	0.0147763
Aggregatibacter	-0.122231	-0.267877	0.127115	0.292042	0.175857	-0.0816553	0.207575	-0.311566	0.149216	0.44475	0.195813	0.0404992	-0.116803	0.325247	0.222411	0.116584	-0.0358447	0.141466	0.283425	0.138023	-0.085337	0.253996	0.112266	0.111418	0.108781	0.0423115	0.160874	0.269258	-0.0756402	0.310709	0.011902	0.140924	0.256607	0.2328	-0.0537076	0.371975	0.375449	1	0.266305	-0.0720771	0.174957	0.306308	-0.109221	0.116673	0.0507441
Cardiobacterium	-0.389864	0.0720199	0.352874	0.206353	0.248544	-0.0787976	0.287136	-0.160037	0.127317	0.272413	0.164975	0.157179	0.0923291	0.128916	0.198157	0.371022	-0.066711	-0.0734444	0.257859	0.24896	-0.16025	0.234062	-0.0901323	-0.207846	0.142268	-0.0593836	0.024994	0.323378	-0.124196	0.24292	0.0141011	0.0748123	0.285847	0.255625	0.00551239	0.362549	0.0290756	0.266305	1	0.0230984	0.28654	0.200836	-0.138517	0.0624128	0.251708
Dialister	-0.244162	-0.234308	-0.107137	-0.430449	0.626117	-0.385966	0.494851	0.0545717	-0.321467	0.079009	0.42258	0.640214	-0.103064	-0.352594	0.531546	-0.232811	0.340464	-0.098945	-0.463545	0.120841	-0.216416	0.236899	-0.177602	-0.366544	0.552362	0.439538	0.320849	-0.0798046	-0.256583	0.247391	-0.0836623	0.436452	0.220744	0.437188	-0.073138	-0.0117334	0.263123	-0.0720771	0.0230984	1	0.217323	0.123955	0.397307	0.322105	0.297009
c_Actinobacteria_Unclassified_2	-0.296375	-0.125519	0.275795	-0.0686791	0.332609	-0.259444	0.382474	0.0244239	-0.11494	0.295936	0.504152	0.448722	0.0349169	0.127718	0.290129	0.120328	0.141428	-0.178013	-0.120646	0.693498	-0.240131	0.139086	-0.118636	-0.127473	0.260214	0.306309	0.117027	-0.000283835	-0.206511	0.170242	0.221733	0.0875433	0.102479	0.412872	0.11199	0.0723666	0.352769	0.174957	0.28654	0.217323	1	0.083788	0.0206914	0.0159138	0.180083
Johnsonella	-0.382075	-0.329782	0.0265028	-0.0259292	0.464845	-0.421585	0.354121	-0.127513	-0.0218582	0.465688	0.306965	0.294026	-0.11255	-0.174366	0.423294	0.0926578	0.0525563	-0.0404774	-0.0269973	0.0775233	-0.367079	0.43578	-0.00522068	-0.212166	0.391769	0.125936	0.339122	0.323997	-0.272273	0.219743	0.0469296	0.299393	0.393149	0.387317	0.0520286	0.504348	0.231763	0.306308	0.200836	0.123955	0.083788	1	0.00986564	0.267991	0.123312
Atopobium	0.0101826	-0.0528586	-0.307936	-0.272874	0.340203	-0.207334	0.0202829	0.194509	-0.219299	-0.133224	0.104093	0.300543	-0.0664767	-0.211131	0.175783	-0.225184	0.0239037	0.0143517	-0.139955	-0.0432846	-0.0417431	0.092388	-0.097646	-0.0603681	0.347538	0.296886	0.0334607	-0.0404075	-0.0430982	0.222484	-0.144292	0.11102	0.137309	0.0903032	0.00812991	-0.0410034	-0.0476169	-0.109221	-0.138517	0.397307	0.0206914	0.00986564	1	0.272828	-0.00180493
c_Clostridia_Unclassified_2	-0.219644	-0.211305	-0.0506682	-0.241434	0.383147	-0.16427	0.300605	-0.112816	-0.196359	0.0577126	0.267524	0.344896	-0.0841599	-0.111153	0.488305	-0.0595324	0.256478	0.0140569	-0.136215	-0.00941243	-0.0985555	0.226716	-0.211739	-0.362344	0.436004	0.239284	0.0278051	0.067157	-0.0838282	0.243421	0.0129841	0.135367	0.311955	0.238661	0.0184646	0.122747	0.317058	0.116673	0.0624128	0.322105	0.0159138	0.267991	0.272828	1	0.313122
Parvimonas	-0.309989	-0.133226	-0.0201571	-0.145208	0.44023	-0.108007	0.593887	-0.165214	-0.204886	0.209825	0.0617061	0.232603	-0.148437	-0.121941	0.500355	0.20932	0.187971	0.188742	-0.155026	0.112748	-0.146314	0.378496	-0.212553	-0.229186	0.409669	0.0938555	0.179873	-0.00019771	-0.109216	0.192122	-0.0682832	0.323231	0.423274	0.23418	0.279423	0.308963	0.0147763	0.0507441	0.251708	0.297009	0.180083	0.123312	-0.00180493	0.313122	1
Benjamini-Hochberg-Yekutieli P-adjust	Streptococcus	Actinomyces	Capnocytophaga	Neisseria	Prevotella	Rothia	Fusobacterium	Veillonella	Derxia	Porphyromonas	Leptotrichia	Selenomonas	Kingella	Bergeyella	Treponema	c_Betaproteobacteria_Unclassified_2	Uncultured_bacterium_oral_clone_bs003__Candidate_division_tm7	Gemella	Haemophilus	c_Actinobacteria_Unclassified_1	k_Bacteria_Unclassified	Paludibacter	c_Bacilli_Unclassified_1	Granulicatella	p_Candidate_division_tm7_Unclassified	Campylobacter	Wchb1.69	Ottowia	c_Betaproteobacteria_Unclassified_1	p_Candidate_division_tm7_Uncultured_bacterium_Candidate_division_tm7	Corynebacterium	c_Clostridia_Unclassified_1	Catonella	Tannerella	Lactobacillus	c_Clostridia_Incertae_sedis	c_Candidate_division_tm7_single.cell_isolate_tm7a_Candidate_division_tm7	Aggregatibacter	Cardiobacterium	Dialister	c_Actinobacteria_Unclassified_2	Johnsonella	Atopobium	c_Clostridia_Unclassified_2	Parvimonas
Streptococcus	NA	0.289631	0.0119274	1	0.000140567	0.0028343	0.000402169	1	1	0.0143517	7.5e-07	0.000211317	1	1	0.000732892	0.408413	0.738735	0.919903	0.102341	0.0592674	0.000906592	0.00950118	1	0.0140163	0.00219905	0.101173	0.172054	0.00818416	0.00515873	0.0163615	1	0.562484	0.0194804	2.91e-06	1	0.347519	0.360899	1	0.0657489	0.241467	0.155782	0.00984184	1	0.498137	0.107693
Actinomyces	0.202741	NA	1	1	0.000285067	7.2e-06	0.00379279	1	1	4.54e-05	0.000102186	0.00173722	0.2148	1	0.0289062	1	1	1	1	1	0.0167111	0.172812	1	1	0.00203537	0.00636968	0.964975	1	0.058726	0.00840551	0.00424676	0.0204961	0.288738	0.0105278	1	0.902102	0.113658	0.283467	1	0.277528	1	0.0412004	1	0.538487	1
Capnocytophaga	0.00496973	1	NA	9.4e-05	1	1	1	1	1	0.0113136	0.00311249	0.941697	0.966228	0.00539959	1	6.69e-07	1	1	1	0.164534	1	1	0.286478	0.958873	1	1	1	0.644075	0.770098	1	1	1	1	1	1	0.98946	0.295061	1	0.0685064	1	0.205535	1	0.252882	1	1
Neisseria	1	1	0.000234916	NA	0.00224075	0.292578	0.00379279	1	0.00519581	0.726396	1	0.00824522	1	6.42e-08	0.0215584	4.73e-05	0.975275	1	0.0584058	1	0.27638	1	0.000117921	9.96e-05	0.00999873	0.0524152	1	1	0.770098	1	1	0.14623	1	0.118764	1	1	1	0.216768	0.689264	0.00144449	1	1	0.360494	0.36514	1
Prevotella	0.000581122	0.0012828	1	0.00644215	NA	1.45e-07	8.12e-13	1	0.153696	0.000586567	1.78e-06	0	1	0.17796	2.73e-12	1	1	1	0.482581	1	0.000279004	0.000228599	0.593035	0.00423698	0	6.72e-06	0.0496486	1	0.00379938	0.000486051	1	2.5e-06	4.81e-05	3.05e-07	1	0.00227043	0.242465	1	0.348846	6.54e-08	0.075448	0.00101953	0.138367	0.0315374	0.00314923
Rothia	0.00373838	2.52e-05	1	0.36224	8.87e-08	NA	0.000420724	1	0.170147	6.03e-05	1.93e-07	1.02e-07	1	0.716383	0.0461934	1	0.948979	1	0.666725	1	0	0.17515	1	0.138768	0.000678563	6.22e-07	0.326083	1	2.44e-12	0.00840551	1	0.0227714	0.0578534	0.000193098	1	0.423112	0.0922464	1	1	0.00655683	0.268689	0.00349848	0.987731	1	1
Fusobacterium	0.000884771	0.00800699	1	0.00789395	2.71e-13	0.000504869	NA	1	0.153696	0.000678299	0.00263859	5.51e-08	1	1	4.06e-12	1	0.738735	1	1	1	0.00126292	0.000228599	0.286478	0.00668767	3.84e-10	0.0180004	0.172054	1	0.0230734	0.002213	1	1.05e-05	6.2e-05	8.03e-07	1	0.0397245	0.409573	0.751667	0.256343	0.000136815	0.0193968	0.0219002	1	0.136729	1.53e-06
Veillonella	1	0.868145	1	1	1	0.862463	0.294762	NA	0.948716	1	1	1	0.00153057	0.791185	0.0137753	0.77096	1	1	1	1	1	0.0971083	1	0.813894	1	0.526516	1	1	1	1	1	1	1	0.100877	1	1	0.918052	0.166086	1	1	1	1	1	1	1
Derxia	1	1	1	0.00222678	0.0582985	0.102088	0.0616585	1	NA	1	1	0.1602	1	0.0175847	1	0.0441624	0.970556	1	0.00162678	1	0.15188	1	0.00280779	0.0926982	0.0867481	0.0645871	1	1	1	1	1	0.0403244	1	1	1	1	1	1	1	0.0398942	1	1	0.912327	0.693049	0.674297
Porphyromonas	0.0148169	2.52e-05	0.0320551	0.897253	0.000276031	1.51e-05	0.000616934	1	1	NA	4.52e-05	0.000278253	1	0.838238	0.0137753	0.305555	1	1	1	0.621075	0.000906592	0.0132072	1	1	0.00999873	0.0645871	0.964975	0.526359	0.00162792	0.00320361	1	0.0798879	0.0020037	7.28e-05	1	0.000722391	0.0242839	0.00772983	0.323853	1	0.155782	0.00101953	1	1	0.649229
Leptotrichia	3e-06	0.00039968	0.0119274	1	9.87e-07	1.45e-07	0.0027938	1	1	0.000120615	NA	4.27e-14	1	1	0.00124036	1	0.760332	1	0.332052	0.0130438	0.000906592	0.172812	1	0.356491	9.53e-05	1.44e-05	0.937663	1	0.000683863	0.000486051	1	0.260697	0.519776	1.11e-08	1	0.777278	0.00020981	0.894932	1	0.00183078	0.000208771	0.0683884	1	0.253784	1
Selenomonas	0.000581122	0.00446713	1	0.017315	0	1.83e-07	1.1e-07	1	0.3204	0.000556505	8.54e-14	NA	1	0.716383	2.08e-08	1	0.45091	1	0.0348965	0.256061	0.000518174	0.0560143	1	0.012405	1.71e-12	1.15e-07	0.172054	1	0.000683863	0.000486051	1	0.000914155	0.0167865	1.94e-11	1	0.508514	0.00575669	1	1	4.06e-08	0.0021551	0.0864349	0.252882	0.071326	0.501866
Kingella	0.958912	0.0470263	0.571565	1	0.745009	0.837492	0.362633	0.00153057	1	1	1	1	NA	1	0.0357999	1	1	1	1	1	1	0.622038	1	0.287281	0.271752	1	0.966755	1	1	1	1	0.0403244	1	0.1878	1	1	1	1	1	1	1	1	1	1	1
Bergeyella	1	1	0.00399646	6.42e-08	0.0572014	0.371458	1	1	0.0175847	0.520286	1	0.28248	1	NA	0.880105	0.00539959	1	1	0.335066	1	0.886662	1	0.0800961	0.0180587	0.38429	0.23218	1	1	1	1	1	0.273991	1	1	1	1	1	0.16582	1	0.0184398	1	0.919958	0.987731	1	1
Treponema	0.00128256	0.0443229	1	0.0364835	6.84e-13	0.0607808	6.09e-12	0.144641	1	0.0143517	0.00125866	1.65e-08	0.2148	1	NA	1	0.786554	1	0.656574	1	0.132701	2.48e-07	0.371412	0.00407463	2.53e-12	0.0126959	0.000914396	1	0.464764	0.00495079	1	1.68e-06	6.54e-06	9.81e-10	1	0.0246558	0.273899	0.587183	0.733103	2.23e-05	0.166091	0.00349848	1	0.000960026	0.000255837
c_Betaproteobacteria_Unclassified_2	0.121011	1	6.69e-07	2.95e-05	1	1	1	1	0.0441624	0.0891203	1	1	1	0.00539959	1	NA	1	1	1	0.463822	1	0.917248	0.137995	0.896693	1	0.357118	1	0.644075	1	1	1	0.962388	1	1	1	0.305299	1	1	0.0657489	0.277528	1	1	0.912327	1	0.649229
Uncultured_bacterium_oral_clone_bs003__Candidate_division_tm7	0.292095	1	1	0.897253	0.936946	0.632653	0.300817	1	1	1	0.438653	0.128607	1	1	0.395161	1	NA	1	0.165346	0.463822	0.380741	1	1	0.566319	0.109331	0.682105	0.853085	1	0.0575305	1	1	1	1	0.0680417	1	1	0.0242839	1	1	0.0257276	1	1	1	0.309392	0.812533
Gemella	0.0735923	1	1	0.647852	1	1	1	1	1	1	0.591282	0.262988	0.831684	1	1	1	1	NA	0.0584058	1	1	1	0.98994	1	1	1	1	1	0.395869	1	1	0.712426	1	0.344181	1	1	1	1	1	1	1	1	1	1	0.812533
Haemophilus	0.0341138	1	1	0.0251026	0.248602	0.442776	0.59231	1	0.00214584	1	0.202118	0.00523448	1	0.485467	0.369323	1	0.340209	0.28101	NA	1	0.982569	1	0.455525	0.0292029	0.0492363	0.682105	1	1	0.395463	1	1	1	1	0.149967	1	1	0.970375	0.243068	0.348846	0.00054226	1	1	1	1	1
c_Actinobacteria_Unclassified_1	0.0148169	1	0.127971	1	1	1	0.471797	1	1	0.299036	0.00230185	0.0737374	1	1	0.62724	0.526971	0.45091	1	1	NA	1	1	1	1	1	1	1	1	0.713986	0.241148	0.000296029	1	1	0.011127	1	1	0.0559704	1	0.348846	1	2.69e-10	1	1	1	1
k_Bacteria_Unclassified	0.00116917	0.0170064	1	0.308517	6.44e-05	0	0.000885201	1	0.216972	0.000678299	0.000582809	0.000227083	1	1	0.0933821	1	0.738735	1	1	1	NA	0.0173604	1	0.0686532	0.0297369	0.000621809	0.172054	0.644075	0	0.0359869	1	0.352192	0.0463976	0.000231311	1	0.489076	0.344306	1	1	0.355358	0.397296	0.0153194	1	1	1
Paludibacter	0.00615115	0.166526	1	1	0.000124148	0.167189	0.000130736	0.41271	1	0.0099054	0.157102	0.0373429	1	1	4.13e-08	1	1	1	1	1	0.0173604	NA	1	0.57403	1.35e-05	1	0.000914396	1	0.174402	0.0196295	1	0.0227714	6.4e-06	1.5e-06	1	0.000491701	1	0.328426	0.428699	0.273575	1	0.00286982	1	0.450756	0.0186932
c_Bacilli_Unclassified_1	0.895032	1	0.205867	2.95e-05	0.203856	1	0.0790285	1	0.00280779	0.747939	1	0.512104	1	0.0457692	0.119382	0.137995	1	1	0.332052	1	1	1	NA	0.0140163	0.360723	0.527968	1	1	1	1	1	0.0417718	1	0.537504	1	1	1	1	1	0.728502	1	1	1	0.538487	0.649229
Granulicatella	0.00609839	1	1	2.95e-05	0.000605282	0.105728	0.00167192	1	0.153696	1	0.270934	0.00326447	0.831684	0.0386233	0.000626866	1	0.786554	1	0.0584058	1	0.056538	0.57403	0.0349237	NA	0.00590159	0.357118	0.964975	1	0.395463	1	1	0.11866	0.648225	0.0184079	1	1	1	1	0.689264	0.012264	1	0.484989	1	0.0496615	0.507252
p_Candidate_division_tm7_Unclassified	0.00373838	0.00446713	1	0.0188535	0	0.000678563	5.12e-10	1	0.180169	0.0116652	8.58e-05	1.14e-12	0.966228	0.791185	3.8e-12	1	0.437324	1	0.160018	1	0.0446054	2.36e-05	0.876041	0.0140163	NA	0.0032365	0.364236	1	0.0265968	0.00320361	1	7.85e-05	0.000742192	3.75e-08	1	0.103886	0.314812	1	1	8.4e-06	0.268689	0.00857	0.138367	0.00568405	0.00682785
Campylobacter	0.0778258	0.0079621	1	0.0561592	2.02e-06	2.07e-07	0.0109783	1	0.142004	0.0541424	9.62e-06	1.65e-08	1	0.485467	0.00846391	0.66322	0.975275	1	1	1	0.000518174	1	0.98994	0.419991	0.00174273	NA	0.833513	1	0.00379938	0.12648	1	0.00448868	0.124103	0.00540299	1	1	0.0604353	1	1	0.0012387	0.145321	1	0.252882	0.36514	1
Wchb1.69	0.0735923	0.73526	1	1	0.00992972	0.176628	0.0707514	1	1	0.733074	0.570004	0.0737374	1	1	0.000102698	1	0.786554	1	1	1	0.0946575	0.000228599	1	0.813894	0.169977	0.463063	NA	1	0.770098	0.777162	1	0.00559372	0.0681273	0.00146262	1	0.750201	0.930949	1	1	0.0398942	1	0.0330568	1	1	0.867232
Ottowia	0.00116917	1	0.379866	1	0.499754	0.723343	1	1	1	0.0968919	0.676341	0.785517	1	1	1	0.526971	1	1	1	1	0.248778	1	1	1	1	0.729825	1	NA	0.395463	1	1	1	0.676125	0.714113	1	0.226868	0.930949	0.283467	0.140433	1	1	0.0459365	1	1	1
c_Betaproteobacteria_Unclassified_1	0.00422078	0.0483626	1	0.909193	0.00116707	2.44e-12	0.0109783	1	1	0.000678299	0.000166262	0.000227083	1	1	0.369323	1	0.249299	1	0.482581	1	0	0.145335	1	0.414295	0.0142206	0.00332445	0.964975	0.84409	NA	0.0195236	1	0.653277	0.288738	0.00250644	1	0.508514	0.242465	1	1	0.196385	0.687085	0.146257	1	1	1
p_Candidate_division_tm7_Uncultured_bacterium_Candidate_division_tm7	0.0115493	0.00924606	1	1	5e-05	0.00575273	0.000885201	1	1	0.00160672	0.000102186	0.000145815	1	1	0.002621	1	1	1	1	0.463822	0.0411279	0.0183208	1	1	0.00183064	0.114982	0.964975	1	0.0230734	NA	1	0.0464726	0.00178607	0.000638261	1	0.20248	0.0600923	0.166086	0.372721	0.233741	1	0.43226	0.912327	0.36514	0.812533
Corynebacterium	1	0.00169871	1	1	1	0.701714	1	1	1	1	1	1	1	1	1	1	0.738735	1	1	0.000148014	1	1	1	1	0.305461	0.516627	1	1	1	1	NA	0.0417718	1	1	1	1	0.706685	1	1	1	0.560674	1	1	1	1
c_Clostridia_Unclassified_1	0.446679	0.0170064	1	0.18685	6.24e-07	0.0170785	4.49e-06	1	0.0922771	0.0729411	0.260697	0.000304718	0.2148	0.570816	2.4e-07	1	1	1	1	1	0.352192	0.017936	0.127546	0.15356	3.93e-05	0.00398994	0.0125859	1	0.677473	0.0519399	0.249354	NA	0.00218228	0.0313288	1	1	1	1	1	0.0012387	1	0.0785919	1	1	0.100758
Catonella	0.0148169	0.301862	1	1	1.75e-05	0.0544502	3.87e-05	1	1	0.00123305	0.481274	0.00991932	1	1	2.45e-06	1	1	1	1	1	0.0446054	4.27e-06	1	0.624217	0.000445315	0.114982	0.153286	1	0.347993	0.002213	1	0.00311754	NA	0.00384835	1	3.33e-08	1	0.328426	0.256343	0.347634	1	0.00857	1	0.109679	0.00489087
Tannerella	1.17e-05	0.0170064	1	0.18685	2.18e-07	0.000214553	8.03e-07	0.524561	1	0.000163903	1.67e-08	4.85e-12	0.831684	1	4.9e-10	1	0.340209	1	0.332052	0.0592674	0.000518174	4.27e-06	1	0.0325679	3e-08	0.00982361	0.00731309	1	0.00515873	0.00207435	1	0.0417718	0.00577253	NA	1	0.263645	0.00178805	0.499681	0.348846	0.0012387	0.0075024	0.00900615	1	0.36514	0.501866
Lactobacillus	1	1	1	1	1	1	1	1	1	1	1	1	1	1	1	1	0.437324	1	1	1	1	1	1	1	1	1	1	1	0.959064	1	1	1	1	1	NA	1	1	1	1	1	1	1	1	1	0.202595
c_Clostridia_Incertae_sedis	0.198582	0.798014	1	1	0.000567607	0.287716	0.0148967	1	1	0.000489703	0.570004	0.299126	1	1	0.0102944	0.508832	1	1	1	1	0.352135	0.000228599	1	1	0.0457098	1	0.926718	0.526359	0.417968	0.12648	1	1	3.33e-08	0.131823	1	NA	1	0.047259	0.0657489	1	1	0.000413147	1	1	0.107693
c_Candidate_division_tm7_single.cell_isolate_tm7a_Candidate_division_tm7	0.256122	0.0820862	0.408545	1	0.125532	0.0607808	0.300817	1	1	0.00971356	3e-05	0.00101589	1	1	0.160562	1	0.102298	1	1	0.0746272	0.286922	1	1	1	0.192949	0.0431681	0.966755	1	0.228202	0.0359869	1	1	1	0.000298009	1	1	NA	0.047259	1	0.175328	0.0458314	0.348593	1	0.109679	1
Aggregatibacter	1	0.166526	1	0.115609	0.665609	1	0.375833	0.332794	1	0.000678299	0.570004	1	1	0.08291	0.313164	1	1	1	0.218761	1	1	0.208998	1	1	1	1	1	0.526359	1	0.0568703	1	1	0.205617	0.220448	1	0.0236295	0.0242839	NA	0.340161	1	1	0.0683884	1	1	1
Cardiobacterium	0.00566707	1	0.0391465	0.595274	0.168796	1	0.0707514	1	1	0.112103	0.852635	0.866045	1	1	0.452799	0.0366641	1	1	0.332052	0.463822	0.982569	0.303662	1	0.529531	1	1	1	0.234055	1	0.248481	1	1	0.107934	0.149967	1	0.0246558	1	0.283467	NA	1	0.167749	0.584436	1	1	0.373533
Dialister	0.199835	0.31513	1	0.00222678	2.61e-08	0.00575273	7.6e-05	1	0.106285	1	0.00125866	8.13e-09	1	0.0457692	9.93e-06	0.624438	0.20582	1	0.00162678	1	0.380741	0.297364	1	0.0180587	4.2e-06	0.00162333	0.108284	1	0.240026	0.244366	1	0.00185805	0.405573	0.000771179	1	1	0.242465	1	1	NA	0.581146	1	0.0554883	0.109679	0.137463
c_Actinobacteria_Unclassified_2	0.0669117	1	0.242905	1	0.0195606	0.175232	0.00484919	1	1	0.0708099	4.64e-05	0.000404081	1	1	0.0702691	1	1	1	1	2.69e-10	0.27638	1	1	1	0.136387	0.0645871	1	1	0.502101	0.886466	1	1	1	0.0018756	1	1	0.0392841	1	0.256343	0.355358	NA	1	1	1	0.867232
Johnsonella	0.00615115	0.0412004	1	1	0.000191162	0.00174924	0.0114262	1	1	0.000489703	0.0570427	0.0631639	1	1	0.00124036	1	1	1	1	1	0.0153194	0.00127548	1	0.506075	0.00380889	1	0.0716231	0.234055	0.182821	0.382384	1	0.0707327	0.00577253	0.00426607	1	0.000206573	0.360899	0.166086	0.730546	1	1	NA	1	0.253784	1
Atopobium	1	1	0.127971	0.180036	0.0159654	0.442776	1	1	0.627224	1	1	0.0547867	1	0.791185	0.64797	0.66322	1	1	1	1	1	1	1	1	0.0142206	0.0798573	1	1	1	0.375214	1	1	1	1	1	1	1	1	1	0.00462403	1	1	NA	0.253784	1
c_Clostridia_Unclassified_2	0.301901	0.493613	1	0.308517	0.00394217	0.837492	0.0546918	1	0.885563	1	0.157102	0.0155056	1	1	8.73e-05	1	0.45091	1	1	1	1	0.342574	0.876041	0.0180587	0.000947342	0.270012	1	1	1	0.248481	1	1	0.0580651	0.205391	1	1	0.0771933	1	1	0.0398942	1	0.155272	0.360494	NA	0.107693
Parvimonas	0.0475148	1	1	1	0.000497247	1	3.07e-07	1	0.79329	0.436061	1	0.242839	1	1	5.12e-05	0.77096	0.948979	1	1	1	1	0.0101963	0.876041	0.405802	0.0021337	1	0.964975	1	1	0.640195	1	0.0417718	0.00217372	0.220265	1	0.103886	1	1	0.348846	0.0756047	1	1	1	0.109679	NA

[truncated: 3 more sheets: Supplementary_Table_2k (SupP), Supplementary_Table_2l (TD), Supplementary_Table_2m (TH)]
