# Supplementary material
Source: HighWire-hosted journal article supplement (https://openres.ersjournals.com/content/5/3/00128-2017)
Supplement: inline-supplementary-material-10 [file inline-supplementary-material-10.pdf]

Supplementary Table S5a

| Taxa                                  | UA    | CF    | BE    | CFMW  |
|---------------------------------------|-------|-------|-------|-------|
| <i>Streptococcus pseudopneumoniae</i> | 37.43 | 2.05  | 36.36 | 4.15  |
| <i>Streptococcus salivarius</i>       | 11.72 | 9.72  | 9.75  | 4.33  |
| <i>Streptococcus parasanguinis</i>    | 5.77  | 16.89 | 8.84  | 10.98 |
| <i>Streptococcus infantis</i>         | 6.26  | 8.52  | 3.87  | 5.21  |
| <i>Streptococcus oralis</i>           | 25.54 | 54.18 | 5.07  | 54.33 |
| <i>Streptococcus mitis</i>            | 5.20  | 3.08  | 7.83  | 5.91  |
| <i>Streptococcus australis</i>        | 0.90  | 0.56  | 1.21  | 1.16  |
| <i>Streptococcus peroris</i>          | 0.04  | 0.81  | 1.23  | 8.23  |
| <i>Streptococcus sanguinis</i>        | 4.16  | 1.28  | 3.66  | 3.65  |
| <i>Streptococcus gordonii</i>         | 1.11  | 0.32  | 0.31  | 0.89  |
| <i>Streptococcus agalactiae</i>       | 0.01  | -     | 18.10 | -     |
| <i>Streptococcus cristatus</i>        | 0.97  | 0.42  | 1.29  | 0.48  |
| <i>Streptococcus constellatus</i>     | 0.06  | 1.04  | 1.45  | 0.08  |

Supplementary Table S5b

| Taxa                             | UA    | CF    | BE    | CFMW  |
|----------------------------------|-------|-------|-------|-------|
| <i>Prevotella melaninogenica</i> | 29.90 | 42.93 | 34.44 | 54.18 |
| <i>Prevotella bryantii</i>       | 13.67 | 0.13  | 1.28  | 0.23  |
| <i>Prevotella histicola</i>      | 16.87 | 26.32 | 22.63 | 28.57 |
| <i>Prevotella pallens</i>        | 6.54  | 4.06  | 3.42  | 3.89  |
| <i>Prevotella salivae</i>        | 5.36  | 3.82  | 5.60  | 2.02  |
| <i>Prevotella oris</i>           | 3.26  | 8.13  | 4.06  | 0.93  |
| <i>Prevotella veroralis</i>      | 2.38  | 2.60  | 2.37  | 4.61  |
| <i>Prevotella tanneriae</i>      | 1.28  | 2.69  | 12.94 | 0.21  |
| <i>Prevotella denticola</i>      | 0.55  | 1.14  | 0.77  | 2.60  |
| <i>Prevotella copri</i>          | 2.13  | 0.01  | 1.50  | -     |
| <i>Prevotella intermedia</i>     | 1.35  | 0.09  | 0.09  | -     |
| <i>Prevotella loeschii</i>       | 1.39  | 1.55  | 0.41  | 0.10  |
| <i>Prevotella nanceiensis</i>    | 4.82  | 2.47  | 2.86  | 0.49  |
| <i>Prevotella nigrescens</i>     | 3.84  | 1.07  | 2.37  | 0.53  |
| <i>Prevotella oulorum</i>        | 1.77  | 0.72  | 1.60  | 1.15  |
| <i>Prevotella shahii</i>         | 4.12  | 0.46  | 0.86  | 0.29  |

Supplementary Table S5c

| Taxa                            | UA    | CF    | BE    | CFMW  |
|---------------------------------|-------|-------|-------|-------|
| <i>Veillonella parvula</i>      | 69.12 | 20.79 | 37.55 | 54.85 |
| <i>Veillonella atypica</i>      | 20.31 | 53.49 | 52.37 | 33.10 |
| <i>Veillonella denticariosi</i> | 3.51  | 3.75  | 9.59  | 3.38  |
| <i>Veillonella dispar</i>       | 0.17  | 19.26 | 0.14  | 2.62  |
| <i>Veillonella magna</i>        | 6.70  | -     | 0.33  | 0.04  |
| <i>Veillonella rodentium</i>    | 0.01  | 1.54  | -     | 5.67  |

Supplementary Table S5d

| Taxa                            | UA*   | CF    | BE    | CFMW* |
|---------------------------------|-------|-------|-------|-------|
| <i>Pseudomonas aeruginosa</i>   | 1.04  | 99.95 | 99.96 | 100   |
| <i>Pseudomonas cedrina</i>      | 5.21  | -     | -     | -     |
| <i>Pseudomonas psychrophila</i> | 13.54 | -     | 0.01  | -     |
| <i>Pseudomonas panacis</i>      | 79.17 | -     | -     | -     |
| <i>Pseudomonas poae</i>         | 1.04  | 0.03  | -     | -     |

\*Pseudomonas spp. in very low relative abundance

Supplementary Table S5e

| Taxa                              | UA    | CF    | BE    | CFMW  |
|-----------------------------------|-------|-------|-------|-------|
| <i>Haemophilus influenzae</i>     | 26.21 | 94.02 | 97.80 | 19.89 |
| <i>Haemophilus parainfluenzae</i> | 73.37 | 5.62  | 2.19  | 80.11 |
